# Supplementary material for: Aberrantly expressed messenger RNAs and long noncoding RNAs in degenerative nucleus pulposus cells co-cultured with adipose-derived mesenchymal stem cells
Source: Arthritis Res Ther. 2018 Aug 16;20:182. doi: 10.1186/s13075-018-1677-x (PMC6097446; doi:10.1186/s13075-018-1677-x)
Supplement: Supplementary file 7 — Full list of differentially expressed mRNAs and lncRNAs. (XLSX 1394 kb) [file 13075_2018_1677_MOESM7_ESM.xlsx]

## Sheet: Differentially expressed  genes
Probe Set ID	Gene Symbol	Description	type	P-value	FDR	Geom mean of intensities in class hnp-con	Geom mean of intensities in class hnp	Fold-change(hnp/hnp-con)	style	mRNA Accession	mRNA Source	mRna - Description	Chromosome	Strand	Start	Stop	GO Biological Process ID	GO Biological Process Term	GO Biological Process Evidence	GO Cellular Component ID	GO Cellular Component Term	GO Cellular Component Evidence	GO Molecular Function ID	GO Molecular Function Term	GO Molecular Function Evidence	Pathway Source	Pathway Name	Protein Domains - Source	Protein Domains - Accession or domain name	Protein Domains - Description	category	up stream.10kb	intersense	down stream.10kb	antisense	hnp-1_(HuGene-2_0-st).rma-gene-full-Signal	hnp-2_(HuGene-2_0-st).rma-gene-full-Signal	hnp-3_(HuGene-2_0-st).rma-gene-full-Signal	hnp-con-1_(HuGene-2_0-st).rma-gene-full-Signal	hnp-con-2_(HuGene-2_0-st).rma-gene-full-Signal	hnp-con-3_(HuGene-2_0-st).rma-gene-full-Signal
16968680	SPP1	secreted phosphoprotein 1	coding	< 1e-07	< 1e-07	5.51	588.7	106.383	up	NM_001040058	RefSeq	Homo sapiens secreted phosphoprotein 1 (SPP1), transcript variant 1, mRNA.	chr4	+	88896802	88904563	GO:0001649 // GO:0006954 // GO:0007155 // GO:0007566 // GO:0010033 // GO:0031214 // GO:0033280 // GO:0045780 // GO:0046697 // GO:0048545 // GO:0048685 // GO:0001649 // GO:0006954 // GO:0007155 // GO:0007566 // GO:0010033 // GO:0031214 // GO:0033280 // GO:0045780 // GO:0046697 // GO:0048545 // GO:0048685 // GO:0001649 // GO:0006954 // GO:0007155 // GO:0007566 // GO:0010033 // GO:0031214 // GO:0033…	osteoblast differentiation // inflammatory response // cell adhesion // embryo implantation // response to organic substance // biomineral tissue development // response to vitamin D // positive regulation of bone resorption // decidualization // response to steroid hormone stimulus // negative regulation of collateral sprouting of intact axon in response to injury // osteoblast differentiation /…	inferred from electronic annotation // inferred from electronic annotation // inferred from electronic annotation // traceable author statement // inferred from electronic annotation // inferred from electronic annotation // inferred from direct assay // inferred from electronic annotation // traceable author statement // inferred from electronic annotation // inferred from electronic annotation …	GO:0005576 // GO:0005615 // GO:0031988 // GO:0042995 // GO:0048471 // GO:0005576 // GO:0005615 // GO:0031988 // GO:0042995 // GO:0048471 // GO:0005576 // GO:0005615 // GO:0031988 // GO:0042995 // GO:0048471 // GO:0005576 // GO:0005615 // GO:0031988 // GO:0042995 // GO:0048471 // GO:0005576 // GO:0005615 // GO:0031988 // GO:0042995 // GO:0048471 // GO:0005615 // GO:0005576 // GO:0042995 // GO:0048…	extracellular region // extracellular space // membrane-bounded vesicle // cell projection // perinuclear region of cytoplasm // extracellular region // extracellular space // membrane-bounded vesicle // cell projection // perinuclear region of cytoplasm // extracellular region // extracellular space // membrane-bounded vesicle // cell projection // perinuclear region of cytoplasm // extracellula…	not recorded // inferred from electronic annotation // inferred from electronic annotation // inferred from electronic annotation // inferred from electronic annotation // not recorded // inferred from electronic annotation // inferred from electronic annotation // inferred from electronic annotation // inferred from electronic annotation // not recorded // inferred from electronic annotation // …	GO:0005125 // GO:0005125 // GO:0005125 // GO:0005125 // GO:0005125 // GO:0005125 // GO:0050840 // GO:0005125 // GO:0005125 // GO:0005125	cytokine activity // cytokine activity // cytokine activity // cytokine activity // cytokine activity // cytokine activity // extracellular matrix binding // cytokine activity // cytokine activity // cytokine activity	inferred from electronic annotation // inferred from electronic annotation // inferred from electronic annotation // inferred from electronic annotation // inferred from electronic annotation // --- // --- // inferred from electronic annotation // inferred from electronic annotation // inferred from electronic annotation	GenMAPP	TGF_Beta_Signaling_Pathway	---	---	---	main					9.15446	9.17615	9.28174	2.61318	2.39376	2.33332
16819252	MT1F	metallothionein 1F	coding	< 1e-07	< 1e-07	5.65	444.35	76.9231	up	NM_005949	RefSeq	Homo sapiens metallothionein 1F (MT1F), mRNA.	chr16	+	56691855	56693215	GO:0008150 // GO:0008150 // GO:0008150 // GO:0008150 // GO:0008150	biological_process // biological_process // biological_process // biological_process // biological_process	no biological data available // no biological data available // --- // no biological data available // no biological data available	GO:0005737 // GO:0005737 // GO:0005737 // GO:0005737 // GO:0005737	cytoplasm // cytoplasm // cytoplasm // cytoplasm // cytoplasm	non-traceable author statement // non-traceable author statement // --- // non-traceable author statement // non-traceable author statement	GO:0005507 // GO:0008270 // GO:0046870 // GO:0046872 // GO:0005507 // GO:0008270 // GO:0046870 // GO:0046872 // GO:0046872 // GO:0005507 // GO:0008270 // GO:0046870 // GO:0005507 // GO:0008270 // GO:0046870 // GO:0046872 // GO:0005507 // GO:0008270 // GO:0046870 // GO:0046872 // GO:0046872	copper ion binding // zinc ion binding // cadmium ion binding // metal ion binding // copper ion binding // zinc ion binding // cadmium ion binding // metal ion binding // metal ion binding // copper ion binding // zinc ion binding // cadmium ion binding // copper ion binding // zinc ion binding // cadmium ion binding // metal ion binding // copper ion binding // zinc ion binding // cadmium ion b…	non-traceable author statement // non-traceable author statement // non-traceable author statement // inferred from electronic annotation // non-traceable author statement // non-traceable author statement // non-traceable author statement // inferred from electronic annotation // --- // --- // --- // --- // non-traceable author statement // non-traceable author statement // non-traceable author …	---	---	---	---	---	main	ENST00000379816 8429bp;				8.58601	8.82957	8.97924	2.66183	2.63877	2.15331
17012632	ENPP1	ectonucleotide pyrophosphatase/phosphodiesterase 1	coding	< 1e-07	< 1e-07	30.04	1050.91	34.4828	up	NM_006208	RefSeq	Homo sapiens ectonucleotide pyrophosphatase/phosphodiesterase 1 (ENPP1), mRNA.	chr6	+	132129156	132216295	GO:0006091 // GO:0006796 // GO:0006955 // GO:0009143 // GO:0030279 // GO:0030308 // GO:0030500 // GO:0030505 // GO:0030643 // GO:0030730 // GO:0031214 // GO:0031953 // GO:0032869 // GO:0045599 // GO:0045719 // GO:0046325 // GO:0046627 // GO:0046849 // GO:0050427 // GO:0006091 // GO:0006796 // GO:0006955 // GO:0009143 // GO:0030279 // GO:0030308 // GO:0030500 // GO:0030505 // GO:0030643 // GO:0030…	generation of precursor metabolites and energy // phosphate metabolic process // immune response // nucleoside triphosphate catabolic process // negative regulation of ossification // negative regulation of cell growth // regulation of bone mineralization // inorganic diphosphate transport // cellular phosphate ion homeostasis // sequestering of triglyceride // biomineral tissue development // ne…	inferred from direct assay // inferred from direct assay // inferred from electronic annotation // inferred from direct assay // inferred from electronic annotation // inferred from direct assay // inferred by curator // inferred from direct assay // inferred from direct assay // inferred from direct assay // inferred from electronic annotation // inferred from direct assay // inferred from direc…	GO:0005615 // GO:0005886 // GO:0005886 // GO:0009986 // GO:0016021 // GO:0016323 // GO:0005615 // GO:0005886 // GO:0005886 // GO:0009986 // GO:0016021 // GO:0016323 // GO:0005615 // GO:0005886 // GO:0016323 // GO:0016021 // GO:0009986 // GO:0005615 // GO:0005886 // GO:0005886 // GO:0009986 // GO:0016021 // GO:0016323 // GO:0005615 // GO:0005886 // GO:0005886 // GO:0009986 // GO:0016021 // GO:0016…	extracellular space // plasma membrane // plasma membrane // cell surface // integral to membrane // basolateral plasma membrane // extracellular space // plasma membrane // plasma membrane // cell surface // integral to membrane // basolateral plasma membrane // extracellular space // plasma membrane // basolateral plasma membrane // integral to membrane // cell surface // extracellular space //…	inferred from direct assay // not recorded // inferred from direct assay // inferred from direct assay // inferred from electronic annotation // non-traceable author statement // inferred from direct assay // not recorded // inferred from direct assay // inferred from direct assay // inferred from electronic annotation // non-traceable author statement // --- // --- // --- // --- // --- // inferr…	GO:0003676 // GO:0004528 // GO:0004551 // GO:0004551 // GO:0005044 // GO:0005158 // GO:0005515 // GO:0005524 // GO:0016787 // GO:0030247 // GO:0042803 // GO:0046872 // GO:0047429 // GO:0050656 // GO:0003676 // GO:0004528 // GO:0004551 // GO:0004551 // GO:0005044 // GO:0005158 // GO:0005515 // GO:0005524 // GO:0016787 // GO:0030247 // GO:0042803 // GO:0046872 // GO:0047429 // GO:0050656 // GO:0046…	nucleic acid binding // phosphodiesterase I activity // nucleotide diphosphatase activity // nucleotide diphosphatase activity // scavenger receptor activity // insulin receptor binding // protein binding // ATP binding // hydrolase activity // polysaccharide binding // protein homodimerization activity // metal ion binding // nucleoside-triphosphate diphosphatase activity // 3'-phosphoadenosine …	inferred from electronic annotation // inferred from electronic annotation // not recorded // inferred from direct assay // inferred from electronic annotation // inferred from direct assay // inferred from physical interaction // inferred from direct assay // inferred from electronic annotation // inferred from electronic annotation // inferred from direct assay // inferred from electronic annot…	---	---	---	---	---	main		ENST00000364025			9.92643	10.0276	10.1663	4.92863	4.39551	5.35777
16768391	EPYC	epiphycan	coding	< 1e-07	< 1e-07	4.72	162.44	34.4828	up	NM_004950	RefSeq	Homo sapiens epiphycan (EPYC), mRNA.	chr12	-	91357456	91398803	GO:0007565 // GO:0007565 // GO:0007565 // GO:0007565	female pregnancy // female pregnancy // female pregnancy // female pregnancy	traceable author statement // traceable author statement // --- // traceable author statement	GO:0005576 // GO:0005578 // GO:0005576 // GO:0005578 // GO:0005578 // GO:0005576 // GO:0005576 // GO:0005578	extracellular region // proteinaceous extracellular matrix // extracellular region // proteinaceous extracellular matrix // proteinaceous extracellular matrix // extracellular region // extracellular region // proteinaceous extracellular matrix	inferred from electronic annotation // inferred from electronic annotation // inferred from electronic annotation // inferred from electronic annotation // --- // --- // inferred from electronic annotation // inferred from electronic annotation	GO:0005539 // GO:0005539 // GO:0005539 // GO:0005515 // GO:0005539	glycosaminoglycan binding // glycosaminoglycan binding // glycosaminoglycan binding // protein binding // glycosaminoglycan binding	traceable author statement // traceable author statement // --- // --- // traceable author statement	---	---	---	---	---	main					7.20995	7.16776	7.6617	2.00726	2.59462	2.0682
17117110	CD24	CD24 molecule	coding	< 1e-07	< 1e-07	27.45	562.51	20.4082	up	NM_013230	RefSeq	Homo sapiens CD24 molecule (CD24), mRNA.	chrY	-	21152513	21154705	GO:0001666 // GO:0001775 // GO:0001959 // GO:0002237 // GO:0002768 // GO:0007204 // GO:0008629 // GO:0016055 // GO:0016337 // GO:0016477 // GO:0030856 // GO:0031295 // GO:0032597 // GO:0032600 // GO:0032913 // GO:0042104 // GO:0042325 // GO:0042632 // GO:0043406 // GO:0043408 // GO:0043627 // GO:0045730 // GO:0001666 // GO:0001775 // GO:0001959 // GO:0002237 // GO:0002768 // GO:0007204 // GO:0008…	response to hypoxia // cell activation // regulation of cytokine-mediated signaling pathway // response to molecule of bacterial origin // immune response-regulating cell surface receptor signaling pathway // elevation of cytosolic calcium ion concentration // induction of apoptosis by intracellular signals // Wnt receptor signaling pathway // cell-cell adhesion // cell migration // regulation of…	inferred from expression pattern // inferred from direct assay // inferred from sequence or structural similarity // inferred from sequence or structural similarity // inferred by curator // inferred from direct assay // non-traceable author statement // non-traceable author statement // non-traceable author statement // inferred from sequence or structural similarity // non-traceable author stat…	GO:0005886 // GO:0009986 // GO:0016020 // GO:0031225 // GO:0045121 // GO:0005886 // GO:0009986 // GO:0016020 // GO:0031225 // GO:0045121	plasma membrane // cell surface // membrane // anchored to membrane // membrane raft // plasma membrane // cell surface // membrane // anchored to membrane // membrane raft	inferred from electronic annotation // inferred from direct assay // inferred from direct assay // inferred from electronic annotation // inferred from direct assay // inferred from electronic annotation // inferred from direct assay // inferred from direct assay // inferred from electronic annotation // inferred from direct assay	GO:0004871 // GO:0005515 // GO:0019901 // GO:0030296 // GO:0004871 // GO:0005515 // GO:0019901 // GO:0030296	signal transducer activity // protein binding // protein kinase binding // protein tyrosine kinase activator activity // signal transducer activity // protein binding // protein kinase binding // protein tyrosine kinase activator activity	non-traceable author statement // inferred from physical interaction // inferred from physical interaction // inferred from direct assay // non-traceable author statement // inferred from physical interaction // inferred from physical interaction // inferred from direct assay	---	---	---	---	---	main		TCONS_l2_00030943-XLOC_l2_015950			9.02255	9.16611	9.22671	4.26012	4.69858	5.33243
16979432	C4orf31	chromosome 4 open reading frame 31	coding	< 1e-07	< 1e-07	5.09	91.42	17.8571	up	NM_024574	RefSeq	Homo sapiens chromosome 4 open reading frame 31 (C4orf31), mRNA.	chr4	-	121956768	121994176	GO:0010811 // GO:0019800 // GO:0030198 // GO:0010811 // GO:0019800 // GO:0030198 // GO:0019800 // GO:0010811 // GO:0030198 // GO:0010811 // GO:0019800 // GO:0030198 // GO:0010811 // GO:0019800 // GO:0030198 // GO:0010811 // GO:0019800 // GO:0030198	positive regulation of cell-substrate adhesion // peptide cross-linking via chondroitin 4-sulfate glycosaminoglycan // extracellular matrix organization // positive regulation of cell-substrate adhesion // peptide cross-linking via chondroitin 4-sulfate glycosaminoglycan // extracellular matrix organization // peptide cross-linking via chondroitin 4-sulfate glycosaminoglycan // positive regulatio…	inferred from electronic annotation // inferred from electronic annotation // inferred from electronic annotation // inferred from electronic annotation // inferred from electronic annotation // inferred from electronic annotation // --- // --- // --- // inferred from electronic annotation // inferred from electronic annotation // inferred from electronic annotation // inferred from electronic an…	GO:0005576 // GO:0031012 // GO:0005576 // GO:0031012 // GO:0005576 // GO:0031012 // GO:0005576 // GO:0031012 // GO:0005576 // GO:0031012 // GO:0005576 // GO:0031012	extracellular region // extracellular matrix // extracellular region // extracellular matrix // extracellular region // extracellular matrix // extracellular region // extracellular matrix // extracellular region // extracellular matrix // extracellular region // extracellular matrix	inferred from electronic annotation // inferred from electronic annotation // inferred from electronic annotation // inferred from electronic annotation // --- // --- // inferred from electronic annotation // inferred from electronic annotation // inferred from electronic annotation // inferred from electronic annotation // inferred from electronic annotation // inferred from electronic annotation	GO:0008201 // GO:0008201 // GO:0008201 // GO:0005539 // GO:0008201 // GO:0008201 // GO:0008201	heparin binding // heparin binding // heparin binding // glycosaminoglycan binding // heparin binding // heparin binding // heparin binding	inferred from electronic annotation // inferred from electronic annotation // --- // --- // inferred from electronic annotation // inferred from electronic annotation // inferred from electronic annotation	---	---	---	---	---	main		ENST00000411074		ENST00000507782	6.45217	6.59468	6.50478	2.27565	2.28604	2.43513
16906031	ZNF385B	zinc finger protein 385B	coding	< 1e-07	< 1e-07	3.31	55.4	16.6667	up	NM_152520	RefSeq	Homo sapiens zinc finger protein 385B (ZNF385B), transcript variant 1, mRNA.	chr2	-	180306709	180726232	---	---	---	GO:0005622 // GO:0005634 // GO:0005622 // GO:0005634 // GO:0005622 // GO:0005634 // GO:0005622 // GO:0005634 // GO:0005622 // GO:0005634 // GO:0005622 // GO:0005634 // GO:0005622 // GO:0005622 // GO:0005634 // GO:0005622 // GO:0005622 // GO:0005634 // GO:0005622 // GO:0005622 // GO:0005634 // GO:0005622 // GO:0005622 // GO:0005634 // GO:0005622 // GO:0005634 // GO:0005622 // GO:0005634 // GO:0005…	intracellular // nucleus // intracellular // nucleus // intracellular // nucleus // intracellular // nucleus // intracellular // nucleus // intracellular // nucleus // intracellular // intracellular // nucleus // intracellular // intracellular // nucleus // intracellular // intracellular // nucleus // intracellular // intracellular // nucleus // intracellular // nucleus // intracellular // nucleu…	inferred from electronic annotation // inferred from electronic annotation // inferred from electronic annotation // inferred from electronic annotation // inferred from electronic annotation // inferred from electronic annotation // inferred from electronic annotation // inferred from electronic annotation // --- // --- // inferred from electronic annotation // inferred from electronic annotatio…	GO:0003676 // GO:0008270 // GO:0046872 // GO:0003676 // GO:0008270 // GO:0046872 // GO:0003676 // GO:0008270 // GO:0046872 // GO:0003676 // GO:0008270 // GO:0046872 // GO:0008270 // GO:0003676 // GO:0046872 // GO:0003676 // GO:0008270 // GO:0046872 // GO:0003676 // GO:0008270 // GO:0003676 // GO:0008270 // GO:0046872 // GO:0003676 // GO:0008270 // GO:0003676 // GO:0008270 // GO:0046872 // GO:0003…	nucleic acid binding // zinc ion binding // metal ion binding // nucleic acid binding // zinc ion binding // metal ion binding // nucleic acid binding // zinc ion binding // metal ion binding // nucleic acid binding // zinc ion binding // metal ion binding // zinc ion binding // nucleic acid binding // metal ion binding // nucleic acid binding // zinc ion binding // metal ion binding // nucleic a…	inferred from electronic annotation // inferred from electronic annotation // inferred from electronic annotation // inferred from electronic annotation // inferred from electronic annotation // inferred from electronic annotation // inferred from electronic annotation // inferred from electronic annotation // inferred from electronic annotation // inferred from electronic annotation // inferred …	---	---	---	---	---	main		NR_031659			5.61301	5.97508	5.79543	1.71823	1.71221	1.70968
16782003	---	---	coding	< 1e-07	< 1e-07	3.73	53.91	14.4928	up	AY357942	GenBank	Homo sapiens T cell receptor delta-chain mRNA, complete cds; alternatively spliced.	chr14	+	22931924	22934779	---	---	---	---	---	---	---	---	---	---	---	---	---	---	main					5.39369	5.65054	6.22173	1.79044	1.71602	2.14155
16976029	KDR	kinase insert domain receptor (a type III receptor tyrosine kinase)	coding	< 1e-07	< 1e-07	4.3	57.74	13.5135	up	NM_002253	RefSeq	Homo sapiens kinase insert domain receptor (a type III receptor tyrosine kinase) (KDR), mRNA.	chr4	-	55944426	55991762	GO:0001525 // GO:0001541 // GO:0001570 // GO:0001938 // GO:0002053 // GO:0006468 // GO:0007169 // GO:0007275 // GO:0008284 // GO:0008360 // GO:0010595 // GO:0030097 // GO:0030335 // GO:0043129 // GO:0044419 // GO:0045165 // GO:0045446 // GO:0048286 // GO:0048469 // GO:0048754 // GO:0050927 // GO:0051894 // GO:0055074 // GO:0001525 // GO:0001541 // GO:0001570 // GO:0001938 // GO:0002053 // GO:0006…	angiogenesis // ovarian follicle development // vasculogenesis // positive regulation of endothelial cell proliferation // positive regulation of mesenchymal cell proliferation // protein phosphorylation // transmembrane receptor protein tyrosine kinase signaling pathway // multicellular organismal development // positive regulation of cell proliferation // regulation of cell shape // positive re…	traceable author statement // inferred from electronic annotation // inferred from electronic annotation // inferred from mutant phenotype // inferred from electronic annotation // inferred from electronic annotation // traceable author statement // inferred from electronic annotation // inferred from direct assay // inferred from direct assay // inferred from mutant phenotype // inferred from el…	GO:0005887 // GO:0016020 // GO:0005887 // GO:0016020 // GO:0016020 // GO:0005887 // GO:0005887 // GO:0016020	integral to plasma membrane // membrane // integral to plasma membrane // membrane // membrane // integral to plasma membrane // integral to plasma membrane // membrane	inferred from electronic annotation // inferred from electronic annotation // inferred from electronic annotation // inferred from electronic annotation // --- // --- // inferred from electronic annotation // inferred from electronic annotation	GO:0000166 // GO:0004714 // GO:0004716 // GO:0004872 // GO:0005021 // GO:0005178 // GO:0005515 // GO:0005524 // GO:0016740 // GO:0019838 // GO:0051879 // GO:0000166 // GO:0004714 // GO:0004716 // GO:0004872 // GO:0005021 // GO:0005178 // GO:0005515 // GO:0005524 // GO:0016740 // GO:0019838 // GO:0051879 // GO:0005021 // GO:0000166 // GO:0005515 // GO:0004714 // GO:0016740 // GO:0051879 // GO:0004…	nucleotide binding // transmembrane receptor protein tyrosine kinase activity // receptor signaling protein tyrosine kinase activity // receptor activity // vascular endothelial growth factor receptor activity // integrin binding // protein binding // ATP binding // transferase activity // growth factor binding // Hsp90 protein binding // nucleotide binding // transmembrane receptor protein tyros…	inferred from electronic annotation // traceable author statement // traceable author statement // inferred from electronic annotation // inferred from direct assay // inferred from physical interaction // inferred from physical interaction // inferred from electronic annotation // inferred from electronic annotation // inferred from physical interaction // traceable author statement // inferred …	---	---	Pfam	IPR013162	CD80-like C2-set immunoglobulin	main				ENST00000511222	5.56544	6.08386	5.91328	2.27956	2.11881	1.86788
16878731	EHD3	EH-domain containing 3	coding	< 1e-07	< 1e-07	9.62	120.02	12.5	up	NM_014600	RefSeq	Homo sapiens EH-domain containing 3 (EHD3), mRNA.	chr2	+	31456880	31492313	---	---	---	GO:0005634 // GO:0005768 // GO:0005886 // GO:0030139 // GO:0055038 // GO:0005634 // GO:0005768 // GO:0005886 // GO:0030139 // GO:0055038 // GO:0055038 // GO:0005634 // GO:0005768 // GO:0030139 // GO:0005886 // GO:0005634 // GO:0005768 // GO:0005886 // GO:0030139 // GO:0055038	nucleus // endosome // plasma membrane // endocytic vesicle // recycling endosome membrane // nucleus // endosome // plasma membrane // endocytic vesicle // recycling endosome membrane // recycling endosome membrane // nucleus // endosome // endocytic vesicle // plasma membrane // nucleus // endosome // plasma membrane // endocytic vesicle // recycling endosome membrane	traceable author statement // inferred from electronic annotation // inferred from electronic annotation // inferred from electronic annotation // inferred from electronic annotation // traceable author statement // inferred from electronic annotation // inferred from electronic annotation // inferred from electronic annotation // inferred from electronic annotation // --- // --- // --- // --- //…	GO:0000166 // GO:0003676 // GO:0003924 // GO:0005509 // GO:0005515 // GO:0005524 // GO:0005525 // GO:0000166 // GO:0003676 // GO:0003924 // GO:0005509 // GO:0005515 // GO:0005524 // GO:0005525 // GO:0003676 // GO:0005524 // GO:0005525 // GO:0005509 // GO:0000166 // GO:0003924 // GO:0005515 // GO:0000166 // GO:0003676 // GO:0003924 // GO:0005509 // GO:0005515 // GO:0005524 // GO:0005525	nucleotide binding // nucleic acid binding // GTPase activity // calcium ion binding // protein binding // ATP binding // GTP binding // nucleotide binding // nucleic acid binding // GTPase activity // calcium ion binding // protein binding // ATP binding // GTP binding // nucleic acid binding // ATP binding // GTP binding // calcium ion binding // nucleotide binding // GTPase activity // protein…	inferred from electronic annotation // traceable author statement // inferred from electronic annotation // inferred from electronic annotation // inferred from electronic annotation // inferred from electronic annotation // inferred from electronic annotation // inferred from electronic annotation // traceable author statement // inferred from electronic annotation // inferred from electronic an…	---	---	---	---	---	main			TCONS_00004742-XLOC_001415 2416bp;		6.82209	6.92036	6.98721	3.29965	3.123	3.32914
16841137	GAS7	growth arrest-specific 7	coding	< 1e-07	< 1e-07	6.12	76.09	12.5	up	NM_201433	RefSeq	Homo sapiens growth arrest-specific 7 (GAS7), transcript variant c, mRNA.	chr17	-	9813926	10101868	GO:0007050 // GO:0007275 // GO:0007399 // GO:0008360 // GO:0030041 // GO:0030182 // GO:0048812 // GO:0051017 // GO:0007050 // GO:0007275 // GO:0007399 // GO:0008360 // GO:0030041 // GO:0030182 // GO:0048812 // GO:0051017 // GO:0007050 // GO:0007275 // GO:0007399 // GO:0008360 // GO:0030041 // GO:0030182 // GO:0048812 // GO:0051017 // GO:0007050 // GO:0007275 // GO:0007399 // GO:0008360 // GO:0030…	cell cycle arrest // multicellular organismal development // nervous system development // regulation of cell shape // actin filament polymerization // neuron differentiation // neuron projection morphogenesis // actin filament bundle assembly // cell cycle arrest // multicellular organismal development // nervous system development // regulation of cell shape // actin filament polymerization // …	traceable author statement // inferred from electronic annotation // inferred from electronic annotation // inferred from electronic annotation // inferred from electronic annotation // inferred from electronic annotation // inferred from electronic annotation // inferred from electronic annotation // traceable author statement // inferred from electronic annotation // inferred from electronic an…	GO:0001726 // GO:0005737 // GO:0005884 // GO:0001726 // GO:0005737 // GO:0005884 // GO:0001726 // GO:0005737 // GO:0005884 // GO:0001726 // GO:0005737 // GO:0005884 // GO:0001726 // GO:0005737 // GO:0005884 // GO:0001726 // GO:0005737 // GO:0005884 // GO:0005884 // GO:0001726 // GO:0005737 // GO:0001726 // GO:0005737 // GO:0005884 // GO:0001726 // GO:0005737 // GO:0005884 // GO:0001726 // GO:0005…	ruffle // cytoplasm // actin filament // ruffle // cytoplasm // actin filament // ruffle // cytoplasm // actin filament // ruffle // cytoplasm // actin filament // ruffle // cytoplasm // actin filament // ruffle // cytoplasm // actin filament // actin filament // ruffle // cytoplasm // ruffle // cytoplasm // actin filament // ruffle // cytoplasm // actin filament // ruffle // cytoplasm // actin f…	inferred from electronic annotation // inferred from electronic annotation // inferred from electronic annotation // inferred from electronic annotation // inferred from electronic annotation // inferred from electronic annotation // inferred from electronic annotation // inferred from electronic annotation // inferred from electronic annotation // inferred from electronic annotation // inferred …	GO:0003700 // GO:0005515 // GO:0051015 // GO:0003700 // GO:0005515 // GO:0051015 // GO:0003700 // GO:0005515 // GO:0051015 // GO:0003700 // GO:0005515 // GO:0051015 // GO:0003700 // GO:0005515 // GO:0051015 // GO:0005515 // GO:0003700 // GO:0005515 // GO:0051015 // GO:0051015 // GO:0005515 // GO:0003700 // GO:0003700 // GO:0005515 // GO:0051015 // GO:0005515 // GO:0003700 // GO:0005515 // GO:0051…	sequence-specific DNA binding transcription factor activity // protein binding // actin filament binding // sequence-specific DNA binding transcription factor activity // protein binding // actin filament binding // sequence-specific DNA binding transcription factor activity // protein binding // actin filament binding // sequence-specific DNA binding transcription factor activity // protein bind…	traceable author statement // inferred from electronic annotation // inferred from electronic annotation // traceable author statement // inferred from electronic annotation // inferred from electronic annotation // traceable author statement // inferred from electronic annotation // inferred from electronic annotation // traceable author statement // inferred from electronic annotation // inferr…	---	---	---	---	---	main				ENST00000408559 AK098731	6.04875	6.22227	6.48613	2.79976	2.55327	2.44164
17093861	MSMP	microseminoprotein, prostate associated	coding	< 1e-07	< 1e-07	12.94	154.4	11.9048	up	NM_001044264	RefSeq	Homo sapiens microseminoprotein, prostate associated (MSMP), mRNA.	chr9	-	35752987	35756610	---	---	---	GO:0005576 // GO:0005576 // GO:0005576 // GO:0005576	extracellular region // extracellular region // extracellular region // extracellular region	inferred from electronic annotation // inferred from electronic annotation // --- // inferred from electronic annotation	---	---	---	---	---	---	---	---	main	ENST00000425499 99bp;				7.2523	7.22863	7.3388	3.72524	3.59007	3.723
16904551	GALNT3	UDP-N-acetyl-alpha-D-galactosamine:polypeptide N-acetylgalactosaminyltransferase 3 (GalNAc-T3)	coding	< 1e-07	< 1e-07	5.52	64.86	11.7647	up	NM_004482	RefSeq	Homo sapiens UDP-N-acetyl-alpha-D-galactosamine:polypeptide N-acetylgalactosaminyltransferase 3 (GalNAc-T3) (GALNT3), mRNA.	chr2	-	166604101	166651192	GO:0005975 // GO:0018242 // GO:0018243 // GO:0005975 // GO:0018242 // GO:0018243 // GO:0018243 // GO:0018242 // GO:0005975 // GO:0005975 // GO:0018242 // GO:0018243 // GO:0005975 // GO:0018242 // GO:0018243 // GO:0005975 // GO:0018242 // GO:0018243 // GO:0005975 // GO:0018242 // GO:0018243 // GO:0005975 // GO:0018242 // GO:0018243 // GO:0005975 // GO:0018242 // GO:0018243 // GO:0005975 // GO:0018…	carbohydrate metabolic process // protein O-linked glycosylation via serine // protein O-linked glycosylation via threonine // carbohydrate metabolic process // protein O-linked glycosylation via serine // protein O-linked glycosylation via threonine // protein amino acid O-linked glycosylation via threonine // protein amino acid O-linked glycosylation via serine // carbohydrate metabolic process…	non-traceable author statement // inferred from direct assay // inferred from direct assay // non-traceable author statement // inferred from direct assay // inferred from direct assay // --- // --- // --- // non-traceable author statement // inferred from direct assay // inferred from direct assay // non-traceable author statement // inferred from direct assay // inferred from direct assay // no…	GO:0005624 // GO:0005794 // GO:0016020 // GO:0016021 // GO:0032580 // GO:0048471 // GO:0005624 // GO:0005794 // GO:0016020 // GO:0016021 // GO:0032580 // GO:0048471 // GO:0016021 // GO:0005624 // GO:0048471 // GO:0005794 // GO:0032580 // GO:0016020 // GO:0005624 // GO:0005794 // GO:0016020 // GO:0016021 // GO:0032580 // GO:0048471 // GO:0005624 // GO:0005794 // GO:0016020 // GO:0016021 // GO:0032…	membrane fraction // Golgi apparatus // membrane // integral to membrane // Golgi cisterna membrane // perinuclear region of cytoplasm // membrane fraction // Golgi apparatus // membrane // integral to membrane // Golgi cisterna membrane // perinuclear region of cytoplasm // integral to membrane // membrane fraction // perinuclear region of cytoplasm // Golgi apparatus // Golgi cisterna membrane …	traceable author statement // inferred from direct assay // inferred from electronic annotation // inferred from electronic annotation // inferred from electronic annotation // inferred from direct assay // traceable author statement // inferred from direct assay // inferred from electronic annotation // inferred from electronic annotation // inferred from electronic annotation // inferred from d…	GO:0004653 // GO:0005509 // GO:0005529 // GO:0016757 // GO:0030145 // GO:0004653 // GO:0005509 // GO:0005529 // GO:0016757 // GO:0030145 // GO:0004653 // GO:0016757 // GO:0030145 // GO:0005529 // GO:0005509 // GO:0004653 // GO:0005509 // GO:0005529 // GO:0016757 // GO:0030145 // GO:0004653 // GO:0005509 // GO:0005529 // GO:0016757 // GO:0030145 // GO:0004653 // GO:0005509 // GO:0005529 // GO:0016…	polypeptide N-acetylgalactosaminyltransferase activity // calcium ion binding // sugar binding // transferase activity, transferring glycosyl groups // manganese ion binding // polypeptide N-acetylgalactosaminyltransferase activity // calcium ion binding // sugar binding // transferase activity, transferring glycosyl groups // manganese ion binding // polypeptide N-acetylgalactosaminyltransferase…	inferred from direct assay // inferred from direct assay // inferred from electronic annotation // inferred from electronic annotation // inferred from direct assay // inferred from direct assay // inferred from direct assay // inferred from electronic annotation // inferred from electronic annotation // inferred from direct assay // --- // --- // --- // --- // --- // inferred from direct assay /…	---	---	Pfam // Pfam	IPR001173 // IPR000772	Glycosyl transferase, family 2 // Ricin B lectin	main	ENST00000428888 175bp;				5.98441	6.02152	6.06021	2.34235	2.43478	2.57112
16761927	SLC15A5	solute carrier family 15, member 5	coding	< 1e-07	< 1e-07	4.26	47.89	11.236	up	NM_001170798	RefSeq	Homo sapiens solute carrier family 15, member 5 (SLC15A5), mRNA.	chr12	-	16341419	16430619	GO:0006857 // GO:0015031 // GO:0006857 // GO:0015031 // GO:0015031 // GO:0006857	oligopeptide transport // protein transport // oligopeptide transport // protein transport // protein transport // oligopeptide transport	inferred from electronic annotation // inferred from electronic annotation // inferred from electronic annotation // inferred from electronic annotation // --- // ---	GO:0016020 // GO:0016021 // GO:0016020 // GO:0016021 // GO:0016020 // GO:0016021	membrane // integral to membrane // membrane // integral to membrane // membrane // integral to membrane	inferred from electronic annotation // inferred from electronic annotation // inferred from electronic annotation // inferred from electronic annotation // --- // ---	GO:0005215 // GO:0015293 // GO:0005215 // GO:0015293 // GO:0015293 // GO:0005215	transporter activity // symporter activity // transporter activity // symporter activity // symporter activity // transporter activity	inferred from electronic annotation // inferred from electronic annotation // inferred from electronic annotation // inferred from electronic annotation // --- // ---	---	---	---	---	---	main					5.56188	5.70096	5.4901	2.23671	2.00806	1.98225
16994779	CDH10	cadherin 10, type 2 (T2-cadherin)	coding	< 1e-07	< 1e-07	3.59	37.57	10.4167	up	NM_006727	RefSeq	Homo sapiens cadherin 10, type 2 (T2-cadherin) (CDH10), transcript variant 1, mRNA.	chr5	-	24487209	24645087	GO:0007156 // GO:0016337 // GO:0007156 // GO:0016337 // GO:0007156 // GO:0016337 // GO:0016337 // GO:0007156 // GO:0007156 // GO:0016337 // GO:0007156 // GO:0016337 // GO:0007156	homophilic cell adhesion // cell-cell adhesion // homophilic cell adhesion // cell-cell adhesion // homophilic cell adhesion // cell-cell adhesion // cell-cell adhesion // homophilic cell adhesion // homophilic cell adhesion // cell-cell adhesion // homophilic cell adhesion // cell-cell adhesion // homophilic cell adhesion	non-traceable author statement // non-traceable author statement // non-traceable author statement // non-traceable author statement // non-traceable author statement // non-traceable author statement // --- // --- // non-traceable author statement // non-traceable author statement // non-traceable author statement // non-traceable author statement // ---	GO:0005886 // GO:0016021 // GO:0005886 // GO:0016021 // GO:0005886 // GO:0016021 // GO:0005886 // GO:0016021 // GO:0016020 // GO:0005886 // GO:0016021 // GO:0005886 // GO:0016021 // GO:0016020	plasma membrane // integral to membrane // plasma membrane // integral to membrane // plasma membrane // integral to membrane // plasma membrane // integral to membrane // membrane // plasma membrane // integral to membrane // plasma membrane // integral to membrane // membrane	not recorded // non-traceable author statement // not recorded // non-traceable author statement // not recorded // non-traceable author statement // --- // --- // --- // not recorded // non-traceable author statement // not recorded // non-traceable author statement // ---	GO:0005509 // GO:0005509 // GO:0005509 // GO:0005509 // GO:0005509 // GO:0005509 // GO:0005509	calcium ion binding // calcium ion binding // calcium ion binding // calcium ion binding // calcium ion binding // calcium ion binding // calcium ion binding	inferred from electronic annotation // inferred from electronic annotation // inferred from electronic annotation // --- // inferred from electronic annotation // inferred from electronic annotation // ---	---	---	---	---	---	main				CR599446	4.89218	5.30016	5.51054	1.93265	1.60092	1.95815
16743111	CTSC	cathepsin C	coding	< 1e-07	< 1e-07	42.87	381.45	9.09091	up	NM_001814	RefSeq	Homo sapiens cathepsin C (CTSC), transcript variant 1, mRNA.	chr11	-	88026760	88070955	GO:0006508 // GO:0006955 // GO:0007568 // GO:0010033 // GO:0006508 // GO:0006955 // GO:0007568 // GO:0010033 // GO:0006508 // GO:0006955 // GO:0007568 // GO:0010033 // GO:0006508 // GO:0006955 // GO:0007568 // GO:0010033 // GO:0006508 // GO:0007568 // GO:0010033 // GO:0006955 // GO:0006508 // GO:0006955 // GO:0007568 // GO:0010033 // GO:0006508 // GO:0007568 // GO:0010033 // GO:0006955 // GO:0006…	proteolysis // immune response // aging // response to organic substance // proteolysis // immune response // aging // response to organic substance // proteolysis // immune response // aging // response to organic substance // proteolysis // immune response // aging // response to organic substance // proteolysis // aging // response to organic substance // immune response // proteolysis // immu…	inferred from electronic annotation // traceable author statement // inferred from electronic annotation // inferred from electronic annotation // inferred from electronic annotation // traceable author statement // inferred from electronic annotation // inferred from electronic annotation // inferred from electronic annotation // traceable author statement // inferred from electronic annotation …	GO:0005764 // GO:0005783 // GO:0005794 // GO:0005764 // GO:0005783 // GO:0005794 // GO:0005764 // GO:0005783 // GO:0005794 // GO:0005764 // GO:0005783 // GO:0005794 // GO:0005794 // GO:0005783 // GO:0005764 // GO:0005764 // GO:0005783 // GO:0005794 // GO:0005794 // GO:0005783 // GO:0005764 // GO:0005764 // GO:0005783 // GO:0005794 // GO:0005764 // GO:0005783 // GO:0005794 // GO:0005764 // GO:0005…	lysosome // endoplasmic reticulum // Golgi apparatus // lysosome // endoplasmic reticulum // Golgi apparatus // lysosome // endoplasmic reticulum // Golgi apparatus // lysosome // endoplasmic reticulum // Golgi apparatus // Golgi apparatus // endoplasmic reticulum // lysosome // lysosome // endoplasmic reticulum // Golgi apparatus // Golgi apparatus // endoplasmic reticulum // lysosome // lysosom…	traceable author statement // inferred from electronic annotation // inferred from electronic annotation // traceable author statement // inferred from electronic annotation // inferred from electronic annotation // traceable author statement // inferred from electronic annotation // inferred from electronic annotation // traceable author statement // inferred from electronic annotation // inferr…	GO:0004197 // GO:0008233 // GO:0031404 // GO:0042802 // GO:0043621 // GO:0004197 // GO:0008233 // GO:0031404 // GO:0042802 // GO:0043621 // GO:0004197 // GO:0008233 // GO:0031404 // GO:0042802 // GO:0043621 // GO:0004197 // GO:0008233 // GO:0031404 // GO:0042802 // GO:0043621 // GO:0042802 // GO:0004197 // GO:0031404 // GO:0008233 // GO:0043621 // GO:0008234 // GO:0004197 // GO:0008233 // GO:0031…	cysteine-type endopeptidase activity // peptidase activity // chloride ion binding // identical protein binding // protein self-association // cysteine-type endopeptidase activity // peptidase activity // chloride ion binding // identical protein binding // protein self-association // cysteine-type endopeptidase activity // peptidase activity // chloride ion binding // identical protein binding /…	inferred from electronic annotation // inferred from electronic annotation // inferred from electronic annotation // inferred from electronic annotation // inferred from electronic annotation // inferred from electronic annotation // inferred from electronic annotation // inferred from electronic annotation // inferred from electronic annotation // inferred from electronic annotation // inferred …	---	---	---	---	---	main					8.50329	8.56744	8.66351	5.31699	5.33863	5.56564
16846887	TMEM100	transmembrane protein 100	coding	8.0E-7	1.1E-4	3.37	30.21	9.09091	up	NM_001099640	RefSeq	Homo sapiens transmembrane protein 100 (TMEM100), transcript variant 1, mRNA.	chr17	-	53796988	53809482	GO:0008150 // GO:0008150 // GO:0008150 // GO:0008150 // GO:0008150 // GO:0008150 // GO:0008150	biological_process // biological_process // biological_process // biological_process // biological_process // biological_process // biological_process	no biological data available // no biological data available // no biological data available // --- // no biological data available // --- // no biological data available	GO:0005575 // GO:0016020 // GO:0016021 // GO:0005575 // GO:0016020 // GO:0016021 // GO:0005575 // GO:0016020 // GO:0016021 // GO:0016021 // GO:0016020 // GO:0005575 // GO:0005575 // GO:0016020 // GO:0016021 // GO:0016021 // GO:0016020 // GO:0005575 // GO:0005575 // GO:0016020 // GO:0016021	cellular_component // membrane // integral to membrane // cellular_component // membrane // integral to membrane // cellular_component // membrane // integral to membrane // integral to membrane // membrane // cellular_component // cellular_component // membrane // integral to membrane // integral to membrane // membrane // cellular_component // cellular_component // membrane // integral to membr…	no biological data available // inferred from electronic annotation // inferred from electronic annotation // no biological data available // inferred from electronic annotation // inferred from electronic annotation // no biological data available // inferred from electronic annotation // inferred from electronic annotation // --- // --- // --- // no biological data available // inferred from el…	GO:0003674 // GO:0003674 // GO:0003674 // GO:0003674 // GO:0003674 // GO:0003674 // GO:0003674	molecular_function // molecular_function // molecular_function // molecular_function // molecular_function // molecular_function // molecular_function	no biological data available // no biological data available // no biological data available // --- // no biological data available // --- // no biological data available	---	---	---	---	---	main					5.41593	5.2136	4.12935	1.4575	1.92312	1.83787
16833218	CCL11	chemokine (C-C motif) ligand 11	coding	< 1e-07	< 1e-07	8.27	66.97	8.33333	up	NM_002986	RefSeq	Homo sapiens chemokine (C-C motif) ligand 11 (CCL11), mRNA.	chr17	+	32612687	32615199	GO:0001938 // GO:0006468 // GO:0006874 // GO:0006935 // GO:0006954 // GO:0006955 // GO:0007155 // GO:0007165 // GO:0009314 // GO:0009615 // GO:0030335 // GO:0030838 // GO:0032855 // GO:0045766 // GO:0060444 // GO:0060763 // GO:0001938 // GO:0006468 // GO:0006874 // GO:0006935 // GO:0006954 // GO:0006955 // GO:0007155 // GO:0007165 // GO:0009314 // GO:0009615 // GO:0030335 // GO:0030838 // GO:0032…	positive regulation of endothelial cell proliferation // protein phosphorylation // cellular calcium ion homeostasis // chemotaxis // inflammatory response // immune response // cell adhesion // signal transduction // response to radiation // response to virus // positive regulation of cell migration // positive regulation of actin filament polymerization // positive regulation of Rac GTPase acti…	inferred from direct assay // traceable author statement // traceable author statement // inferred from electronic annotation // inferred from electronic annotation // inferred from electronic annotation // traceable author statement // traceable author statement // traceable author statement // traceable author statement // inferred from direct assay // inferred from direct assay // inferred fro…	GO:0005576 // GO:0005615 // GO:0005576 // GO:0005615 // GO:0005615 // GO:0005576 // GO:0005576 // GO:0005615	extracellular region // extracellular space // extracellular region // extracellular space // extracellular space // extracellular region // extracellular region // extracellular space	not recorded // inferred from electronic annotation // not recorded // inferred from electronic annotation // --- // --- // not recorded // inferred from electronic annotation	GO:0008009 // GO:0008009 // GO:0008009 // GO:0008009	chemokine activity // chemokine activity // chemokine activity // chemokine activity	inferred from electronic annotation // inferred from electronic annotation // --- // inferred from electronic annotation	---	---	---	---	---	main					5.9138	6.23114	6.05936	3.0102	2.8249	3.26445
17106438	DOCK11	dedicator of cytokinesis 11	coding	< 1e-07	< 1e-07	37.98	314.15	8.33333	up	NM_144658	RefSeq	Homo sapiens dedicator of cytokinesis 11 (DOCK11), mRNA.	chrX	+	117629861	117820126	---	---	---	---	---	---	GO:0005085 // GO:0005525 // GO:0051020 // GO:0005085 // GO:0005525 // GO:0051020 // GO:0005085 // GO:0051020 // GO:0005525 // GO:0005085 // GO:0005525 // GO:0051020	guanyl-nucleotide exchange factor activity // GTP binding // GTPase binding // guanyl-nucleotide exchange factor activity // GTP binding // GTPase binding // guanyl-nucleotide exchange factor activity // GTPase binding // GTP binding // guanyl-nucleotide exchange factor activity // GTP binding // GTPase binding	inferred from electronic annotation // inferred from electronic annotation // inferred from electronic annotation // inferred from electronic annotation // inferred from electronic annotation // inferred from electronic annotation // --- // --- // --- // inferred from electronic annotation // inferred from electronic annotation // inferred from electronic annotation	---	---	---	---	---	main					8.18636	8.31689	8.39082	5.30149	4.96603	5.42968
17055354	ETV1	ets variant 1	coding	< 1e-07	< 1e-07	5.28	43.56	8.33333	up	NM_004956	RefSeq	Homo sapiens ets variant 1 (ETV1), transcript variant 1, mRNA.	chr7	-	13930853	14031050	GO:0006355 // GO:0006366 // GO:0006355 // GO:0006366 // GO:0006355 // GO:0006366 // GO:0006355 // GO:0006366 // GO:0006355 // GO:0006366 // GO:0006355 // GO:0006366 // GO:0006355 // GO:0006366 // GO:0006355 // GO:0006366 // GO:0006366 // GO:0006355 // GO:0006355 // GO:0006366 // GO:0006366 // GO:0006355 // GO:0006355 // GO:0006366 // GO:0006355 // GO:0006366 // GO:0006355 // GO:0006366 // GO:0006…	regulation of transcription, DNA-dependent // transcription from RNA polymerase II promoter // regulation of transcription, DNA-dependent // transcription from RNA polymerase II promoter // regulation of transcription, DNA-dependent // transcription from RNA polymerase II promoter // regulation of transcription, DNA-dependent // transcription from RNA polymerase II promoter // regulation of trans…	inferred from electronic annotation // traceable author statement // inferred from electronic annotation // traceable author statement // inferred from electronic annotation // traceable author statement // inferred from electronic annotation // traceable author statement // inferred from electronic annotation // traceable author statement // inferred from electronic annotation // traceable autho…	GO:0005634 // GO:0005634 // GO:0005634 // GO:0005634 // GO:0005634 // GO:0005634 // GO:0005634 // GO:0005634 // GO:0005634 // GO:0005634 // GO:0005634 // GO:0005634 // GO:0005634 // GO:0005634 // GO:0005634 // GO:0005634 // GO:0005634 // GO:0005634 // GO:0005634 // GO:0005634 // GO:0005634 // GO:0005634 // GO:0005634 // GO:0005634 // GO:0005634 // GO:0005634 // GO:0005634 // GO:0005634 // GO:0005…	nucleus // nucleus // nucleus // nucleus // nucleus // nucleus // nucleus // nucleus // nucleus // nucleus // nucleus // nucleus // nucleus // nucleus // nucleus // nucleus // nucleus // nucleus // nucleus // nucleus // nucleus // nucleus // nucleus // nucleus // nucleus // nucleus // nucleus // nucleus // nucleus // nucleus // nucleus // nucleus // nucleus // nucleus // nucleus // nucleus // nuc…	inferred from electronic annotation // inferred from electronic annotation // inferred from electronic annotation // inferred from electronic annotation // inferred from electronic annotation // inferred from electronic annotation // inferred from electronic annotation // inferred from electronic annotation // --- // inferred from electronic annotation // --- // inferred from electronic annotatio…	GO:0003700 // GO:0043565 // GO:0003700 // GO:0043565 // GO:0003700 // GO:0043565 // GO:0003700 // GO:0043565 // GO:0003700 // GO:0043565 // GO:0003700 // GO:0043565 // GO:0003700 // GO:0043565 // GO:0003700 // GO:0043565 // GO:0043565 // GO:0003700 // GO:0003700 // GO:0043565 // GO:0043565 // GO:0003700 // GO:0003700 // GO:0043565 // GO:0003700 // GO:0043565 // GO:0003700 // GO:0043565 // GO:0003…	sequence-specific DNA binding transcription factor activity // sequence-specific DNA binding // sequence-specific DNA binding transcription factor activity // sequence-specific DNA binding // sequence-specific DNA binding transcription factor activity // sequence-specific DNA binding // sequence-specific DNA binding transcription factor activity // sequence-specific DNA binding // sequence-specif…	inferred from electronic annotation // inferred from electronic annotation // inferred from electronic annotation // inferred from electronic annotation // inferred from electronic annotation // inferred from electronic annotation // inferred from electronic annotation // inferred from electronic annotation // inferred from electronic annotation // inferred from electronic annotation // inferred …	---	---	---	---	---	main					5.32671	5.37401	5.64259	2.34426	2.24926	2.56544
17015331	F13A1	coagulation factor XIII, A1 polypeptide	coding	< 1e-07	< 1e-07	30.45	244.72	8.33333	up	NM_000129	RefSeq	Homo sapiens coagulation factor XIII, A1 polypeptide (F13A1), mRNA.	chr6	-	6144311	6321246	GO:0007596 // GO:0018149 // GO:0007596 // GO:0018149 // GO:0007596 // GO:0018149 // GO:0042060 // GO:0007596 // GO:0018149 // GO:0007596 // GO:0018149 // GO:0018149 // GO:0007596 // GO:0018149 // GO:0018149 // GO:0007596 // GO:0018149 // GO:0018149	blood coagulation // peptide cross-linking // blood coagulation // peptide cross-linking // blood coagulation // peptide cross-linking // wound healing // blood coagulation // peptide cross-linking // blood coagulation // peptide cross-linking // peptide cross-linking // blood coagulation // peptide cross-linking // peptide cross-linking // blood coagulation // peptide cross-linking // peptide cr…	inferred from electronic annotation // inferred from electronic annotation // inferred from electronic annotation // inferred from electronic annotation // --- // --- // --- // inferred from electronic annotation // inferred from electronic annotation // inferred from electronic annotation // inferred from electronic annotation // --- // inferred from electronic annotation // inferred from electr…	GO:0005576 // GO:0005737 // GO:0005576 // GO:0005737 // GO:0005737 // GO:0005576 // GO:0005576 // GO:0005737 // GO:0005576 // GO:0005737 // GO:0005576 // GO:0005737 // GO:0005576 // GO:0005737	extracellular region // cytoplasm // extracellular region // cytoplasm // cytoplasm // extracellular region // extracellular region // cytoplasm // extracellular region // cytoplasm // extracellular region // cytoplasm // extracellular region // cytoplasm	not recorded // inferred from electronic annotation // not recorded // inferred from electronic annotation // --- // --- // not recorded // inferred from electronic annotation // not recorded // inferred from electronic annotation // not recorded // inferred from electronic annotation // not recorded // inferred from electronic annotation	GO:0003810 // GO:0008415 // GO:0016740 // GO:0046872 // GO:0003810 // GO:0008415 // GO:0016740 // GO:0046872 // GO:0008415 // GO:0003810 // GO:0046872 // GO:0016740 // GO:0003810 // GO:0008415 // GO:0016740 // GO:0046872 // GO:0003810 // GO:0008415 // GO:0016740 // GO:0046872 // GO:0003810 // GO:0008415 // GO:0016740 // GO:0046872 // GO:0003810 // GO:0008415 // GO:0016740 // GO:0046872	protein-glutamine gamma-glutamyltransferase activity // acyltransferase activity // transferase activity // metal ion binding // protein-glutamine gamma-glutamyltransferase activity // acyltransferase activity // transferase activity // metal ion binding // acyltransferase activity // protein-glutamine gamma-glutamyltransferase activity // metal ion binding // transferase activity // protein-glut…	inferred from electronic annotation // inferred from electronic annotation // inferred from electronic annotation // inferred from electronic annotation // inferred from electronic annotation // inferred from electronic annotation // inferred from electronic annotation // inferred from electronic annotation // --- // --- // --- // --- // inferred from electronic annotation // inferred from electr…	---	---	---	---	---	main					7.88351	7.98459	7.94497	4.96912	4.51237	5.25927
17057143	PGAM2	phosphoglycerate mutase 2 (muscle)	coding	< 1e-07	< 1e-07	8.01	69.43	8.33333	up	NM_000290	RefSeq	Homo sapiens phosphoglycerate mutase 2 (muscle) (PGAM2), mRNA.	chr7	-	44102326	44105186	GO:0006094 // GO:0006096 // GO:0006941 // GO:0007283 // GO:0010035 // GO:0046689 // GO:0006094 // GO:0006096 // GO:0006941 // GO:0007283 // GO:0010035 // GO:0046689 // GO:0006096 // GO:0006094 // GO:0006941 // GO:0010035 // GO:0007283 // GO:0046689 // GO:0006094 // GO:0006096 // GO:0006941 // GO:0007283 // GO:0010035 // GO:0046689 // GO:0006094 // GO:0006096 // GO:0006941 // GO:0007283 // GO:0010…	gluconeogenesis // glycolysis // striated muscle contraction // spermatogenesis // response to inorganic substance // response to mercury ion // gluconeogenesis // glycolysis // striated muscle contraction // spermatogenesis // response to inorganic substance // response to mercury ion // glycolysis // gluconeogenesis // striated muscle contraction // response to inorganic substance // spermatoge…	inferred from electronic annotation // inferred from mutant phenotype // inferred from mutant phenotype // inferred from electronic annotation // inferred from electronic annotation // inferred from electronic annotation // inferred from electronic annotation // inferred from mutant phenotype // inferred from mutant phenotype // inferred from electronic annotation // inferred from electronic anno…	GO:0005575 // GO:0005625 // GO:0005634 // GO:0005829 // GO:0005575 // GO:0005625 // GO:0005634 // GO:0005829 // GO:0005575 // GO:0005634 // GO:0005625 // GO:0005829 // GO:0005575 // GO:0005625 // GO:0005634 // GO:0005829 // GO:0005575 // GO:0005625 // GO:0005634 // GO:0005829	cellular_component // soluble fraction // nucleus // cytosol // cellular_component // soluble fraction // nucleus // cytosol // cellular_component // nucleus // soluble fraction // cytosol // cellular_component // soluble fraction // nucleus // cytosol // cellular_component // soluble fraction // nucleus // cytosol	no biological data available // inferred from electronic annotation // inferred from electronic annotation // inferred from electronic annotation // no biological data available // inferred from electronic annotation // inferred from electronic annotation // inferred from electronic annotation // --- // --- // --- // --- // no biological data available // inferred from electronic annotation // in…	GO:0004082 // GO:0004083 // GO:0004619 // GO:0016787 // GO:0016853 // GO:0046538 // GO:0048037 // GO:0004082 // GO:0004083 // GO:0004619 // GO:0016787 // GO:0016853 // GO:0046538 // GO:0048037 // GO:0004619 // GO:0048037 // GO:0004082 // GO:0016853 // GO:0004083 // GO:0046538 // GO:0016787 // GO:0016868 // GO:0004082 // GO:0004083 // GO:0004619 // GO:0016787 // GO:0016853 // GO:0046538 // GO:0048…	bisphosphoglycerate mutase activity // 2,3-bisphospho-D-glycerate 2-phosphohydrolase activity // phosphoglycerate mutase activity // hydrolase activity // isomerase activity // 2,3-bisphosphoglycerate-dependent phosphoglycerate mutase activity // cofactor binding // bisphosphoglycerate mutase activity // 2,3-bisphospho-D-glycerate 2-phosphohydrolase activity // phosphoglycerate mutase activity //…	inferred from electronic annotation // inferred from electronic annotation // inferred from mutant phenotype // inferred from electronic annotation // inferred from electronic annotation // inferred from electronic annotation // inferred from electronic annotation // inferred from electronic annotation // inferred from electronic annotation // inferred from mutant phenotype // inferred from elect…	GenMAPP	Glycolysis_and_Gluconeogenesis	---	---	---	main					6.23922	6.08494	6.03618	3.19703	2.93543	2.82814
17025576	T	T, brachyury homolog (mouse)	coding	< 1e-07	< 1e-07	10.01	82.01	8.33333	up	NM_003181	RefSeq	Homo sapiens T, brachyury homolog (mouse) (T), mRNA.	chr6	-	166571086	166582188	GO:0001570 // GO:0001756 // GO:0001839 // GO:0001843 // GO:0006355 // GO:0007165 // GO:0007275 // GO:0007498 // GO:0008284 // GO:0008595 // GO:0009653 // GO:0030903 // GO:0045944 // GO:0060395 // GO:0090009 // GO:0001570 // GO:0001756 // GO:0001839 // GO:0001843 // GO:0006355 // GO:0007165 // GO:0007275 // GO:0007498 // GO:0008284 // GO:0008595 // GO:0009653 // GO:0030903 // GO:0045944 // GO:0060…	vasculogenesis // somitogenesis // neural plate morphogenesis // neural tube closure // regulation of transcription, DNA-dependent // signal transduction // multicellular organismal development // mesoderm development // positive regulation of cell proliferation // anterior/posterior axis specification, embryo // anatomical structure morphogenesis // notochord development // positive regulation o…	inferred from electronic annotation // inferred from electronic annotation // inferred from electronic annotation // inferred from electronic annotation // inferred from electronic annotation // non-traceable author statement // inferred from electronic annotation // traceable author statement // inferred from electronic annotation // traceable author statement // inferred from electronic annotat…	GO:0005634 // GO:0005737 // GO:0005634 // GO:0005737 // GO:0005634 // GO:0005737 // GO:0005634 // GO:0005737 // GO:0005634 // GO:0005737 // GO:0005634 // GO:0005737 // GO:0005634 // GO:0005737 // GO:0005634	nucleus // cytoplasm // nucleus // cytoplasm // nucleus // cytoplasm // nucleus // cytoplasm // nucleus // cytoplasm // nucleus // cytoplasm // nucleus // cytoplasm // nucleus	inferred from electronic annotation // inferred from electronic annotation // inferred from electronic annotation // inferred from electronic annotation // --- // --- // inferred from electronic annotation // inferred from electronic annotation // --- // --- // inferred from electronic annotation // inferred from electronic annotation // inferred from electronic annotation // inferred from electr…	GO:0003700 // GO:0005515 // GO:0043565 // GO:0003700 // GO:0005515 // GO:0043565 // GO:0003700 // GO:0005515 // GO:0043565 // GO:0003700 // GO:0005515 // GO:0043565 // GO:0003700 // GO:0005515 // GO:0043565 // GO:0003700 // GO:0005515 // GO:0043565 // GO:0003700 // GO:0005515 // GO:0043565 // GO:0003700	sequence-specific DNA binding transcription factor activity // protein binding // sequence-specific DNA binding // sequence-specific DNA binding transcription factor activity // protein binding // sequence-specific DNA binding // sequence-specific DNA binding transcription factor activity // protein binding // sequence-specific DNA binding // sequence-specific DNA binding transcription factor act…	inferred from electronic annotation // inferred from electronic annotation // inferred from electronic annotation // inferred from electronic annotation // inferred from electronic annotation // inferred from electronic annotation // --- // --- // --- // inferred from electronic annotation // inferred from electronic annotation // inferred from electronic annotation // --- // --- // --- // inferr…	---	---	---	---	---	main					6.18892	6.72687	6.16562	3.37523	3.62249	2.92921
17102607	TSPAN7	tetraspanin 7	coding	< 1e-07	< 1e-07	3.95	34.32	8.33333	up	NM_004615	RefSeq	Homo sapiens tetraspanin 7 (TSPAN7), mRNA.	chrX	+	38420623	38548172	---	---	---	GO:0005887 // GO:0016020 // GO:0005887 // GO:0016020 // GO:0016020 // GO:0005887 // GO:0016021 // GO:0005887 // GO:0016020 // GO:0005887 // GO:0016020 // GO:0005887 // GO:0016020 // GO:0016021 // GO:0005887 // GO:0016020 // GO:0005887 // GO:0016020	integral to plasma membrane // membrane // integral to plasma membrane // membrane // membrane // integral to plasma membrane // integral to membrane // integral to plasma membrane // membrane // integral to plasma membrane // membrane // integral to plasma membrane // membrane // integral to membrane // integral to plasma membrane // membrane // integral to plasma membrane // membrane	traceable author statement // inferred from electronic annotation // traceable author statement // inferred from electronic annotation // --- // --- // --- // traceable author statement // inferred from electronic annotation // traceable author statement // inferred from electronic annotation // traceable author statement // inferred from electronic annotation // --- // traceable author statement…	---	---	---	---	---	---	---	---	main					5.42052	4.98205	4.90802	1.98286	1.91976	1.99995
16826738	MT1G	metallothionein 1G	coding	< 1e-07	< 1e-07	5.16	39.35	7.69231	up	NM_005950	RefSeq	Homo sapiens metallothionein 1G (MT1G), mRNA.	chr16	-	56700647	56701977	---	---	---	---	---	---	GO:0005515 // GO:0046872 // GO:0005515 // GO:0046872 // GO:0046872 // GO:0046872 // GO:0005515	protein binding // metal ion binding // protein binding // metal ion binding // metal ion binding // metal ion binding // protein binding	inferred from physical interaction // inferred from electronic annotation // inferred from physical interaction // inferred from electronic annotation // --- // --- // ---	---	---	---	---	---	main					5.35377	5.17222	5.37663	2.78975	2.08473	2.18419
16743104	RAB38	RAB38, member RAS oncogene family	coding	< 1e-07	< 1e-07	7.46	55.56	7.69231	up	NM_022337	RefSeq	Homo sapiens RAB38, member RAS oncogene family (RAB38), mRNA.	chr11	-	87846415	87908635	GO:0007264 // GO:0015031 // GO:0007264 // GO:0015031 // GO:0007264 // GO:0015031 // GO:0006886 // GO:0006913 // GO:0007165 // GO:0006468 // GO:0007264 // GO:0015031 // GO:0007264 // GO:0015031 // GO:0006886 // GO:0006913 // GO:0007165 // GO:0007264 // GO:0015031 // GO:0006468 // GO:0006996	small GTPase mediated signal transduction // protein transport // small GTPase mediated signal transduction // protein transport // small GTPase mediated signal transduction // protein transport // intracellular protein transport // nucleocytoplasmic transport // signal transduction // protein amino acid phosphorylation // small GTPase mediated signal transduction // protein transport // small GT…	non-traceable author statement // non-traceable author statement // non-traceable author statement // non-traceable author statement // --- // --- // --- // --- // --- // --- // non-traceable author statement // non-traceable author statement // non-traceable author statement // non-traceable author statement // --- // --- // --- // --- // --- // --- // ---	GO:0005575 // GO:0005886 // GO:0042470 // GO:0005575 // GO:0005886 // GO:0042470 // GO:0005575 // GO:0042470 // GO:0005886 // GO:0005622 // GO:0005575 // GO:0005886 // GO:0042470 // GO:0005575 // GO:0005886 // GO:0042470 // GO:0005622 // GO:0005794 // GO:0005737 // GO:0005783 // GO:0005625 // GO:0005829 // GO:0042598 // GO:0005626	cellular_component // plasma membrane // melanosome // cellular_component // plasma membrane // melanosome // cellular_component // melanosome // plasma membrane // intracellular // cellular_component // plasma membrane // melanosome // cellular_component // plasma membrane // melanosome // intracellular // Golgi apparatus // cytoplasm // endoplasmic reticulum // soluble fraction // cytosol // ve…	no biological data available // inferred from electronic annotation // inferred from electronic annotation // no biological data available // inferred from electronic annotation // inferred from electronic annotation // --- // --- // --- // --- // no biological data available // inferred from electronic annotation // inferred from electronic annotation // no biological data available // inferred …	GO:0000166 // GO:0003924 // GO:0005525 // GO:0000166 // GO:0003924 // GO:0005525 // GO:0005525 // GO:0000166 // GO:0003924 // GO:0005515 // GO:0004672 // GO:0005524 // GO:0000166 // GO:0003924 // GO:0005525 // GO:0000166 // GO:0003924 // GO:0005525 // GO:0003924 // GO:0005515 // GO:0005525 // GO:0004672 // GO:0005524	nucleotide binding // GTPase activity // GTP binding // nucleotide binding // GTPase activity // GTP binding // GTP binding // nucleotide binding // GTPase activity // protein binding // protein kinase activity // ATP binding // nucleotide binding // GTPase activity // GTP binding // nucleotide binding // GTPase activity // GTP binding // GTPase activity // protein binding // GTP binding // prote…	inferred from electronic annotation // non-traceable author statement // non-traceable author statement // inferred from electronic annotation // non-traceable author statement // non-traceable author statement // --- // --- // --- // --- // --- // --- // inferred from electronic annotation // non-traceable author statement // non-traceable author statement // inferred from electronic annotation …	---	---	---	---	---	main					5.89656	5.72318	5.7763	2.87403	3.01064	2.76564
16978054	UNC5C	unc-5 homolog C (C. elegans)	coding	< 1e-07	< 1e-07	4	31.46	7.69231	up	NM_003728	RefSeq	Homo sapiens unc-5 homolog C (C. elegans) (UNC5C), mRNA.	chr4	-	96083655	96470361	GO:0006915 // GO:0007165 // GO:0007275 // GO:0007411 // GO:0007420 // GO:0030334 // GO:0006915 // GO:0007165 // GO:0007275 // GO:0007411 // GO:0007420 // GO:0030334 // GO:0030334 // GO:0007411 // GO:0006915 // GO:0007275 // GO:0007165 // GO:0007420 // GO:0006915 // GO:0007165 // GO:0007275 // GO:0007411 // GO:0007420 // GO:0030334 // GO:0006915 // GO:0007165 // GO:0007275 // GO:0007411 // GO:0007…	apoptosis // signal transduction // multicellular organismal development // axon guidance // brain development // regulation of cell migration // apoptosis // signal transduction // multicellular organismal development // axon guidance // brain development // regulation of cell migration // regulation of cell migration // axon guidance // apoptosis // multicellular organismal development // signa…	inferred from electronic annotation // inferred from electronic annotation // inferred from electronic annotation // traceable author statement // inferred from electronic annotation // inferred from electronic annotation // inferred from electronic annotation // inferred from electronic annotation // inferred from electronic annotation // traceable author statement // inferred from electronic an…	GO:0016020 // GO:0016021 // GO:0016020 // GO:0016021 // GO:0016021 // GO:0016020 // GO:0016020 // GO:0016021 // GO:0016020 // GO:0016021 // GO:0016020 // GO:0016021	membrane // integral to membrane // membrane // integral to membrane // integral to membrane // membrane // membrane // integral to membrane // membrane // integral to membrane // membrane // integral to membrane	inferred from electronic annotation // inferred from electronic annotation // inferred from electronic annotation // inferred from electronic annotation // --- // --- // inferred from electronic annotation // inferred from electronic annotation // inferred from electronic annotation // inferred from electronic annotation // inferred from electronic annotation // inferred from electronic annotation	GO:0004872 // GO:0005042 // GO:0005515 // GO:0004872 // GO:0005042 // GO:0005515 // GO:0005042 // GO:0004872 // GO:0005515 // GO:0004872 // GO:0005042 // GO:0005515 // GO:0004872 // GO:0005042 // GO:0005515 // GO:0004872 // GO:0005042 // GO:0005515 // GO:0005515	receptor activity // netrin receptor activity // protein binding // receptor activity // netrin receptor activity // protein binding // netrin receptor activity // receptor activity // protein binding // receptor activity // netrin receptor activity // protein binding // receptor activity // netrin receptor activity // protein binding // receptor activity // netrin receptor activity // protein bi…	inferred from electronic annotation // inferred from electronic annotation // inferred from electronic annotation // inferred from electronic annotation // inferred from electronic annotation // inferred from electronic annotation // --- // --- // --- // inferred from electronic annotation // inferred from electronic annotation // inferred from electronic annotation // inferred from electronic an…	---	---	Pfam	IPR013106	Immunoglobulin V-set	main					5.12286	4.5453	5.26599	2.05818	2.10347	1.78925
16883921	C2orf40	chromosome 2 open reading frame 40	coding	1.0E-7	2.22E-5	26.5	183.19	7.14286	up	NM_032411	RefSeq	Homo sapiens chromosome 2 open reading frame 40 (C2orf40), mRNA.	chr2	+	106679702	106694615	---	---	---	GO:0005576 // GO:0005634 // GO:0030133 // GO:0031410 // GO:0043231 // GO:0005576 // GO:0005634 // GO:0030133 // GO:0031410 // GO:0043231 // GO:0005576 // GO:0043231 // GO:0031410 // GO:0030133 // GO:0005634 // GO:0005576 // GO:0005634 // GO:0030133 // GO:0031410 // GO:0043231	extracellular region // nucleus // transport vesicle // cytoplasmic vesicle // intracellular membrane-bounded organelle // extracellular region // nucleus // transport vesicle // cytoplasmic vesicle // intracellular membrane-bounded organelle // extracellular region // intracellular membrane-bounded organelle // cytoplasmic vesicle // transport vesicle // nucleus // extracellular region // nucleu…	inferred from electronic annotation // inferred from direct assay // inferred from electronic annotation // inferred from electronic annotation // inferred from direct assay // inferred from electronic annotation // inferred from direct assay // inferred from electronic annotation // inferred from electronic annotation // inferred from direct assay // --- // --- // --- // --- // --- // inferred f…	---	---	---	---	---	---	---	---	main					7.999	7.21418	7.34658	4.83347	4.87723	4.42915
16743816	PDGFD	platelet derived growth factor D	coding	< 1e-07	< 1e-07	40.6	280.76	7.14286	up	NM_025208	RefSeq	Homo sapiens platelet derived growth factor D (PDGFD), transcript variant 1, mRNA.	chr11	-	103777914	104035107	GO:0050730 // GO:0051781 // GO:0050730 // GO:0051781 // GO:0050730 // GO:0051781 // GO:0050730 // GO:0051781 // GO:0050730 // GO:0051781 // GO:0050730 // GO:0051781	regulation of peptidyl-tyrosine phosphorylation // positive regulation of cell division // regulation of peptidyl-tyrosine phosphorylation // positive regulation of cell division // regulation of peptidyl-tyrosine phosphorylation // positive regulation of cell division // regulation of peptidyl-tyrosine phosphorylation // positive regulation of cell division // regulation of peptidyl-tyrosine pho…	inferred from electronic annotation // inferred from electronic annotation // inferred from electronic annotation // inferred from electronic annotation // inferred from electronic annotation // inferred from electronic annotation // --- // --- // inferred from electronic annotation // inferred from electronic annotation // inferred from electronic annotation // inferred from electronic annotation	GO:0000139 // GO:0005576 // GO:0016020 // GO:0000139 // GO:0005576 // GO:0016020 // GO:0000139 // GO:0005576 // GO:0016020 // GO:0016020 // GO:0005576 // GO:0000139 // GO:0000139 // GO:0005576 // GO:0016020 // GO:0016020 // GO:0000139 // GO:0005576 // GO:0016020	Golgi membrane // extracellular region // membrane // Golgi membrane // extracellular region // membrane // Golgi membrane // extracellular region // membrane // membrane // extracellular region // Golgi membrane // Golgi membrane // extracellular region // membrane // membrane // Golgi membrane // extracellular region // membrane	not recorded // not recorded // inferred from electronic annotation // not recorded // not recorded // inferred from electronic annotation // not recorded // not recorded // inferred from electronic annotation // --- // --- // --- // not recorded // not recorded // inferred from electronic annotation // --- // not recorded // not recorded // inferred from electronic annotation	GO:0008083 // GO:0008083 // GO:0008083 // GO:0008083 // GO:0008083 // GO:0008083 // GO:0008083	growth factor activity // growth factor activity // growth factor activity // growth factor activity // growth factor activity // growth factor activity // growth factor activity	inferred from electronic annotation // inferred from electronic annotation // inferred from electronic annotation // --- // inferred from electronic annotation // --- // inferred from electronic annotation	---	---	Pfam // Pfam	IPR000072 // IPR000072	Platelet-derived growth factor (PDGF) // Platelet-derived growth factor (PDGF)	main					8.15622	7.99167	8.25983	5.23283	5.24188	5.51108
16837418	SOX9	SRY (sex determining region Y)-box 9	coding	< 1e-07	< 1e-07	23.95	167.83	7.14286	up	NM_000346	RefSeq	Homo sapiens SRY (sex determining region Y)-box 9 (SOX9), mRNA.	chr17	+	70117161	70122561	GO:0001502 // GO:0001708 // GO:0001837 // GO:0001942 // GO:0006357 // GO:0007283 // GO:0007507 // GO:0008584 // GO:0010628 // GO:0014032 // GO:0019100 // GO:0030502 // GO:0032331 // GO:0042127 // GO:0042981 // GO:0045662 // GO:0045892 // GO:0045944 // GO:0048709 // GO:0060009 // GO:0060350 // GO:0060512 // GO:0060517 // GO:0001502 // GO:0001708 // GO:0001837 // GO:0001942 // GO:0006357 // GO:0007…	cartilage condensation // cell fate specification // epithelial to mesenchymal transition // hair follicle development // regulation of transcription from RNA polymerase II promoter // spermatogenesis // heart development // male gonad development // positive regulation of gene expression // neural crest cell development // male germ-line sex determination // negative regulation of bone mineraliz…	inferred from electronic annotation // inferred from electronic annotation // inferred from electronic annotation // inferred from electronic annotation // traceable author statement // inferred from electronic annotation // inferred from electronic annotation // inferred from expression pattern // inferred from electronic annotation // inferred from electronic annotation // inferred from electro…	GO:0005634 // GO:0005730 // GO:0005634 // GO:0005730 // GO:0005634 // GO:0005634 // GO:0005730 // GO:0005634 // GO:0005730 // GO:0005634	nucleus // nucleolus // nucleus // nucleolus // nucleus // nucleus // nucleolus // nucleus // nucleolus // nucleus	inferred from direct assay // inferred from direct assay // inferred from direct assay // inferred from direct assay // --- // inferred from direct assay // inferred from direct assay // inferred from direct assay // inferred from direct assay // ---	GO:0003700 // GO:0003702 // GO:0003704 // GO:0005515 // GO:0010843 // GO:0016563 // GO:0003700 // GO:0003702 // GO:0003704 // GO:0005515 // GO:0010843 // GO:0016563 // GO:0003700 // GO:0005515 // GO:0003704 // GO:0003702 // GO:0016563 // GO:0010843 // GO:0003677 // GO:0043565 // GO:0003700 // GO:0003700 // GO:0003702 // GO:0003704 // GO:0005515 // GO:0010843 // GO:0016563 // GO:0003700 // GO:0003…	sequence-specific DNA binding transcription factor activity // RNA polymerase II transcription factor activity // specific RNA polymerase II transcription factor activity // protein binding // promoter binding // transcription activator activity // sequence-specific DNA binding transcription factor activity // RNA polymerase II transcription factor activity // specific RNA polymerase II transcrip…	inferred from electronic annotation // traceable author statement // traceable author statement // inferred from electronic annotation // inferred from electronic annotation // inferred from electronic annotation // inferred from electronic annotation // traceable author statement // traceable author statement // inferred from electronic annotation // inferred from electronic annotation // inferr…	---	---	---	---	---	main					7.55812	7.22224	7.4005	4.6543	4.48311	4.56415
17056246	TRIL	TLR4 interactor with leucine-rich repeats	coding	< 1e-07	< 1e-07	4.3	30.17	7.14286	up	NM_014817	RefSeq	Homo sapiens TLR4 interactor with leucine-rich repeats (TRIL), mRNA.	chr7	-	28992974	28998029	GO:0002718 // GO:0006954 // GO:0034142 // GO:0045087 // GO:0002718 // GO:0006954 // GO:0034142 // GO:0045087	regulation of cytokine production involved in immune response // inflammatory response // toll-like receptor 4 signaling pathway // innate immune response // regulation of cytokine production involved in immune response // inflammatory response // toll-like receptor 4 signaling pathway // innate immune response	inferred from direct assay // inferred from electronic annotation // inferred from direct assay // inferred from electronic annotation // inferred from direct assay // inferred from electronic annotation // inferred from direct assay // inferred from electronic annotation	GO:0016020 // GO:0046696 // GO:0016020 // GO:0046696	membrane // lipopolysaccharide receptor complex // membrane // lipopolysaccharide receptor complex	inferred from electronic annotation // inferred from direct assay // inferred from electronic annotation // inferred from direct assay	GO:0001530 // GO:0005515 // GO:0001530 // GO:0005515	lipopolysaccharide binding // protein binding // lipopolysaccharide binding // protein binding	inferred from direct assay // inferred from electronic annotation // inferred from direct assay // inferred from electronic annotation	---	---	---	---	---	main				ENST00000425873	5.09878	4.67602	4.97891	2.37962	1.90766	1.98547
16827022	CDH8	cadherin 8, type 2	coding	< 1e-07	< 1e-07	5.22	34.9	6.66667	up	NM_001796	RefSeq	Homo sapiens cadherin 8, type 2 (CDH8), mRNA.	chr16	-	61685915	62070739	GO:0007155 // GO:0007156 // GO:0007155 // GO:0007156 // GO:0007155 // GO:0007156 // GO:0007155 // GO:0007156 // GO:0007155 // GO:0007156 // GO:0007156 // GO:0007155 // GO:0007155 // GO:0007156 // GO:0007156 // GO:0007155	cell adhesion // homophilic cell adhesion // cell adhesion // homophilic cell adhesion // cell adhesion // homophilic cell adhesion // cell adhesion // homophilic cell adhesion // cell adhesion // homophilic cell adhesion // homophilic cell adhesion // cell adhesion // cell adhesion // homophilic cell adhesion // homophilic cell adhesion // cell adhesion	inferred from electronic annotation // inferred from electronic annotation // inferred from electronic annotation // inferred from electronic annotation // --- // --- // inferred from electronic annotation // inferred from electronic annotation // inferred from electronic annotation // inferred from electronic annotation // --- // --- // inferred from electronic annotation // inferred from electr…	GO:0005886 // GO:0016021 // GO:0005886 // GO:0016021 // GO:0005886 // GO:0016021 // GO:0016020 // GO:0005886 // GO:0016021 // GO:0005886 // GO:0016021 // GO:0016020 // GO:0005886 // GO:0005886 // GO:0016021 // GO:0016020 // GO:0005886	plasma membrane // integral to membrane // plasma membrane // integral to membrane // plasma membrane // integral to membrane // membrane // plasma membrane // integral to membrane // plasma membrane // integral to membrane // membrane // plasma membrane // plasma membrane // integral to membrane // membrane // plasma membrane	not recorded // inferred from electronic annotation // not recorded // inferred from electronic annotation // --- // --- // --- // not recorded // inferred from electronic annotation // not recorded // inferred from electronic annotation // --- // --- // not recorded // inferred from electronic annotation // --- // ---	GO:0005509 // GO:0005509 // GO:0005509 // GO:0005509 // GO:0005509 // GO:0005509 // GO:0005509 // GO:0005509	calcium ion binding // calcium ion binding // calcium ion binding // calcium ion binding // calcium ion binding // calcium ion binding // calcium ion binding // calcium ion binding	inferred from electronic annotation // inferred from electronic annotation // --- // inferred from electronic annotation // inferred from electronic annotation // --- // inferred from electronic annotation // ---	---	---	---	---	---	main					5.27467	4.84574	5.26343	2.50957	2.26778	2.33249
17105332	SRPX2	sushi-repeat-containing protein, X-linked 2	coding	< 1e-07	< 1e-07	72.17	486.26	6.66667	up	NM_014467	RefSeq	Homo sapiens sushi-repeat-containing protein, X-linked 2 (SRPX2), mRNA.	chrX	+	99899163	99926296	GO:0001525 // GO:0016337 // GO:0042325 // GO:0048870 // GO:0090050 // GO:0001525 // GO:0016337 // GO:0042325 // GO:0048870 // GO:0090050 // GO:0042325 // GO:0090050 // GO:0048870 // GO:0001525 // GO:0016337 // GO:0001525 // GO:0016337 // GO:0042325 // GO:0048870 // GO:0090050	angiogenesis // cell-cell adhesion // regulation of phosphorylation // cell motility // positive regulation of cell migration involved in sprouting angiogenesis // angiogenesis // cell-cell adhesion // regulation of phosphorylation // cell motility // positive regulation of cell migration involved in sprouting angiogenesis // regulation of phosphorylation // positive regulation of cell migration …	inferred from electronic annotation // inferred from direct assay // inferred from direct assay // inferred from direct assay // inferred from sequence or structural similarity // inferred from electronic annotation // inferred from direct assay // inferred from direct assay // inferred from direct assay // inferred from sequence or structural similarity // --- // --- // --- // --- // --- // infe…	GO:0005576 // GO:0005737 // GO:0005576 // GO:0005737 // GO:0005737 // GO:0005576 // GO:0005576 // GO:0005737	extracellular region // cytoplasm // extracellular region // cytoplasm // cytoplasm // extracellular region // extracellular region // cytoplasm	inferred from electronic annotation // inferred from direct assay // inferred from electronic annotation // inferred from direct assay // --- // --- // inferred from electronic annotation // inferred from direct assay	GO:0005102 // GO:0005515 // GO:0005102 // GO:0005515 // GO:0005515 // GO:0005102 // GO:0005102 // GO:0005515	receptor binding // protein binding // receptor binding // protein binding // protein binding // receptor binding // receptor binding // protein binding	inferred from physical interaction // inferred from physical interaction // inferred from physical interaction // inferred from physical interaction // --- // --- // inferred from physical interaction // inferred from physical interaction	---	---	---	---	---	main					9.02007	8.83252	8.93236	6.18956	6.01717	6.2684
17053804	DPP6	dipeptidyl-peptidase 6	coding	< 1e-07	< 1e-07	3.82	23.69	6.25	up	NM_001039350	RefSeq	Homo sapiens dipeptidyl-peptidase 6 (DPP6), transcript variant 3, mRNA.	chr7	+	153584182	154685995	GO:0006508 // GO:0008219 // GO:0006508 // GO:0008219 // GO:0006508 // GO:0008219 // GO:0006508 // GO:0008219 // GO:0006508 // GO:0006508 // GO:0008219 // GO:0006508 // GO:0008219 // GO:0006508 // GO:0008219 // GO:0006508 // GO:0008219 // GO:0006508	proteolysis // cell death // proteolysis // cell death // proteolysis // cell death // proteolysis // cell death // proteolysis // proteolysis // cell death // proteolysis // cell death // proteolysis // cell death // proteolysis // cell death // proteolysis	inferred from electronic annotation // inferred from electronic annotation // inferred from electronic annotation // inferred from electronic annotation // inferred from electronic annotation // inferred from electronic annotation // inferred from electronic annotation // inferred from electronic annotation // --- // inferred from electronic annotation // inferred from electronic annotation // --…	GO:0016020 // GO:0016021 // GO:0016020 // GO:0016021 // GO:0016020 // GO:0016021 // GO:0016020 // GO:0016021 // GO:0016020 // GO:0016020 // GO:0016021 // GO:0016020 // GO:0016021 // GO:0016020 // GO:0016021 // GO:0016020 // GO:0016021 // GO:0016020	membrane // integral to membrane // membrane // integral to membrane // membrane // integral to membrane // membrane // integral to membrane // membrane // membrane // integral to membrane // membrane // integral to membrane // membrane // integral to membrane // membrane // integral to membrane // membrane	inferred from electronic annotation // inferred from electronic annotation // inferred from electronic annotation // inferred from electronic annotation // inferred from electronic annotation // inferred from electronic annotation // inferred from electronic annotation // inferred from electronic annotation // --- // inferred from electronic annotation // inferred from electronic annotation // --…	GO:0008239 // GO:0008239 // GO:0008239 // GO:0008239 // GO:0008236 // GO:0008239 // GO:0008239 // GO:0008236 // GO:0008239 // GO:0008239 // GO:0008236	dipeptidyl-peptidase activity // dipeptidyl-peptidase activity // dipeptidyl-peptidase activity // dipeptidyl-peptidase activity // serine-type peptidase activity // dipeptidyl-peptidase activity // dipeptidyl-peptidase activity // serine-type peptidase activity // dipeptidyl-peptidase activity // dipeptidyl-peptidase activity // serine-type peptidase activity	traceable author statement // traceable author statement // traceable author statement // traceable author statement // --- // traceable author statement // --- // --- // traceable author statement // traceable author statement // ---	---	---	Pfam	IPR011659	WD40-like Beta Propeller	main				ENST00000366161 ENST00000448767	4.39411	4.46835	4.84483	2.02617	1.9395	1.78732
16844775	KRT19	keratin 19	coding	< 1e-07	< 1e-07	32.14	196.46	6.25	up	NM_002276	RefSeq	Homo sapiens keratin 19 (KRT19), mRNA.	chr17	-	39679869	39684641	GO:0043627 // GO:0044419 // GO:0045214 // GO:0060706 // GO:0043627 // GO:0044419 // GO:0045214 // GO:0060706 // GO:0060706 // GO:0044419 // GO:0045214 // GO:0043627 // GO:0043627 // GO:0044419 // GO:0045214 // GO:0060706 // GO:0043627 // GO:0044419 // GO:0045214 // GO:0060706	response to estrogen stimulus // interspecies interaction between organisms // sarcomere organization // cell differentiation involved in embryonic placenta development // response to estrogen stimulus // interspecies interaction between organisms // sarcomere organization // cell differentiation involved in embryonic placenta development // cell differentiation involved in embryonic placenta dev…	inferred from expression pattern // inferred from electronic annotation // inferred from direct assay // inferred from electronic annotation // inferred from expression pattern // inferred from electronic annotation // inferred from direct assay // inferred from electronic annotation // --- // --- // --- // --- // inferred from expression pattern // inferred from electronic annotation // inferred…	GO:0005882 // GO:0030018 // GO:0042383 // GO:0043034 // GO:0005882 // GO:0030018 // GO:0042383 // GO:0043034 // GO:0042383 // GO:0005882 // GO:0043034 // GO:0030018 // GO:0005882 // GO:0030018 // GO:0042383 // GO:0043034 // GO:0005882 // GO:0030018 // GO:0042383 // GO:0043034	intermediate filament // Z disc // sarcolemma // costamere // intermediate filament // Z disc // sarcolemma // costamere // sarcolemma // intermediate filament // costamere // Z disc // intermediate filament // Z disc // sarcolemma // costamere // intermediate filament // Z disc // sarcolemma // costamere	inferred from electronic annotation // inferred from electronic annotation // inferred from electronic annotation // inferred from direct assay // inferred from electronic annotation // inferred from electronic annotation // inferred from electronic annotation // inferred from direct assay // --- // --- // --- // --- // inferred from electronic annotation // inferred from electronic annotation //…	GO:0005200 // GO:0005515 // GO:0008307 // GO:0005200 // GO:0005515 // GO:0008307 // GO:0005200 // GO:0008307 // GO:0005515 // GO:0005200 // GO:0005515 // GO:0008307 // GO:0005200 // GO:0005515 // GO:0008307	structural constituent of cytoskeleton // protein binding // structural constituent of muscle // structural constituent of cytoskeleton // protein binding // structural constituent of muscle // structural constituent of cytoskeleton // structural constituent of muscle // protein binding // structural constituent of cytoskeleton // protein binding // structural constituent of muscle // structural …	traceable author statement // inferred from physical interaction // inferred from direct assay // traceable author statement // inferred from physical interaction // inferred from direct assay // --- // --- // --- // traceable author statement // inferred from physical interaction // inferred from direct assay // traceable author statement // inferred from physical interaction // inferred from di…	---	---	---	---	---	main					7.63336	7.64812	7.58085	5.01148	4.94883	5.01351
16731297	NCAM1	neural cell adhesion molecule 1	coding	2.3E-6	2.35E-4	4.22	26.48	6.25	up	NM_181351	RefSeq	Homo sapiens neural cell adhesion molecule 1 (NCAM1), transcript variant 2, mRNA.	chr11	+	112831969	113149158	GO:0007155 // GO:0007166 // GO:0034109 // GO:0050850 // GO:0007155 // GO:0007166 // GO:0034109 // GO:0050850 // GO:0007155 // GO:0007166 // GO:0034109 // GO:0050850 // GO:0007155 // GO:0007166 // GO:0034109 // GO:0050850 // GO:0034109 // GO:0007155 // GO:0050850 // GO:0007166 // GO:0007155 // GO:0007166 // GO:0034109 // GO:0050850 // GO:0007155 // GO:0007166 // GO:0034109 // GO:0050850 // GO:0007…	cell adhesion // cell surface receptor linked signaling pathway // homotypic cell-cell adhesion // positive regulation of calcium-mediated signaling // cell adhesion // cell surface receptor linked signaling pathway // homotypic cell-cell adhesion // positive regulation of calcium-mediated signaling // cell adhesion // cell surface receptor linked signaling pathway // homotypic cell-cell adhesion…	inferred from electronic annotation // inferred from electronic annotation // inferred from electronic annotation // inferred from electronic annotation // inferred from electronic annotation // inferred from electronic annotation // inferred from electronic annotation // inferred from electronic annotation // inferred from electronic annotation // inferred from electronic annotation // inferred …	GO:0005576 // GO:0005886 // GO:0009897 // GO:0016021 // GO:0030424 // GO:0031225 // GO:0043025 // GO:0005576 // GO:0005886 // GO:0009897 // GO:0016021 // GO:0030424 // GO:0031225 // GO:0043025 // GO:0005576 // GO:0005886 // GO:0009897 // GO:0016021 // GO:0030424 // GO:0031225 // GO:0043025 // GO:0005576 // GO:0005886 // GO:0009897 // GO:0016021 // GO:0030424 // GO:0031225 // GO:0043025 // GO:0005…	extracellular region // plasma membrane // external side of plasma membrane // integral to membrane // axon // anchored to membrane // neuronal cell body // extracellular region // plasma membrane // external side of plasma membrane // integral to membrane // axon // anchored to membrane // neuronal cell body // extracellular region // plasma membrane // external side of plasma membrane // integr…	inferred from electronic annotation // not recorded // inferred from electronic annotation // inferred from electronic annotation // inferred from electronic annotation // inferred from electronic annotation // inferred from electronic annotation // inferred from electronic annotation // not recorded // inferred from electronic annotation // inferred from electronic annotation // inferred from el…	---	---	---	---	---	Pfam // Pfam // Pfam // Pfam // Pfam	IPR013162 // IPR013162 // IPR013162 // IPR013162 // IPR013162	CD80-like C2-set immunoglobulin // CD80-like C2-set immunoglobulin // CD80-like C2-set immunoglobulin // CD80-like C2-set immunoglobulin // CD80-like C2-set immunoglobulin	main				AL833634 NR_034101	4.08806	4.62919	5.47138	2.13936	2.03481	2.01658
17013507	SAMD5	sterile alpha motif domain containing 5	coding	< 1e-07	< 1e-07	10	62.24	6.25	up	NM_001030060	RefSeq	Homo sapiens sterile alpha motif domain containing 5 (SAMD5), mRNA.	chr6	+	147829828	147891157	---	---	---	---	---	---	---	---	---	---	---	---	---	---	main					6.04419	5.64812	6.19482	3.2667	3.43982	3.21349
16763783	COL2A1	collagen, type II, alpha 1	coding	< 1e-07	< 1e-07	8.64	52.34	5.88235	up	NM_001844	RefSeq	Homo sapiens collagen, type II, alpha 1 (COL2A1), transcript variant 1, mRNA.	chr12	-	48366748	48398285	GO:0001501 // GO:0001502 // GO:0001894 // GO:0001958 // GO:0002062 // GO:0003007 // GO:0006029 // GO:0007601 // GO:0007605 // GO:0010468 // GO:0030199 // GO:0035108 // GO:0042472 // GO:0043066 // GO:0051216 // GO:0060021 // GO:0060272 // GO:0060348 // GO:0060351 // GO:0001501 // GO:0001502 // GO:0001894 // GO:0001958 // GO:0002062 // GO:0003007 // GO:0006029 // GO:0007601 // GO:0007605 // GO:0010…	skeletal system development // cartilage condensation // tissue homeostasis // endochondral ossification // chondrocyte differentiation // heart morphogenesis // proteoglycan metabolic process // visual perception // sensory perception of sound // regulation of gene expression // collagen fibril organization // limb morphogenesis // inner ear morphogenesis // negative regulation of apoptosis // c…	inferred from mutant phenotype // inferred from electronic annotation // inferred from electronic annotation // inferred from electronic annotation // inferred from electronic annotation // inferred from electronic annotation // inferred from electronic annotation // inferred from mutant phenotype // inferred from mutant phenotype // inferred from electronic annotation // inferred from mutant phe…	GO:0005576 // GO:0005581 // GO:0005585 // GO:0005604 // GO:0005615 // GO:0005737 // GO:0005576 // GO:0005581 // GO:0005585 // GO:0005604 // GO:0005615 // GO:0005737 // GO:0005576 // GO:0005581 // GO:0005585 // GO:0005604 // GO:0005615 // GO:0005737 // GO:0005737 // GO:0005576 // GO:0005604 // GO:0005581 // GO:0005585 // GO:0005615 // GO:0031012 // GO:0005576 // GO:0005581 // GO:0005585 // GO:0005…	extracellular region // collagen // collagen type II // basement membrane // extracellular space // cytoplasm // extracellular region // collagen // collagen type II // basement membrane // extracellular space // cytoplasm // extracellular region // collagen // collagen type II // basement membrane // extracellular space // cytoplasm // cytoplasm // extracellular region // basement membrane // co…	not recorded // inferred from electronic annotation // inferred from direct assay // inferred from electronic annotation // inferred from electronic annotation // inferred from electronic annotation // not recorded // inferred from electronic annotation // inferred from direct assay // inferred from electronic annotation // inferred from electronic annotation // inferred from electronic annotatio…	GO:0030020 // GO:0042802 // GO:0048407 // GO:0030020 // GO:0042802 // GO:0048407 // GO:0030020 // GO:0042802 // GO:0048407 // GO:0030020 // GO:0048407 // GO:0042802 // GO:0005201 // GO:0005102 // GO:0030020 // GO:0042802 // GO:0048407 // GO:0030020 // GO:0042802 // GO:0048407	extracellular matrix structural constituent conferring tensile strength // identical protein binding // platelet-derived growth factor binding // extracellular matrix structural constituent conferring tensile strength // identical protein binding // platelet-derived growth factor binding // extracellular matrix structural constituent conferring tensile strength // identical protein binding // pla…	inferred by curator // non-traceable author statement // inferred from direct assay // inferred by curator // non-traceable author statement // inferred from direct assay // inferred by curator // non-traceable author statement // inferred from direct assay // --- // --- // --- // --- // --- // inferred by curator // non-traceable author statement // inferred from direct assay // inferred by cura…	GenMAPP // GenMAPP // GenMAPP	mRNA_processing_Reactome // mRNA_processing_Reactome // mRNA_processing_Reactome	---	---	---	main					5.65136	5.90834	5.57773	3.20209	2.8024	3.28431
16995301	RANBP3L	RAN binding protein 3-like	coding	< 1e-07	< 1e-07	14.11	78.99	5.55556	up	NM_001161429	RefSeq	Homo sapiens RAN binding protein 3-like (RANBP3L), transcript variant 1, mRNA.	chr5	-	36248536	36302216	GO:0046907 // GO:0046907 // GO:0046907 // GO:0046907 // GO:0046907 // GO:0046907	intracellular transport // intracellular transport // intracellular transport // intracellular transport // intracellular transport // intracellular transport	inferred from electronic annotation // inferred from electronic annotation // inferred from electronic annotation // --- // inferred from electronic annotation // inferred from electronic annotation	---	---	---	---	---	---	---	---	---	---	---	main					6.14922	6.34096	6.42898	3.56607	3.68298	4.16136
16853225	SALL3	sal-like 3 (Drosophila)	coding	2.0E-7	3.88E-5	4	22.42	5.55556	up	NM_171999	RefSeq	Homo sapiens sal-like 3 (Drosophila) (SALL3), mRNA.	chr18	+	76740275	76758969	GO:0021891 // GO:0045449 // GO:0021891 // GO:0045449 // GO:0021891 // GO:0045449 // GO:0021891 // GO:0045449 // GO:0021891 // GO:0045449	olfactory bulb interneuron development // regulation of transcription // olfactory bulb interneuron development // regulation of transcription // olfactory bulb interneuron development // regulation of transcription // olfactory bulb interneuron development // regulation of transcription // olfactory bulb interneuron development // regulation of transcription	inferred from electronic annotation // inferred from electronic annotation // inferred from electronic annotation // inferred from electronic annotation // --- // --- // inferred from electronic annotation // inferred from electronic annotation // inferred from electronic annotation // inferred from electronic annotation	GO:0005622 // GO:0005634 // GO:0005737 // GO:0005622 // GO:0005634 // GO:0005737 // GO:0005622 // GO:0005737 // GO:0005634 // GO:0005622 // GO:0005634 // GO:0005737 // GO:0005622 // GO:0005634 // GO:0005737 // GO:0005622	intracellular // nucleus // cytoplasm // intracellular // nucleus // cytoplasm // intracellular // cytoplasm // nucleus // intracellular // nucleus // cytoplasm // intracellular // nucleus // cytoplasm // intracellular	inferred from electronic annotation // inferred from direct assay // inferred from direct assay // inferred from electronic annotation // inferred from direct assay // inferred from direct assay // --- // --- // --- // inferred from electronic annotation // inferred from direct assay // inferred from direct assay // inferred from electronic annotation // inferred from direct assay // inferred fro…	GO:0003677 // GO:0008270 // GO:0046872 // GO:0003677 // GO:0008270 // GO:0046872 // GO:0046872 // GO:0003677 // GO:0008270 // GO:0003677 // GO:0008270 // GO:0046872 // GO:0003677 // GO:0008270 // GO:0046872 // GO:0003677 // GO:0008270	DNA binding // zinc ion binding // metal ion binding // DNA binding // zinc ion binding // metal ion binding // metal ion binding // DNA binding // zinc ion binding // DNA binding // zinc ion binding // metal ion binding // DNA binding // zinc ion binding // metal ion binding // DNA binding // zinc ion binding	inferred from electronic annotation // inferred from electronic annotation // inferred from electronic annotation // inferred from electronic annotation // inferred from electronic annotation // inferred from electronic annotation // --- // --- // --- // inferred from electronic annotation // inferred from electronic annotation // inferred from electronic annotation // inferred from electronic an…	---	---	---	---	---	main					4.02408	4.52401	4.91957	2.09506	1.98034	1.87666
16778241	POSTN	periostin, osteoblast specific factor	coding	1.0E-7	2.22E-5	6.73	35.47	5.26316	up	NM_006475	RefSeq	Homo sapiens periostin, osteoblast specific factor (POSTN), transcript variant 1, mRNA.	chr13	-	38136282	38183563	GO:0001501 // GO:0007155 // GO:0001501 // GO:0007155 // GO:0001501 // GO:0007155 // GO:0001501 // GO:0007155 // GO:0001501 // GO:0007155 // GO:0007155 // GO:0001501 // GO:0030198 // GO:0009888 // GO:0001501 // GO:0007155 // GO:0001501 // GO:0007155 // GO:0001501 // GO:0007155 // GO:0001501 // GO:0007155	skeletal system development // cell adhesion // skeletal system development // cell adhesion // skeletal system development // cell adhesion // skeletal system development // cell adhesion // skeletal system development // cell adhesion // cell adhesion // skeletal system development // extracellular matrix organization // tissue development // skeletal system development // cell adhesion // skel…	traceable author statement // inferred from direct assay // traceable author statement // inferred from direct assay // traceable author statement // inferred from direct assay // traceable author statement // inferred from direct assay // traceable author statement // inferred from direct assay // --- // --- // --- // --- // traceable author statement // inferred from direct assay // traceable a…	GO:0005576 // GO:0005578 // GO:0031012 // GO:0005576 // GO:0005578 // GO:0031012 // GO:0005576 // GO:0005578 // GO:0031012 // GO:0005576 // GO:0005578 // GO:0031012 // GO:0005576 // GO:0005578 // GO:0031012 // GO:0031012 // GO:0005578 // GO:0005576 // GO:0005576 // GO:0005578 // GO:0031012 // GO:0005576 // GO:0005578 // GO:0031012 // GO:0005576 // GO:0005578 // GO:0031012 // GO:0005576 // GO:0005…	extracellular region // proteinaceous extracellular matrix // extracellular matrix // extracellular region // proteinaceous extracellular matrix // extracellular matrix // extracellular region // proteinaceous extracellular matrix // extracellular matrix // extracellular region // proteinaceous extracellular matrix // extracellular matrix // extracellular region // proteinaceous extracellular mat…	inferred from electronic annotation // inferred from sequence or structural similarity // inferred from direct assay // inferred from electronic annotation // inferred from sequence or structural similarity // inferred from direct assay // inferred from electronic annotation // inferred from sequence or structural similarity // inferred from direct assay // inferred from electronic annotation // …	GO:0008201 // GO:0008201 // GO:0008201 // GO:0008201 // GO:0008201 // GO:0008201 // GO:0008201 // GO:0008201 // GO:0008201 // GO:0008201	heparin binding // heparin binding // heparin binding // heparin binding // heparin binding // heparin binding // heparin binding // heparin binding // heparin binding // heparin binding	inferred from sequence or structural similarity // inferred from sequence or structural similarity // inferred from sequence or structural similarity // inferred from sequence or structural similarity // inferred from sequence or structural similarity // --- // inferred from sequence or structural similarity // inferred from sequence or structural similarity // inferred from sequence or structura…	---	---	---	---	---	main					5.09417	5.28572	5.07445	3.13944	2.5528	2.51344
16708249	SCD	stearoyl-CoA desaturase (delta-9-desaturase)	coding	< 1e-07	< 1e-07	41.99	223.29	5.26316	up	NM_005063	RefSeq	Homo sapiens stearoyl-CoA desaturase (delta-9-desaturase) (SCD), mRNA.	chr10	+	102106772	102124591	GO:0006633 // GO:0055114 // GO:0006633 // GO:0055114 // GO:0006633 // GO:0055114 // GO:0006629 // GO:0006633 // GO:0055114 // GO:0006633 // GO:0055114 // GO:0006629 // GO:0055114	fatty acid biosynthetic process // oxidation reduction // fatty acid biosynthetic process // oxidation reduction // fatty acid biosynthetic process // oxidation reduction // lipid metabolic process // fatty acid biosynthetic process // oxidation reduction // fatty acid biosynthetic process // oxidation reduction // lipid metabolic process // oxidation reduction	inferred from electronic annotation // inferred from electronic annotation // inferred from electronic annotation // inferred from electronic annotation // --- // --- // --- // inferred from electronic annotation // inferred from electronic annotation // inferred from electronic annotation // inferred from electronic annotation // --- // ---	GO:0005783 // GO:0005789 // GO:0016020 // GO:0016021 // GO:0031965 // GO:0005783 // GO:0005789 // GO:0016020 // GO:0016021 // GO:0031965 // GO:0031965 // GO:0016020 // GO:0005789 // GO:0005783 // GO:0016021 // GO:0005783 // GO:0005789 // GO:0016020 // GO:0016021 // GO:0031965 // GO:0005783 // GO:0005789 // GO:0016020 // GO:0016021 // GO:0031965	endoplasmic reticulum // endoplasmic reticulum membrane // membrane // integral to membrane // nuclear membrane // endoplasmic reticulum // endoplasmic reticulum membrane // membrane // integral to membrane // nuclear membrane // nuclear membrane // membrane // endoplasmic reticulum membrane // endoplasmic reticulum // integral to membrane // endoplasmic reticulum // endoplasmic reticulum membran…	inferred from direct assay // inferred from electronic annotation // inferred from electronic annotation // inferred from electronic annotation // inferred from direct assay // inferred from direct assay // inferred from electronic annotation // inferred from electronic annotation // inferred from electronic annotation // inferred from direct assay // --- // --- // --- // --- // --- // inferred f…	GO:0004768 // GO:0005506 // GO:0016491 // GO:0016717 // GO:0004768 // GO:0005506 // GO:0016491 // GO:0016717 // GO:0016491 // GO:0005506 // GO:0004768 // GO:0004768 // GO:0005506 // GO:0016491 // GO:0016717 // GO:0004768 // GO:0005506 // GO:0016491 // GO:0016717 // GO:0016491	stearoyl-CoA 9-desaturase activity // iron ion binding // oxidoreductase activity // oxidoreductase activity, acting on paired donors, with oxidation of a pair of donors resulting in the reduction of molecular oxygen to two molecules of water // stearoyl-CoA 9-desaturase activity // iron ion binding // oxidoreductase activity // oxidoreductase activity, acting on paired donors, with oxidation of …	inferred from electronic annotation // inferred from electronic annotation // inferred from electronic annotation // inferred from electronic annotation // inferred from electronic annotation // inferred from electronic annotation // inferred from electronic annotation // inferred from electronic annotation // --- // --- // --- // inferred from electronic annotation // inferred from electronic an…	GenMAPP // GenMAPP	Fatty_Acid_Synthesis // Fatty_Acid_Synthesis	---	---	---	main			TCONS_00018307-XLOC_008583 8742bp;		7.69521	7.79638	7.92488	5.32981	5.44286	5.35814
16729986	FAT3	FAT tumor suppressor homolog 3 (Drosophila)	coding	< 1e-07	< 1e-07	5.76	28.44	5	up	NM_001008781	RefSeq	Homo sapiens FAT tumor suppressor homolog 3 (Drosophila) (FAT3), mRNA.	chr11	+	92085262	92629636	GO:0007155 // GO:0007156 // GO:0007275 // GO:0007155 // GO:0007156 // GO:0007275 // GO:0007156 // GO:0007155 // GO:0007155 // GO:0007156 // GO:0007275 // GO:0007155 // GO:0007156 // GO:0007275	cell adhesion // homophilic cell adhesion // multicellular organismal development // cell adhesion // homophilic cell adhesion // multicellular organismal development // homophilic cell adhesion // cell adhesion // cell adhesion // homophilic cell adhesion // multicellular organismal development // cell adhesion // homophilic cell adhesion // multicellular organismal development	inferred from electronic annotation // inferred from electronic annotation // inferred from electronic annotation // inferred from electronic annotation // inferred from electronic annotation // inferred from electronic annotation // --- // --- // inferred from electronic annotation // inferred from electronic annotation // inferred from electronic annotation // --- // --- // ---	GO:0005886 // GO:0016021 // GO:0005886 // GO:0016021 // GO:0016020 // GO:0005886 // GO:0005886 // GO:0016021 // GO:0016021 // GO:0005886 // GO:0016020	plasma membrane // integral to membrane // plasma membrane // integral to membrane // membrane // plasma membrane // plasma membrane // integral to membrane // integral to membrane // plasma membrane // membrane	inferred from electronic annotation // inferred from electronic annotation // inferred from electronic annotation // inferred from electronic annotation // --- // --- // inferred from electronic annotation // inferred from electronic annotation // --- // --- // ---	GO:0005509 // GO:0005509 // GO:0005509 // GO:0005515 // GO:0005509 // GO:0005509 // GO:0005515	calcium ion binding // calcium ion binding // calcium ion binding // protein binding // calcium ion binding // calcium ion binding // protein binding	inferred from electronic annotation // inferred from electronic annotation // --- // --- // inferred from electronic annotation // --- // ---	---	---	---	---	---	main					4.78253	4.87345	4.84115	2.49078	2.55918	2.48143
16819224	MT1M	metallothionein 1M	coding	1.48E-5	8.37E-4	9.54	48.89	5	up	NM_176870	RefSeq	Homo sapiens metallothionein 1M (MT1M), mRNA.	chr16	+	56666534	56667898	---	---	---	---	---	---	GO:0046872 // GO:0046872 // GO:0046872 // GO:0046872	metal ion binding // metal ion binding // metal ion binding // metal ion binding	inferred from electronic annotation // inferred from electronic annotation // --- // inferred from electronic annotation	---	---	---	---	---	main			NR_036677 1753bp; TCONS_00024227-XLOC_011736 9487bp;		5.84866	5.6153	5.37875	2.50133	3.95193	3.26218
16690211	COL11A1	collagen, type XI, alpha 1	coding	< 1e-07	< 1e-07	20.33	97.46	4.7619	up	NM_001854	RefSeq	Homo sapiens collagen, type XI, alpha 1 (COL11A1), transcript variant A, mRNA.	chr1	-	103342023	103574052	GO:0007155 // GO:0007601 // GO:0007605 // GO:0030198 // GO:0030199 // GO:0050910 // GO:0007155 // GO:0007601 // GO:0007605 // GO:0030198 // GO:0030199 // GO:0050910 // GO:0007155 // GO:0007601 // GO:0007605 // GO:0030198 // GO:0030199 // GO:0050910 // GO:0007155 // GO:0007601 // GO:0007605 // GO:0030198 // GO:0030199 // GO:0050910 // GO:0007155 // GO:0007601 // GO:0007605 // GO:0030198 // GO:0030…	cell adhesion // visual perception // sensory perception of sound // extracellular matrix organization // collagen fibril organization // detection of mechanical stimulus involved in sensory perception of sound // cell adhesion // visual perception // sensory perception of sound // extracellular matrix organization // collagen fibril organization // detection of mechanical stimulus involved in se…	inferred from electronic annotation // inferred from mutant phenotype // inferred from mutant phenotype // non-traceable author statement // non-traceable author statement // inferred from mutant phenotype // inferred from electronic annotation // inferred from mutant phenotype // inferred from mutant phenotype // non-traceable author statement // non-traceable author statement // inferred from m…	GO:0005576 // GO:0005581 // GO:0005592 // GO:0005592 // GO:0005576 // GO:0005581 // GO:0005592 // GO:0005592 // GO:0005576 // GO:0005581 // GO:0005592 // GO:0005592 // GO:0005576 // GO:0005581 // GO:0005592 // GO:0005592 // GO:0005576 // GO:0005581 // GO:0005592 // GO:0005592 // GO:0005592 // GO:0005576 // GO:0005581 // GO:0005576 // GO:0005581 // GO:0005592 // GO:0005592 // GO:0005581 // GO:0031…	extracellular region // collagen // collagen type XI // collagen type XI // extracellular region // collagen // collagen type XI // collagen type XI // extracellular region // collagen // collagen type XI // collagen type XI // extracellular region // collagen // collagen type XI // collagen type XI // extracellular region // collagen // collagen type XI // collagen type XI // collagen type XI //…	inferred from electronic annotation // inferred from electronic annotation // inferred from direct assay // non-traceable author statement // inferred from electronic annotation // inferred from electronic annotation // inferred from direct assay // non-traceable author statement // inferred from electronic annotation // inferred from electronic annotation // inferred from direct assay // non-tra…	GO:0005201 // GO:0030674 // GO:0050840 // GO:0005201 // GO:0030674 // GO:0050840 // GO:0005201 // GO:0030674 // GO:0050840 // GO:0005201 // GO:0030674 // GO:0050840 // GO:0005201 // GO:0030674 // GO:0050840 // GO:0005201 // GO:0030674 // GO:0050840 // GO:0005102 // GO:0005198 // GO:0005201 // GO:0030674 // GO:0050840 // GO:0005201 // GO:0005102 // GO:0005198 // GO:0005201 // GO:0030674 // GO:0050…	extracellular matrix structural constituent // protein binding, bridging // extracellular matrix binding // extracellular matrix structural constituent // protein binding, bridging // extracellular matrix binding // extracellular matrix structural constituent // protein binding, bridging // extracellular matrix binding // extracellular matrix structural constituent // protein binding, bridging //…	non-traceable author statement // non-traceable author statement // non-traceable author statement // non-traceable author statement // non-traceable author statement // non-traceable author statement // non-traceable author statement // non-traceable author statement // non-traceable author statement // non-traceable author statement // non-traceable author statement // non-traceable author stat…	---	---	---	---	---	main					6.59523	6.63718	6.59616	4.35485	4.22464	4.41176
16763032	PKP2	plakophilin 2	coding	1.0E-7	2.22E-5	5.71	26.22	4.54545	up	NM_001005242	RefSeq	Homo sapiens plakophilin 2 (PKP2), transcript variant 2a, mRNA.	chr12	-	32943679	33049780	GO:0007507 // GO:0016337 // GO:0007507 // GO:0016337 // GO:0007507 // GO:0016337 // GO:0007507 // GO:0016337 // GO:0016337 // GO:0007507 // GO:0007507 // GO:0016337	heart development // cell-cell adhesion // heart development // cell-cell adhesion // heart development // cell-cell adhesion // heart development // cell-cell adhesion // cell-cell adhesion // heart development // heart development // cell-cell adhesion	inferred from electronic annotation // non-traceable author statement // inferred from electronic annotation // non-traceable author statement // inferred from electronic annotation // non-traceable author statement // inferred from electronic annotation // non-traceable author statement // --- // --- // inferred from electronic annotation // non-traceable author statement	GO:0005634 // GO:0005634 // GO:0005886 // GO:0005911 // GO:0005912 // GO:0016021 // GO:0030054 // GO:0030057 // GO:0005634 // GO:0005634 // GO:0005886 // GO:0005911 // GO:0005912 // GO:0016021 // GO:0030054 // GO:0030057 // GO:0005634 // GO:0005634 // GO:0005886 // GO:0005911 // GO:0005912 // GO:0016021 // GO:0030054 // GO:0030057 // GO:0005634 // GO:0005634 // GO:0005886 // GO:0005911 // GO:0005…	nucleus // nucleus // plasma membrane // cell-cell junction // adherens junction // integral to membrane // cell junction // desmosome // nucleus // nucleus // plasma membrane // cell-cell junction // adherens junction // integral to membrane // cell junction // desmosome // nucleus // nucleus // plasma membrane // cell-cell junction // adherens junction // integral to membrane // cell junction /…	inferred from direct assay // non-traceable author statement // inferred from direct assay // traceable author statement // inferred from electronic annotation // traceable author statement // inferred from direct assay // non-traceable author statement // inferred from direct assay // non-traceable author statement // inferred from direct assay // traceable author statement // inferred from elec…	GO:0003674 // GO:0005488 // GO:0003674 // GO:0005488 // GO:0003674 // GO:0005488 // GO:0005488 // GO:0003674 // GO:0005488 // GO:0005488 // GO:0003674 // GO:0003674 // GO:0005488	molecular_function // binding // molecular_function // binding // molecular_function // binding // binding // molecular_function // binding // binding // molecular_function // molecular_function // binding	no biological data available // inferred from electronic annotation // no biological data available // inferred from electronic annotation // no biological data available // inferred from electronic annotation // --- // no biological data available // inferred from electronic annotation // --- // --- // no biological data available // inferred from electronic annotation	---	---	---	---	---	main					4.83412	4.6107	4.70131	2.85606	2.31882	2.31758
16675158	PRG4	proteoglycan 4	coding	1.0E-7	2.22E-5	30.63	139.04	4.54545	up	NM_005807	RefSeq	Homo sapiens proteoglycan 4 (PRG4), transcript variant A, mRNA.	chr1	+	186265405	186283694	GO:0006955 // GO:0008283 // GO:0006955 // GO:0008283 // GO:0006955 // GO:0008283 // GO:0006955 // GO:0008283 // GO:0006955 // GO:0008283 // GO:0008283 // GO:0006955 // GO:0006955 // GO:0008283 // GO:0008283 // GO:0006955 // GO:0006955 // GO:0008283 // GO:0006955 // GO:0006955 // GO:0008283 // GO:0006955 // GO:0006955 // GO:0008283 // GO:0006955 // GO:0008283 // GO:0006955 // GO:0008283 // GO:0006…	immune response // cell proliferation // immune response // cell proliferation // immune response // cell proliferation // immune response // cell proliferation // immune response // cell proliferation // cell proliferation // immune response // immune response // cell proliferation // cell proliferation // immune response // immune response // cell proliferation // immune response // immune resp…	inferred from electronic annotation // traceable author statement // inferred from electronic annotation // traceable author statement // inferred from electronic annotation // traceable author statement // inferred from electronic annotation // traceable author statement // inferred from electronic annotation // traceable author statement // --- // --- // inferred from electronic annotation // t…	GO:0005576 // GO:0005576 // GO:0005576 // GO:0005576 // GO:0005576 // GO:0005576 // GO:0005576 // GO:0005576 // GO:0005576 // GO:0005576 // GO:0005576 // GO:0005576 // GO:0005576 // GO:0005576	extracellular region // extracellular region // extracellular region // extracellular region // extracellular region // extracellular region // extracellular region // extracellular region // extracellular region // extracellular region // extracellular region // extracellular region // extracellular region // extracellular region	inferred from electronic annotation // inferred from electronic annotation // inferred from electronic annotation // inferred from electronic annotation // inferred from electronic annotation // --- // inferred from electronic annotation // --- // inferred from electronic annotation // inferred from electronic annotation // inferred from electronic annotation // inferred from electronic annotatio…	GO:0005044 // GO:0005515 // GO:0030247 // GO:0005044 // GO:0005515 // GO:0030247 // GO:0005044 // GO:0005515 // GO:0030247 // GO:0005044 // GO:0005515 // GO:0030247 // GO:0005044 // GO:0005515 // GO:0030247 // GO:0005044 // GO:0005515 // GO:0030247 // GO:0005044 // GO:0005515 // GO:0030247 // GO:0005044 // GO:0005515 // GO:0030247 // GO:0005044 // GO:0005515 // GO:0030247 // GO:0005044 // GO:0030…	scavenger receptor activity // protein binding // polysaccharide binding // scavenger receptor activity // protein binding // polysaccharide binding // scavenger receptor activity // protein binding // polysaccharide binding // scavenger receptor activity // protein binding // polysaccharide binding // scavenger receptor activity // protein binding // polysaccharide binding // scavenger receptor …	inferred from electronic annotation // inferred from physical interaction // inferred from electronic annotation // inferred from electronic annotation // inferred from physical interaction // inferred from electronic annotation // inferred from electronic annotation // inferred from physical interaction // inferred from electronic annotation // inferred from electronic annotation // inferred fro…	---	---	---	---	---	main					6.8077	7.21016	7.34851	4.77425	5.06223	4.93008
16667760	S1PR1	sphingosine-1-phosphate receptor 1	coding	< 1e-07	< 1e-07	5.28	23.87	4.54545	up	NM_001400	RefSeq	Homo sapiens sphingosine-1-phosphate receptor 1 (S1PR1), mRNA.	chr1	+	101702305	101707076	GO:0007155 // GO:0007186 // GO:0007155 // GO:0007186 // GO:0007155 // GO:0007186 // GO:0007155 // GO:0007186 // GO:0007155 // GO:0007186 // GO:0007186 // GO:0045944 // GO:0048661 // GO:0030335 // GO:0019226 // GO:0007193 // GO:0030182 // GO:0051482 // GO:0045446 // GO:0050927 // GO:0032320 // GO:0051497 // GO:0008284 // GO:0007420 // GO:0001525 // GO:0030155	cell adhesion // G-protein coupled receptor protein signaling pathway // cell adhesion // G-protein coupled receptor protein signaling pathway // cell adhesion // G-protein coupled receptor protein signaling pathway // cell adhesion // G-protein coupled receptor protein signaling pathway // cell adhesion // G-protein coupled receptor protein signaling pathway // G-protein coupled receptor protein…	traceable author statement // traceable author statement // traceable author statement // traceable author statement // --- // --- // traceable author statement // traceable author statement // traceable author statement // traceable author statement // --- // --- // --- // --- // --- // --- // --- // --- // --- // --- // --- // --- // --- // --- // --- // ---	GO:0005886 // GO:0016021 // GO:0005886 // GO:0016021 // GO:0016021 // GO:0005886 // GO:0005886 // GO:0016021 // GO:0005886 // GO:0016021 // GO:0016021 // GO:0009897	plasma membrane // integral to membrane // plasma membrane // integral to membrane // integral to membrane // plasma membrane // plasma membrane // integral to membrane // plasma membrane // integral to membrane // integral to membrane // external side of plasma membrane	not recorded // inferred from electronic annotation // not recorded // inferred from electronic annotation // --- // --- // not recorded // inferred from electronic annotation // not recorded // inferred from electronic annotation // --- // ---	GO:0001619 // GO:0004872 // GO:0004930 // GO:0001619 // GO:0004872 // GO:0004930 // GO:0004930 // GO:0004872 // GO:0001619 // GO:0001619 // GO:0004872 // GO:0004930 // GO:0001619 // GO:0004872 // GO:0004930 // GO:0004930 // GO:0046625	lysosphingolipid and lysophosphatidic acid receptor activity // receptor activity // G-protein coupled receptor activity // lysosphingolipid and lysophosphatidic acid receptor activity // receptor activity // G-protein coupled receptor activity // G-protein coupled receptor activity // receptor activity // lysosphingolipid and lysophosphatidic acid receptor activity // lysosphingolipid and lysoph…	inferred from electronic annotation // inferred from electronic annotation // inferred from electronic annotation // inferred from electronic annotation // inferred from electronic annotation // inferred from electronic annotation // --- // --- // --- // inferred from electronic annotation // inferred from electronic annotation // inferred from electronic annotation // inferred from electronic an…	GenMAPP // GenMAPP // GenMAPP // GenMAPP // GenMAPP // GenMAPP	S1P_Signaling // GPCRDB_Other // Small_ligand_GPCRs // S1P_Signaling // GPCRDB_Other // Small_ligand_GPCRs	Pfam	IPR002651	Protein of unknown function DUF32	main					4.75369	4.52541	4.46054	2.31083	2.59165	2.256
17116200	USP9Y	ubiquitin specific peptidase 9, Y-linked	coding	< 1e-07	< 1e-07	7.27	33.17	4.54545	up	NM_004654	RefSeq	Homo sapiens ubiquitin specific peptidase 9, Y-linked (USP9Y), mRNA.	chrY	+	14813160	14972957	GO:0006511 // GO:0007179 // GO:0007283 // GO:0016579 // GO:0030509 // GO:0006511 // GO:0007179 // GO:0007283 // GO:0016579 // GO:0030509 // GO:0007179 // GO:0007283 // GO:0016579 // GO:0030509 // GO:0006511 // GO:0006511 // GO:0007179 // GO:0007283 // GO:0016579 // GO:0030509	ubiquitin-dependent protein catabolic process // transforming growth factor beta receptor signaling pathway // spermatogenesis // protein deubiquitination // BMP signaling pathway // ubiquitin-dependent protein catabolic process // transforming growth factor beta receptor signaling pathway // spermatogenesis // protein deubiquitination // BMP signaling pathway // transforming growth factor beta r…	inferred from electronic annotation // inferred from sequence or structural similarity // traceable author statement // inferred from sequence or structural similarity // inferred from sequence or structural similarity // inferred from electronic annotation // inferred from sequence or structural similarity // traceable author statement // inferred from sequence or structural similarity // inferr…	GO:0005737 // GO:0005737 // GO:0005737 // GO:0005737	cytoplasm // cytoplasm // cytoplasm // cytoplasm	inferred from sequence or structural similarity // inferred from sequence or structural similarity // --- // inferred from sequence or structural similarity	GO:0004221 // GO:0004843 // GO:0005488 // GO:0008233 // GO:0008234 // GO:0070410 // GO:0004221 // GO:0004843 // GO:0005488 // GO:0008233 // GO:0008234 // GO:0070410 // GO:0004221 // GO:0004843 // GO:0070410 // GO:0008233 // GO:0008234 // GO:0004221 // GO:0004843 // GO:0005488 // GO:0008233 // GO:0008234 // GO:0070410	ubiquitin thiolesterase activity // ubiquitin-specific protease activity // binding // peptidase activity // cysteine-type peptidase activity // co-SMAD binding // ubiquitin thiolesterase activity // ubiquitin-specific protease activity // binding // peptidase activity // cysteine-type peptidase activity // co-SMAD binding // ubiquitin thiolesterase activity // ubiquitin-specific protease activit…	inferred from electronic annotation // traceable author statement // inferred from electronic annotation // inferred from electronic annotation // inferred from electronic annotation // inferred from sequence or structural similarity // inferred from electronic annotation // traceable author statement // inferred from electronic annotation // inferred from electronic annotation // inferred from e…	---	---	---	---	---	main	TCONS_00017578-XLOC_008295 8998bp;				5.07944	5.16064	4.92397	2.62981	2.91911	2.99012
16939203	XYLB	xylulokinase homolog (H. influenzae)	coding	< 1e-07	< 1e-07	11.12	51.42	4.54545	up	NM_005108	RefSeq	Homo sapiens xylulokinase homolog (H. influenzae) (XYLB), mRNA.	chr3	+	38388251	38462839	GO:0005975 // GO:0006091 // GO:0042732 // GO:0005975 // GO:0006091 // GO:0042732 // GO:0042732 // GO:0006091 // GO:0005975 // GO:0005975 // GO:0006091 // GO:0042732 // GO:0005975 // GO:0006091 // GO:0042732	carbohydrate metabolic process // generation of precursor metabolites and energy // D-xylose metabolic process // carbohydrate metabolic process // generation of precursor metabolites and energy // D-xylose metabolic process // D-xylose metabolic process // generation of precursor metabolites and energy // carbohydrate metabolic process // carbohydrate metabolic process // generation of precursor…	inferred from electronic annotation // traceable author statement // inferred from electronic annotation // inferred from electronic annotation // traceable author statement // inferred from electronic annotation // --- // --- // --- // inferred from electronic annotation // traceable author statement // inferred from electronic annotation // inferred from electronic annotation // traceable autho…	---	---	---	GO:0000166 // GO:0004856 // GO:0005524 // GO:0016301 // GO:0016740 // GO:0000166 // GO:0004856 // GO:0005524 // GO:0016301 // GO:0016740 // GO:0000166 // GO:0016740 // GO:0016301 // GO:0004856 // GO:0005524 // GO:0016773 // GO:0000166 // GO:0004856 // GO:0005524 // GO:0016301 // GO:0016740 // GO:0000166 // GO:0004856 // GO:0005524 // GO:0016301 // GO:0016740	nucleotide binding // xylulokinase activity // ATP binding // kinase activity // transferase activity // nucleotide binding // xylulokinase activity // ATP binding // kinase activity // transferase activity // nucleotide binding // transferase activity // kinase activity // xylulokinase activity // ATP binding // phosphotransferase activity, alcohol group as acceptor // nucleotide binding // xylu…	inferred from electronic annotation // inferred from electronic annotation // inferred from electronic annotation // inferred from electronic annotation // inferred from electronic annotation // inferred from electronic annotation // inferred from electronic annotation // inferred from electronic annotation // inferred from electronic annotation // inferred from electronic annotation // --- // --…	---	---	Pfam	IPR000577	Carbohydrate kinase, FGGY	main					5.64587	5.5675	5.84717	3.67749	3.45488	3.24948
17115271	L1CAM	L1 cell adhesion molecule	coding	< 1e-07	< 1e-07	5.34	23.23	4.34783	up	NM_000425	RefSeq	Homo sapiens L1 cell adhesion molecule (L1CAM), transcript variant 1, mRNA.	chrX	-	153126969	153151627	GO:0007155 // GO:0007156 // GO:0007157 // GO:0007159 // GO:0007166 // GO:0007275 // GO:0007399 // GO:0007411 // GO:0008219 // GO:0022409 // GO:0030154 // GO:0031175 // GO:0033631 // GO:0034109 // GO:0050850 // GO:0007155 // GO:0007156 // GO:0007157 // GO:0007159 // GO:0007166 // GO:0007275 // GO:0007399 // GO:0007411 // GO:0008219 // GO:0022409 // GO:0030154 // GO:0031175 // GO:0033631 // GO:0034…	cell adhesion // homophilic cell adhesion // heterophilic cell-cell adhesion // leukocyte cell-cell adhesion // cell surface receptor linked signaling pathway // multicellular organismal development // nervous system development // axon guidance // cell death // positive regulation of cell-cell adhesion // cell differentiation // neuron projection development // cell-cell adhesion mediated by int…	inferred from electronic annotation // inferred from electronic annotation // inferred from electronic annotation // inferred from electronic annotation // inferred from electronic annotation // inferred from electronic annotation // inferred from electronic annotation // inferred from electronic annotation // inferred from electronic annotation // inferred from electronic annotation // inferred …	GO:0005624 // GO:0005886 // GO:0009897 // GO:0016021 // GO:0042734 // GO:0043195 // GO:0005624 // GO:0005886 // GO:0009897 // GO:0016021 // GO:0042734 // GO:0043195 // GO:0005624 // GO:0005886 // GO:0009897 // GO:0016021 // GO:0042734 // GO:0043195 // GO:0005624 // GO:0005886 // GO:0009897 // GO:0016021 // GO:0042734 // GO:0043195 // GO:0005886 // GO:0005624 // GO:0043195 // GO:0016021 // GO:0009…	membrane fraction // plasma membrane // external side of plasma membrane // integral to membrane // presynaptic membrane // terminal button // membrane fraction // plasma membrane // external side of plasma membrane // integral to membrane // presynaptic membrane // terminal button // membrane fraction // plasma membrane // external side of plasma membrane // integral to membrane // presynaptic m…	inferred from electronic annotation // not recorded // inferred from electronic annotation // inferred from electronic annotation // inferred from electronic annotation // inferred from electronic annotation // inferred from electronic annotation // not recorded // inferred from electronic annotation // inferred from electronic annotation // inferred from electronic annotation // inferred from el…	GO:0005178 // GO:0033691 // GO:0042802 // GO:0005178 // GO:0033691 // GO:0042802 // GO:0005178 // GO:0033691 // GO:0042802 // GO:0005178 // GO:0033691 // GO:0042802 // GO:0005178 // GO:0033691 // GO:0042802 // GO:0005178 // GO:0033691 // GO:0042802 // GO:0005178 // GO:0033691 // GO:0042802 // GO:0005515 // GO:0005178 // GO:0033691 // GO:0042802 // GO:0005178 // GO:0033691 // GO:0042802 // GO:0005…	integrin binding // sialic acid binding // identical protein binding // integrin binding // sialic acid binding // identical protein binding // integrin binding // sialic acid binding // identical protein binding // integrin binding // sialic acid binding // identical protein binding // integrin binding // sialic acid binding // identical protein binding // integrin binding // sialic acid binding…	inferred from electronic annotation // inferred from electronic annotation // inferred from electronic annotation // inferred from electronic annotation // inferred from electronic annotation // inferred from electronic annotation // inferred from electronic annotation // inferred from electronic annotation // inferred from electronic annotation // inferred from electronic annotation // inferred …	---	---	---	---	---	main					4.43244	4.48396	4.70596	2.39968	2.36222	2.44159
16911632	PCSK2	proprotein convertase subtilisin/kexin type 2	coding	< 1e-07	< 1e-07	194.15	860.54	4.34783	up	NM_002594	RefSeq	Homo sapiens proprotein convertase subtilisin/kexin type 2 (PCSK2), mRNA.	chr20	+	17206752	17465223	GO:0006508 // GO:0030070 // GO:0034230 // GO:0034231 // GO:0006508 // GO:0030070 // GO:0034230 // GO:0034231 // GO:0034230 // GO:0030070 // GO:0006508 // GO:0034231 // GO:0007399 // GO:0016486 // GO:0016540 // GO:0051605 // GO:0006508 // GO:0030070 // GO:0034230 // GO:0034231 // GO:0006508 // GO:0030070 // GO:0034230 // GO:0034231 // GO:0006508	proteolysis // insulin processing // enkephalin processing // islet amyloid polypeptide processing // proteolysis // insulin processing // enkephalin processing // islet amyloid polypeptide processing // enkephalin processing // insulin processing // proteolysis // islet amyloid polypeptide processing // nervous system development // peptide hormone processing // protein autoprocessing // protein…	inferred from direct assay // inferred from direct assay // inferred from sequence or structural similarity // inferred from sequence or structural similarity // inferred from direct assay // inferred from direct assay // inferred from sequence or structural similarity // inferred from sequence or structural similarity // --- // --- // --- // --- // --- // --- // --- // --- // inferred from direc…	GO:0005615 // GO:0005625 // GO:0016020 // GO:0030133 // GO:0030141 // GO:0031410 // GO:0005615 // GO:0005625 // GO:0016020 // GO:0030133 // GO:0030141 // GO:0031410 // GO:0031410 // GO:0005625 // GO:0030133 // GO:0016020 // GO:0005615 // GO:0030141 // GO:0030141 // GO:0005615 // GO:0005625 // GO:0016020 // GO:0030133 // GO:0030141 // GO:0031410 // GO:0005615 // GO:0005625 // GO:0016020 // GO:0030…	extracellular space // soluble fraction // membrane // transport vesicle // stored secretory granule // cytoplasmic vesicle // extracellular space // soluble fraction // membrane // transport vesicle // stored secretory granule // cytoplasmic vesicle // cytoplasmic vesicle // soluble fraction // transport vesicle // membrane // extracellular space // stored secretory granule // secretory granule …	inferred from direct assay // inferred from direct assay // inferred from direct assay // inferred from electronic annotation // inferred from electronic annotation // inferred from electronic annotation // inferred from direct assay // inferred from direct assay // inferred from direct assay // inferred from electronic annotation // inferred from electronic annotation // inferred from electronic…	GO:0004252 // GO:0005515 // GO:0008233 // GO:0032403 // GO:0004252 // GO:0005515 // GO:0008233 // GO:0032403 // GO:0032403 // GO:0005515 // GO:0004252 // GO:0008233 // GO:0004175 // GO:0004252 // GO:0005515 // GO:0008233 // GO:0032403 // GO:0004252 // GO:0005515 // GO:0008233 // GO:0032403 // GO:0004252	serine-type endopeptidase activity // protein binding // peptidase activity // protein complex binding // serine-type endopeptidase activity // protein binding // peptidase activity // protein complex binding // protein complex binding // protein binding // serine-type endopeptidase activity // peptidase activity // endopeptidase activity // serine-type endopeptidase activity // protein binding /…	inferred from direct assay // inferred from physical interaction // inferred from electronic annotation // inferred from electronic annotation // inferred from direct assay // inferred from physical interaction // inferred from electronic annotation // inferred from electronic annotation // --- // --- // --- // --- // --- // inferred from direct assay // inferred from physical interaction // infe…	---	---	---	---	---	main					9.71027	9.65284	9.89236	7.69614	7.44517	7.61712
16716782	PDLIM1	PDZ and LIM domain 1	coding	< 1e-07	< 1e-07	94.73	404.69	4.34783	up	NM_020992	RefSeq	Homo sapiens PDZ and LIM domain 1 (PDLIM1), mRNA.	chr10	-	96997329	97050781	GO:0001666 // GO:0006979 // GO:0045449 // GO:0001666 // GO:0006979 // GO:0045449 // GO:0001666 // GO:0006979 // GO:0045449 // GO:0001666 // GO:0006979 // GO:0045449	response to hypoxia // response to oxidative stress // regulation of transcription // response to hypoxia // response to oxidative stress // regulation of transcription // response to hypoxia // response to oxidative stress // regulation of transcription // response to hypoxia // response to oxidative stress // regulation of transcription	inferred from electronic annotation // traceable author statement // inferred from electronic annotation // inferred from electronic annotation // traceable author statement // inferred from electronic annotation // --- // --- // --- // inferred from electronic annotation // traceable author statement // inferred from electronic annotation	GO:0005667 // GO:0005737 // GO:0005856 // GO:0005667 // GO:0005737 // GO:0005856 // GO:0005737 // GO:0005856 // GO:0005667 // GO:0005667 // GO:0005737 // GO:0005856	transcription factor complex // cytoplasm // cytoskeleton // transcription factor complex // cytoplasm // cytoskeleton // cytoplasm // cytoskeleton // transcription factor complex // transcription factor complex // cytoplasm // cytoskeleton	inferred from electronic annotation // inferred from electronic annotation // inferred from electronic annotation // inferred from electronic annotation // inferred from electronic annotation // inferred from electronic annotation // --- // --- // --- // inferred from electronic annotation // inferred from electronic annotation // inferred from electronic annotation	GO:0003713 // GO:0005515 // GO:0008270 // GO:0046872 // GO:0003713 // GO:0005515 // GO:0008270 // GO:0046872 // GO:0046872 // GO:0005515 // GO:0008270 // GO:0003713 // GO:0003713 // GO:0005515 // GO:0008270 // GO:0046872	transcription coactivator activity // protein binding // zinc ion binding // metal ion binding // transcription coactivator activity // protein binding // zinc ion binding // metal ion binding // metal ion binding // protein binding // zinc ion binding // transcription coactivator activity // transcription coactivator activity // protein binding // zinc ion binding // metal ion binding	inferred from electronic annotation // inferred from electronic annotation // inferred from electronic annotation // inferred from electronic annotation // inferred from electronic annotation // inferred from electronic annotation // inferred from electronic annotation // inferred from electronic annotation // --- // --- // --- // --- // inferred from electronic annotation // inferred from electr…	---	---	---	---	---	main			BC043227 6428bp;		8.628	8.69943	8.66277	6.59748	6.64685	6.40832
16682348	ATP13A2	ATPase type 13A2	coding	< 1e-07	< 1e-07	46.02	192.53	4.16667	up	NM_022089	RefSeq	Homo sapiens ATPase type 13A2 (ATP13A2), transcript variant 1, mRNA.	chr1	-	17312453	17338423	GO:0006754 // GO:0006812 // GO:0006754 // GO:0006812 // GO:0006754 // GO:0006812 // GO:0006754 // GO:0006812 // GO:0006812 // GO:0006754 // GO:0008152 // GO:0006754 // GO:0006812 // GO:0006754 // GO:0008152 // GO:0006812 // GO:0006754 // GO:0006812 // GO:0006754 // GO:0008152 // GO:0006812 // GO:0006754 // GO:0006812 // GO:0006754 // GO:0006812 // GO:0006754	ATP biosynthetic process // cation transport // ATP biosynthetic process // cation transport // ATP biosynthetic process // cation transport // ATP biosynthetic process // cation transport // cation transport // ATP biosynthetic process // metabolic process // ATP biosynthetic process // cation transport // ATP biosynthetic process // metabolic process // cation transport // ATP biosynthetic proc…	inferred from electronic annotation // inferred from electronic annotation // inferred from electronic annotation // inferred from electronic annotation // inferred from electronic annotation // inferred from electronic annotation // inferred from electronic annotation // inferred from electronic annotation // --- // --- // --- // inferred from electronic annotation // inferred from electronic an…	GO:0016020 // GO:0016021 // GO:0016020 // GO:0016021 // GO:0016020 // GO:0016021 // GO:0016020 // GO:0016021 // GO:0016020 // GO:0016021 // GO:0016020 // GO:0016021 // GO:0016020 // GO:0016021 // GO:0016020 // GO:0016021 // GO:0016020 // GO:0016021 // GO:0016020 // GO:0016021 // GO:0016020 // GO:0016021 // GO:0016020	membrane // integral to membrane // membrane // integral to membrane // membrane // integral to membrane // membrane // integral to membrane // membrane // integral to membrane // membrane // integral to membrane // membrane // integral to membrane // membrane // integral to membrane // membrane // integral to membrane // membrane // integral to membrane // membrane // integral to membrane // mem…	inferred from electronic annotation // inferred from electronic annotation // inferred from electronic annotation // inferred from electronic annotation // inferred from electronic annotation // inferred from electronic annotation // inferred from electronic annotation // inferred from electronic annotation // --- // --- // inferred from electronic annotation // inferred from electronic annotatio…	GO:0000166 // GO:0005524 // GO:0015662 // GO:0016787 // GO:0016820 // GO:0016887 // GO:0046872 // GO:0000166 // GO:0005524 // GO:0015662 // GO:0016787 // GO:0016820 // GO:0016887 // GO:0046872 // GO:0000166 // GO:0005524 // GO:0015662 // GO:0016787 // GO:0016820 // GO:0016887 // GO:0046872 // GO:0000166 // GO:0005524 // GO:0015662 // GO:0016787 // GO:0016820 // GO:0016887 // GO:0046872 // GO:0015…	nucleotide binding // ATP binding // ATPase activity, coupled to transmembrane movement of ions, phosphorylative mechanism // hydrolase activity // hydrolase activity, acting on acid anhydrides, catalyzing transmembrane movement of substances // ATPase activity // metal ion binding // nucleotide binding // ATP binding // ATPase activity, coupled to transmembrane movement of ions, phosphorylative …	inferred from electronic annotation // inferred from electronic annotation // inferred from electronic annotation // inferred from electronic annotation // inferred from electronic annotation // inferred from electronic annotation // inferred from electronic annotation // inferred from electronic annotation // inferred from electronic annotation // inferred from electronic annotation // inferred …	---	---	---	---	---	main				ENST00000446261	7.56984	7.57103	7.63402	5.63287	5.2163	5.67878
16967794	CXCL1	chemokine (C-X-C motif) ligand 1 (melanoma growth stimulating activity, alpha)	coding	6.64E-5	0.00249	13.87	57.47	4.16667	up	NM_001511	RefSeq	Homo sapiens chemokine (C-X-C motif) ligand 1 (melanoma growth stimulating activity, alpha) (CXCL1), mRNA.	chr4	+	74735109	74736959	GO:0006935 // GO:0006954 // GO:0006955 // GO:0007165 // GO:0007186 // GO:0007399 // GO:0008283 // GO:0008285 // GO:0023034 // GO:0030036 // GO:0006935 // GO:0006954 // GO:0006955 // GO:0007165 // GO:0007186 // GO:0007399 // GO:0008283 // GO:0008285 // GO:0023034 // GO:0030036 // GO:0007186 // GO:0023034 // GO:0008283 // GO:0007165 // GO:0008285 // GO:0030036 // GO:0006935 // GO:0006954 // GO:0007…	chemotaxis // inflammatory response // immune response // signal transduction // G-protein coupled receptor protein signaling pathway // nervous system development // cell proliferation // negative regulation of cell proliferation // intracellular signaling pathway // actin cytoskeleton organization // chemotaxis // inflammatory response // immune response // signal transduction // G-protein coup…	traceable author statement // inferred from electronic annotation // inferred from electronic annotation // traceable author statement // traceable author statement // traceable author statement // traceable author statement // traceable author statement // traceable author statement // traceable author statement // traceable author statement // inferred from electronic annotation // inferred fro…	GO:0005576 // GO:0005615 // GO:0005576 // GO:0005615 // GO:0005615 // GO:0005576 // GO:0005576 // GO:0005615	extracellular region // extracellular space // extracellular region // extracellular space // extracellular space // extracellular region // extracellular region // extracellular space	not recorded // inferred from electronic annotation // not recorded // inferred from electronic annotation // --- // --- // not recorded // inferred from electronic annotation	GO:0005102 // GO:0008009 // GO:0008047 // GO:0008083 // GO:0005102 // GO:0008009 // GO:0008047 // GO:0008083 // GO:0005102 // GO:0008083 // GO:0008047 // GO:0008009 // GO:0005102 // GO:0008009 // GO:0008047 // GO:0008083	receptor binding // chemokine activity // enzyme activator activity // growth factor activity // receptor binding // chemokine activity // enzyme activator activity // growth factor activity // receptor binding // growth factor activity // enzyme activator activity // chemokine activity // receptor binding // chemokine activity // enzyme activator activity // growth factor activity	traceable author statement // inferred from electronic annotation // traceable author statement // inferred from electronic annotation // traceable author statement // inferred from electronic annotation // traceable author statement // inferred from electronic annotation // --- // --- // --- // --- // traceable author statement // inferred from electronic annotation // traceable author statement…	---	---	---	---	---	main					5.69708	5.51821	6.32711	3.94666	3.02191	4.36989
16924592	CYYR1	cysteine/tyrosine-rich 1	coding	6.0E-7	9.18E-5	4.29	17.66	4.16667	up	NM_052954	RefSeq	Homo sapiens cysteine/tyrosine-rich 1 (CYYR1), mRNA.	chr21	-	27838528	27945603	GO:0008150 // GO:0008150 // GO:0008150 // GO:0008150 // GO:0008150	biological_process // biological_process // biological_process // biological_process // biological_process	no biological data available // no biological data available // --- // no biological data available // no biological data available	GO:0016020 // GO:0016021 // GO:0016020 // GO:0016021 // GO:0016021 // GO:0016020 // GO:0016020 // GO:0016021 // GO:0016020 // GO:0016021	membrane // integral to membrane // membrane // integral to membrane // integral to membrane // membrane // membrane // integral to membrane // membrane // integral to membrane	inferred from electronic annotation // non-traceable author statement // inferred from electronic annotation // non-traceable author statement // --- // --- // inferred from electronic annotation // non-traceable author statement // inferred from electronic annotation // non-traceable author statement	GO:0003674 // GO:0003674 // GO:0003674 // GO:0003674 // GO:0003674	molecular_function // molecular_function // molecular_function // molecular_function // molecular_function	no biological data available // no biological data available // --- // no biological data available // no biological data available	---	---	---	---	---	main				ENST00000429340 AK125338	3.7592	4.11025	4.56715	1.94117	2.18738	2.12835
16890675	IGFBP2	insulin-like growth factor binding protein 2, 36kDa	coding	1.0E-7	2.22E-5	11.9	50.37	4.16667	up	NM_000597	RefSeq	Homo sapiens insulin-like growth factor binding protein 2, 36kDa (IGFBP2), mRNA.	chr2	+	217497551	217529159	GO:0001558 // GO:0006950 // GO:0007165 // GO:0007565 // GO:0007568 // GO:0007584 // GO:0009612 // GO:0010226 // GO:0032355 // GO:0032526 // GO:0032870 // GO:0042493 // GO:0043567 // GO:0043567 // GO:0051384 // GO:0001558 // GO:0006950 // GO:0007165 // GO:0007565 // GO:0007568 // GO:0007584 // GO:0009612 // GO:0010226 // GO:0032355 // GO:0032526 // GO:0032870 // GO:0042493 // GO:0043567 // GO:0043…	regulation of cell growth // response to stress // signal transduction // female pregnancy // aging // response to nutrient // response to mechanical stimulus // response to lithium ion // response to estradiol stimulus // response to retinoic acid // cellular response to hormone stimulus // response to drug // regulation of insulin-like growth factor receptor signaling pathway // regulation of i…	inferred from electronic annotation // inferred from electronic annotation // inferred from electronic annotation // inferred from electronic annotation // inferred from electronic annotation // inferred from electronic annotation // inferred from electronic annotation // inferred from electronic annotation // inferred from electronic annotation // inferred from electronic annotation // inferred …	GO:0005576 // GO:0005615 // GO:0016324 // GO:0031410 // GO:0005576 // GO:0005615 // GO:0016324 // GO:0031410 // GO:0031410 // GO:0005576 // GO:0005615 // GO:0016324 // GO:0005576 // GO:0005615 // GO:0016324 // GO:0031410	extracellular region // extracellular space // apical plasma membrane // cytoplasmic vesicle // extracellular region // extracellular space // apical plasma membrane // cytoplasmic vesicle // cytoplasmic vesicle // extracellular region // extracellular space // apical plasma membrane // extracellular region // extracellular space // apical plasma membrane // cytoplasmic vesicle	inferred from sequence or structural similarity // inferred from electronic annotation // inferred from electronic annotation // inferred from electronic annotation // inferred from sequence or structural similarity // inferred from electronic annotation // inferred from electronic annotation // inferred from electronic annotation // --- // --- // --- // --- // inferred from sequence or structura…	GO:0005515 // GO:0031994 // GO:0031995 // GO:0005515 // GO:0031994 // GO:0031995 // GO:0005515 // GO:0031994 // GO:0031995 // GO:0005520 // GO:0005515 // GO:0031994 // GO:0031995	protein binding // insulin-like growth factor I binding // insulin-like growth factor II binding // protein binding // insulin-like growth factor I binding // insulin-like growth factor II binding // protein binding // insulin-like growth factor I binding // insulin-like growth factor II binding // insulin-like growth factor binding // protein binding // insulin-like growth factor I binding // in…	inferred from physical interaction // inferred from direct assay // inferred from sequence or structural similarity // inferred from physical interaction // inferred from direct assay // inferred from sequence or structural similarity // --- // --- // --- // --- // inferred from physical interaction // inferred from direct assay // inferred from sequence or structural similarity	GenMAPP // GenMAPP	Smooth_muscle_contraction // Smooth_muscle_contraction	---	---	---	main					5.50522	5.97285	5.49321	3.55009	3.60799	3.51631
16687123	RAB3B	RAB3B, member RAS oncogene family	coding	< 1e-07	< 1e-07	12.46	51.05	4.16667	up	NM_002867	RefSeq	Homo sapiens RAB3B, member RAS oncogene family (RAB3B), mRNA.	chr1	-	52373628	52456436	GO:0007264 // GO:0015031 // GO:0017157 // GO:0018125 // GO:0007264 // GO:0015031 // GO:0017157 // GO:0018125 // GO:0017157 // GO:0015031 // GO:0018125 // GO:0007264 // GO:0006886 // GO:0006913 // GO:0007165 // GO:0007264 // GO:0015031 // GO:0017157 // GO:0018125	small GTPase mediated signal transduction // protein transport // regulation of exocytosis // peptidyl-cysteine methylation // small GTPase mediated signal transduction // protein transport // regulation of exocytosis // peptidyl-cysteine methylation // regulation of exocytosis // protein transport // peptidyl-cysteine methylation // small GTPase mediated signal transduction // intracellular prot…	inferred from electronic annotation // inferred from electronic annotation // inferred from electronic annotation // inferred from electronic annotation // inferred from electronic annotation // inferred from electronic annotation // inferred from electronic annotation // inferred from electronic annotation // --- // --- // --- // --- // --- // --- // --- // inferred from electronic annotation //…	GO:0005829 // GO:0005886 // GO:0008021 // GO:0005829 // GO:0005886 // GO:0008021 // GO:0008021 // GO:0005829 // GO:0005886 // GO:0005622 // GO:0005829 // GO:0005886 // GO:0008021	cytosol // plasma membrane // synaptic vesicle // cytosol // plasma membrane // synaptic vesicle // synaptic vesicle // cytosol // plasma membrane // intracellular // cytosol // plasma membrane // synaptic vesicle	inferred from electronic annotation // inferred from electronic annotation // inferred from electronic annotation // inferred from electronic annotation // inferred from electronic annotation // inferred from electronic annotation // --- // --- // --- // --- // inferred from electronic annotation // inferred from electronic annotation // inferred from electronic annotation	GO:0000166 // GO:0003924 // GO:0005515 // GO:0005525 // GO:0000166 // GO:0003924 // GO:0005515 // GO:0005525 // GO:0005525 // GO:0000166 // GO:0005515 // GO:0003924 // GO:0000166 // GO:0003924 // GO:0005515 // GO:0005525	nucleotide binding // GTPase activity // protein binding // GTP binding // nucleotide binding // GTPase activity // protein binding // GTP binding // GTP binding // nucleotide binding // protein binding // GTPase activity // nucleotide binding // GTPase activity // protein binding // GTP binding	inferred from electronic annotation // traceable author statement // inferred from electronic annotation // inferred from electronic annotation // inferred from electronic annotation // traceable author statement // inferred from electronic annotation // inferred from electronic annotation // --- // --- // --- // --- // inferred from electronic annotation // traceable author statement // inferred…	---	---	---	---	---	main					5.57483	5.61998	5.83518	3.70549	3.75127	3.41604
16926754	S100B	S100 calcium binding protein B	coding	6.26E-5	0.00237	3.88	16.46	4.16667	up	NM_006272	RefSeq	Homo sapiens S100 calcium binding protein B (S100B), mRNA.	chr21	-	48018531	48025121	GO:0007409 // GO:0007417 // GO:0007611 // GO:0008283 // GO:0043123 // GO:0007409 // GO:0007417 // GO:0007611 // GO:0008283 // GO:0043123 // GO:0043123 // GO:0007417 // GO:0008283 // GO:0007611 // GO:0007409 // GO:0007409 // GO:0007417 // GO:0007611 // GO:0008283 // GO:0043123 // GO:0043123 // GO:0007417 // GO:0008283 // GO:0007611 // GO:0007409 // GO:0007409 // GO:0007417 // GO:0007611 // GO:0008…	axonogenesis // central nervous system development // learning or memory // cell proliferation // positive regulation of I-kappaB kinase/NF-kappaB cascade // axonogenesis // central nervous system development // learning or memory // cell proliferation // positive regulation of I-kappaB kinase/NF-kappaB cascade // positive regulation of I-kappaB kinase/NF-kappaB cascade // central nervous system …	traceable author statement // traceable author statement // inferred from sequence or structural similarity // traceable author statement // inferred from direct assay // traceable author statement // traceable author statement // inferred from sequence or structural similarity // traceable author statement // inferred from direct assay // --- // --- // --- // --- // --- // traceable author state…	GO:0001726 // GO:0005634 // GO:0005737 // GO:0005737 // GO:0048471 // GO:0001726 // GO:0005634 // GO:0005737 // GO:0005737 // GO:0048471 // GO:0005737 // GO:0005634 // GO:0001726 // GO:0048471 // GO:0001726 // GO:0005634 // GO:0005737 // GO:0005737 // GO:0048471 // GO:0005737 // GO:0005634 // GO:0001726 // GO:0048471 // GO:0001726 // GO:0005634 // GO:0005737 // GO:0005737 // GO:0048471	ruffle // nucleus // cytoplasm // cytoplasm // perinuclear region of cytoplasm // ruffle // nucleus // cytoplasm // cytoplasm // perinuclear region of cytoplasm // cytoplasm // nucleus // ruffle // perinuclear region of cytoplasm // ruffle // nucleus // cytoplasm // cytoplasm // perinuclear region of cytoplasm // cytoplasm // nucleus // ruffle // perinuclear region of cytoplasm // ruffle // nucle…	inferred from direct assay // inferred from direct assay // inferred from direct assay // inferred from sequence or structural similarity // inferred from direct assay // inferred from direct assay // inferred from direct assay // inferred from direct assay // inferred from sequence or structural similarity // inferred from direct assay // --- // --- // --- // --- // inferred from direct assay //…	GO:0005509 // GO:0005515 // GO:0008270 // GO:0042802 // GO:0042803 // GO:0042803 // GO:0048154 // GO:0048156 // GO:0048306 // GO:0050786 // GO:0005509 // GO:0005515 // GO:0008270 // GO:0042802 // GO:0042803 // GO:0042803 // GO:0048154 // GO:0048156 // GO:0048306 // GO:0050786 // GO:0048154 // GO:0005515 // GO:0050786 // GO:0042803 // GO:0008270 // GO:0048306 // GO:0042802 // GO:0048156 // GO:0005…	calcium ion binding // protein binding // zinc ion binding // identical protein binding // protein homodimerization activity // protein homodimerization activity // S100 beta binding // tau protein binding // calcium-dependent protein binding // RAGE receptor binding // calcium ion binding // protein binding // zinc ion binding // identical protein binding // protein homodimerization activity // …	non-traceable author statement // inferred from physical interaction // inferred from sequence or structural similarity // inferred from physical interaction // inferred from direct assay // inferred from physical interaction // inferred from physical interaction // inferred from sequence or structural similarity // inferred from direct assay // inferred from physical interaction // non-traceable…	---	---	---	---	---	main					4.90397	3.30432	3.92315	2.0343	1.87105	1.91606
16935798	SCUBE1	signal peptide, CUB domain, EGF-like 1	coding	4.2E-6	3.53E-4	5.79	24.48	4.16667	up	NM_173050	RefSeq	Homo sapiens signal peptide, CUB domain, EGF-like 1 (SCUBE1), mRNA.	chr22	-	43599229	43739394	GO:0006954 // GO:0007512 // GO:0007596 // GO:0009791 // GO:0045446 // GO:0051260 // GO:0006954 // GO:0007512 // GO:0007596 // GO:0009791 // GO:0045446 // GO:0051260 // GO:0007512 // GO:0045446 // GO:0007596 // GO:0051260 // GO:0009791 // GO:0006954 // GO:0006954 // GO:0007512 // GO:0007596 // GO:0009791 // GO:0045446 // GO:0051260 // GO:0006954 // GO:0007512 // GO:0007596 // GO:0009791 // GO:0045…	inflammatory response // adult heart development // blood coagulation // post-embryonic development // endothelial cell differentiation // protein homooligomerization // inflammatory response // adult heart development // blood coagulation // post-embryonic development // endothelial cell differentiation // protein homooligomerization // adult heart development // endothelial cell differentiation…	non-traceable author statement // non-traceable author statement // non-traceable author statement // non-traceable author statement // non-traceable author statement // inferred from physical interaction // non-traceable author statement // non-traceable author statement // non-traceable author statement // non-traceable author statement // non-traceable author statement // inferred from physica…	GO:0005576 // GO:0005615 // GO:0005886 // GO:0009897 // GO:0009986 // GO:0019897 // GO:0005576 // GO:0005615 // GO:0005886 // GO:0009897 // GO:0009986 // GO:0019897 // GO:0009897 // GO:0005886 // GO:0009986 // GO:0005576 // GO:0005615 // GO:0019897 // GO:0005576 // GO:0005615 // GO:0005886 // GO:0009897 // GO:0009986 // GO:0019897 // GO:0005576 // GO:0005615 // GO:0005886 // GO:0009897 // GO:0009…	extracellular region // extracellular space // plasma membrane // external side of plasma membrane // cell surface // extrinsic to plasma membrane // extracellular region // extracellular space // plasma membrane // external side of plasma membrane // cell surface // extrinsic to plasma membrane // external side of plasma membrane // plasma membrane // cell surface // extracellular region // extr…	inferred from electronic annotation // inferred from direct assay // inferred from electronic annotation // inferred from direct assay // inferred from direct assay // inferred from direct assay // inferred from electronic annotation // inferred from direct assay // inferred from electronic annotation // inferred from direct assay // inferred from direct assay // inferred from direct assay // ---…	GO:0005509 // GO:0042802 // GO:0046982 // GO:0005509 // GO:0042802 // GO:0046982 // GO:0046982 // GO:0005509 // GO:0042802 // GO:0005509 // GO:0042802 // GO:0046982 // GO:0005509 // GO:0042802 // GO:0046982 // GO:0005509 // GO:0042802 // GO:0046982 // GO:0005509 // GO:0042802 // GO:0046982 // GO:0005509 // GO:0042802 // GO:0046982 // GO:0005509 // GO:0005509 // GO:0042802 // GO:0046982 // GO:0005…	calcium ion binding // identical protein binding // protein heterodimerization activity // calcium ion binding // identical protein binding // protein heterodimerization activity // protein heterodimerization activity // calcium ion binding // identical protein binding // calcium ion binding // identical protein binding // protein heterodimerization activity // calcium ion binding // identical pr…	traceable author statement // inferred from direct assay // inferred from direct assay // traceable author statement // inferred from direct assay // inferred from direct assay // --- // --- // --- // traceable author statement // inferred from direct assay // inferred from direct assay // traceable author statement // inferred from direct assay // inferred from direct assay // traceable author s…	---	---	---	---	---	main				ENST00000420269 ENST00000419643 ENST00000458463	4.20342	4.67112	4.97393	2.98522	2.16938	2.40307
16916682	SLC4A11	solute carrier family 4, sodium borate transporter, member 11	coding	5.0E-7	7.89E-5	9.93	41.68	4.16667	up	NM_032034	RefSeq	Homo sapiens solute carrier family 4, sodium borate transporter, member 11 (SLC4A11), transcript variant 2, mRNA.	chr20	-	3208063	3219887	GO:0006814 // GO:0006820 // GO:0009401 // GO:0015701 // GO:0015992 // GO:0030003 // GO:0042044 // GO:0046713 // GO:0006814 // GO:0006820 // GO:0009401 // GO:0015701 // GO:0015992 // GO:0030003 // GO:0042044 // GO:0046713 // GO:0006814 // GO:0006820 // GO:0009401 // GO:0015701 // GO:0015992 // GO:0030003 // GO:0042044 // GO:0046713 // GO:0006814 // GO:0006820 // GO:0009401 // GO:0015701 // GO:0015…	sodium ion transport // anion transport // phosphoenolpyruvate-dependent sugar phosphotransferase system // bicarbonate transport // proton transport // cellular cation homeostasis // fluid transport // boron transport // sodium ion transport // anion transport // phosphoenolpyruvate-dependent sugar phosphotransferase system // bicarbonate transport // proton transport // cellular cation homeosta…	inferred from direct assay // inferred from electronic annotation // inferred from electronic annotation // inferred from direct assay // inferred from direct assay // inferred from direct assay // inferred from sequence or structural similarity // inferred from direct assay // inferred from direct assay // inferred from electronic annotation // inferred from electronic annotation // inferred fro…	GO:0005886 // GO:0016021 // GO:0016323 // GO:0005886 // GO:0016021 // GO:0016323 // GO:0005886 // GO:0016021 // GO:0016323 // GO:0005886 // GO:0016021 // GO:0016323 // GO:0016323 // GO:0005886 // GO:0016021 // GO:0005886 // GO:0016021 // GO:0016323 // GO:0016021 // GO:0005886 // GO:0016021 // GO:0016323 // GO:0005886 // GO:0016021 // GO:0016323	plasma membrane // integral to membrane // basolateral plasma membrane // plasma membrane // integral to membrane // basolateral plasma membrane // plasma membrane // integral to membrane // basolateral plasma membrane // plasma membrane // integral to membrane // basolateral plasma membrane // basolateral plasma membrane // plasma membrane // integral to membrane // plasma membrane // integral t…	inferred from electronic annotation // inferred from electronic annotation // traceable author statement // inferred from electronic annotation // inferred from electronic annotation // traceable author statement // inferred from electronic annotation // inferred from electronic annotation // traceable author statement // inferred from electronic annotation // inferred from electronic annotation …	GO:0005215 // GO:0005272 // GO:0005351 // GO:0005452 // GO:0015106 // GO:0015252 // GO:0015293 // GO:0046715 // GO:0005215 // GO:0005272 // GO:0005351 // GO:0005452 // GO:0015106 // GO:0015252 // GO:0015293 // GO:0046715 // GO:0005215 // GO:0005272 // GO:0005351 // GO:0005452 // GO:0015106 // GO:0015252 // GO:0015293 // GO:0046715 // GO:0005215 // GO:0005272 // GO:0005351 // GO:0005452 // GO:0015…	transporter activity // sodium channel activity // sugar:hydrogen symporter activity // inorganic anion exchanger activity // bicarbonate transmembrane transporter activity // hydrogen ion channel activity // symporter activity // boron transmembrane transporter activity // transporter activity // sodium channel activity // sugar:hydrogen symporter activity // inorganic anion exchanger activity /…	inferred from electronic annotation // inferred from direct assay // inferred from electronic annotation // inferred from electronic annotation // inferred from direct assay // inferred from direct assay // inferred from electronic annotation // inferred from direct assay // inferred from electronic annotation // inferred from direct assay // inferred from electronic annotation // inferred from e…	---	---	---	---	---	main					5.40493	5.15119	5.59621	3.50303	3.50325	2.88247
16922114	HUNK	hormonally up-regulated Neu-associated kinase	coding	1.0E-7	2.22E-5	4.74	18.64	4	up	NM_014586	RefSeq	Homo sapiens hormonally up-regulated Neu-associated kinase (HUNK), mRNA.	chr21	+	33245628	33416946	GO:0006468 // GO:0007165 // GO:0007275 // GO:0006468 // GO:0007165 // GO:0007275 // GO:0007275 // GO:0007165 // GO:0006468	protein phosphorylation // signal transduction // multicellular organismal development // protein phosphorylation // signal transduction // multicellular organismal development // multicellular organismal development // signal transduction // protein amino acid phosphorylation	inferred from electronic annotation // traceable author statement // traceable author statement // inferred from electronic annotation // traceable author statement // traceable author statement // --- // --- // ---	---	---	---	GO:0000166 // GO:0004674 // GO:0005524 // GO:0016740 // GO:0000166 // GO:0004674 // GO:0005524 // GO:0016740 // GO:0004674 // GO:0005524 // GO:0000166 // GO:0016740 // GO:0004672	nucleotide binding // protein serine/threonine kinase activity // ATP binding // transferase activity // nucleotide binding // protein serine/threonine kinase activity // ATP binding // transferase activity // protein serine/threonine kinase activity // ATP binding // nucleotide binding // transferase activity // protein kinase activity	inferred from electronic annotation // inferred from electronic annotation // inferred from electronic annotation // inferred from electronic annotation // inferred from electronic annotation // inferred from electronic annotation // inferred from electronic annotation // inferred from electronic annotation // --- // --- // --- // --- // ---	---	---	Pfam	IPR001245	Tyrosine protein kinase	main				TCONS_00028914-XLOC_014052	4.47109	4.02395	4.17446	2.2357	2.14134	2.31704
17108959	KAL1	Kallmann syndrome 1 sequence	coding	9.0E-7	1.21E-4	10.28	41.08	4	up	NM_000216	RefSeq	Homo sapiens Kallmann syndrome 1 sequence (KAL1), mRNA.	chrX	-	8496915	8700227	GO:0006928 // GO:0006935 // GO:0007155 // GO:0007411 // GO:0006928 // GO:0006935 // GO:0007155 // GO:0007411 // GO:0006935 // GO:0007411 // GO:0007155 // GO:0006928 // GO:0006928 // GO:0006935 // GO:0007155 // GO:0007411	cellular component movement // chemotaxis // cell adhesion // axon guidance // cellular component movement // chemotaxis // cell adhesion // axon guidance // chemotaxis // axon guidance // cell adhesion // cellular component movement // cellular component movement // chemotaxis // cell adhesion // axon guidance	traceable author statement // traceable author statement // inferred from electronic annotation // traceable author statement // traceable author statement // traceable author statement // inferred from electronic annotation // traceable author statement // --- // --- // --- // --- // traceable author statement // traceable author statement // inferred from electronic annotation // traceable auth…	GO:0005576 // GO:0005578 // GO:0005615 // GO:0009986 // GO:0005576 // GO:0005578 // GO:0005615 // GO:0009986 // GO:0005578 // GO:0009986 // GO:0005576 // GO:0005615 // GO:0005576 // GO:0005578 // GO:0005615 // GO:0009986	extracellular region // proteinaceous extracellular matrix // extracellular space // cell surface // extracellular region // proteinaceous extracellular matrix // extracellular space // cell surface // proteinaceous extracellular matrix // cell surface // extracellular region // extracellular space // extracellular region // proteinaceous extracellular matrix // extracellular space // cell surface	inferred from electronic annotation // traceable author statement // traceable author statement // inferred from electronic annotation // inferred from electronic annotation // traceable author statement // traceable author statement // inferred from electronic annotation // --- // --- // --- // --- // inferred from electronic annotation // traceable author statement // traceable author statement…	GO:0004867 // GO:0005201 // GO:0030414 // GO:0004867 // GO:0005201 // GO:0030414 // GO:0004867 // GO:0030414 // GO:0005201 // GO:0004867 // GO:0005201 // GO:0030414	serine-type endopeptidase inhibitor activity // extracellular matrix structural constituent // peptidase inhibitor activity // serine-type endopeptidase inhibitor activity // extracellular matrix structural constituent // peptidase inhibitor activity // serine-type endopeptidase inhibitor activity // peptidase inhibitor activity // extracellular matrix structural constituent // serine-type endope…	inferred from electronic annotation // traceable author statement // inferred from electronic annotation // inferred from electronic annotation // traceable author statement // inferred from electronic annotation // --- // --- // --- // inferred from electronic annotation // traceable author statement // inferred from electronic annotation	---	---	---	---	---	main					5.51978	4.98198	5.58702	3.3216	3.09326	3.62591
16986777	RASGRF2	Ras protein-specific guanine nucleotide-releasing factor 2	coding	< 1e-07	< 1e-07	4.54	18.01	4	up	NM_006909	RefSeq	Homo sapiens Ras protein-specific guanine nucleotide-releasing factor 2 (RASGRF2), mRNA.	chr5	+	80256491	80525981	GO:0006915 // GO:0008624 // GO:0035023 // GO:0051056 // GO:0006915 // GO:0008624 // GO:0035023 // GO:0051056 // GO:0051056 // GO:0035023 // GO:0008624 // GO:0006915 // GO:0007264 // GO:0006915 // GO:0008624 // GO:0035023 // GO:0051056 // GO:0006915 // GO:0008624 // GO:0035023 // GO:0051056 // GO:0035023 // GO:0051056 // GO:0007264	apoptosis // induction of apoptosis by extracellular signals // regulation of Rho protein signal transduction // regulation of small GTPase mediated signal transduction // apoptosis // induction of apoptosis by extracellular signals // regulation of Rho protein signal transduction // regulation of small GTPase mediated signal transduction // regulation of small GTPase mediated signal transduction…	not recorded // not recorded // inferred from electronic annotation // inferred from electronic annotation // not recorded // not recorded // inferred from electronic annotation // inferred from electronic annotation // --- // --- // --- // --- // --- // not recorded // not recorded // inferred from electronic annotation // inferred from electronic annotation // not recorded // not recorded // in…	GO:0005622 // GO:0005737 // GO:0005783 // GO:0005789 // GO:0005829 // GO:0005886 // GO:0005622 // GO:0005737 // GO:0005783 // GO:0005789 // GO:0005829 // GO:0005886 // GO:0005622 // GO:0005886 // GO:0005789 // GO:0005737 // GO:0005783 // GO:0005829 // GO:0005622 // GO:0005737 // GO:0005783 // GO:0005789 // GO:0005829 // GO:0005886 // GO:0005622 // GO:0005737 // GO:0005783 // GO:0005789 // GO:0005…	intracellular // cytoplasm // endoplasmic reticulum // endoplasmic reticulum membrane // cytosol // plasma membrane // intracellular // cytoplasm // endoplasmic reticulum // endoplasmic reticulum membrane // cytosol // plasma membrane // intracellular // plasma membrane // endoplasmic reticulum membrane // cytoplasm // endoplasmic reticulum // cytosol // intracellular // cytoplasm // endoplasmic …	inferred from electronic annotation // inferred from direct assay // inferred from electronic annotation // inferred from electronic annotation // not recorded // not recorded // inferred from electronic annotation // inferred from direct assay // inferred from electronic annotation // inferred from electronic annotation // not recorded // not recorded // --- // --- // --- // --- // --- // --- //…	GO:0005085 // GO:0005089 // GO:0005515 // GO:0005085 // GO:0005089 // GO:0005515 // GO:0005085 // GO:0005515 // GO:0005089 // GO:0005085 // GO:0005089 // GO:0005515 // GO:0005085 // GO:0005089 // GO:0005515 // GO:0005089 // GO:0005085	guanyl-nucleotide exchange factor activity // Rho guanyl-nucleotide exchange factor activity // protein binding // guanyl-nucleotide exchange factor activity // Rho guanyl-nucleotide exchange factor activity // protein binding // guanyl-nucleotide exchange factor activity // protein binding // Rho guanyl-nucleotide exchange factor activity // guanyl-nucleotide exchange factor activity // Rho guan…	not recorded // inferred from electronic annotation // inferred from physical interaction // not recorded // inferred from electronic annotation // inferred from physical interaction // --- // --- // --- // not recorded // inferred from electronic annotation // inferred from physical interaction // not recorded // inferred from electronic annotation // inferred from physical interaction // --- //…	---	---	---	---	---	main				TCONS_00009714-XLOC_004907 ENST00000508993 NR_034122	4.07679	4.27074	4.17162	2.37747	2.15455	1.97531
16777571	SHISA2	shisa homolog 2 (Xenopus laevis)	coding	5.1E-6	4.0E-4	13.76	55.42	4	up	NM_001007538	RefSeq	Homo sapiens shisa homolog 2 (Xenopus laevis) (SHISA2), mRNA.	chr13	-	26618735	26625198	GO:0007275 // GO:0007275 // GO:0007275 // GO:0007275	multicellular organismal development // multicellular organismal development // multicellular organismal development // multicellular organismal development	inferred from electronic annotation // inferred from electronic annotation // --- // inferred from electronic annotation	GO:0005783 // GO:0005789 // GO:0016020 // GO:0016021 // GO:0005783 // GO:0005789 // GO:0016020 // GO:0016021 // GO:0005783 // GO:0016021 // GO:0005789 // GO:0016020 // GO:0005783 // GO:0005789 // GO:0016020 // GO:0016021	endoplasmic reticulum // endoplasmic reticulum membrane // membrane // integral to membrane // endoplasmic reticulum // endoplasmic reticulum membrane // membrane // integral to membrane // endoplasmic reticulum // integral to membrane // endoplasmic reticulum membrane // membrane // endoplasmic reticulum // endoplasmic reticulum membrane // membrane // integral to membrane	inferred from electronic annotation // inferred from electronic annotation // inferred from electronic annotation // inferred from electronic annotation // inferred from electronic annotation // inferred from electronic annotation // inferred from electronic annotation // inferred from electronic annotation // --- // --- // --- // --- // inferred from electronic annotation // inferred from electr…	---	---	---	---	---	---	---	---	main	TCONS_00021614-XLOC_010538 1216bp;				6.30271	5.68396	5.3985	3.63374	3.56717	4.10036
16852389	DCC	deleted in colorectal carcinoma	coding	1.4E-6	1.65E-4	3.51	13.69	3.84615	up	NM_005215	RefSeq	Homo sapiens deleted in colorectal carcinoma (DCC), mRNA.	chr18	+	49866542	51062273	GO:0001764 // GO:0001975 // GO:0006915 // GO:0006917 // GO:0007275 // GO:0007409 // GO:0010976 // GO:0021965 // GO:0033563 // GO:0070374 // GO:0001764 // GO:0001975 // GO:0006915 // GO:0006917 // GO:0007275 // GO:0007409 // GO:0010976 // GO:0021965 // GO:0033563 // GO:0070374 // GO:0033563 // GO:0070374 // GO:0001764 // GO:0021965 // GO:0006917 // GO:0010976 // GO:0007275 // GO:0006915 // GO:0007…	neuron migration // response to amphetamine // apoptosis // induction of apoptosis // multicellular organismal development // axonogenesis // positive regulation of neuron projection development // spinal cord ventral commissure morphogenesis // dorsal/ventral axon guidance // positive regulation of ERK1 and ERK2 cascade // neuron migration // response to amphetamine // apoptosis // induction of …	inferred from electronic annotation // inferred from electronic annotation // inferred from electronic annotation // traceable author statement // inferred from electronic annotation // traceable author statement // inferred from electronic annotation // inferred from electronic annotation // inferred from electronic annotation // inferred from electronic annotation // inferred from electronic an…	GO:0005886 // GO:0016021 // GO:0030424 // GO:0032584 // GO:0045121 // GO:0005886 // GO:0016021 // GO:0030424 // GO:0032584 // GO:0045121 // GO:0030424 // GO:0016020 // GO:0032584 // GO:0016021 // GO:0045121 // GO:0005886 // GO:0016021 // GO:0030424 // GO:0032584 // GO:0045121 // GO:0016021 // GO:0005886 // GO:0016021 // GO:0030424 // GO:0032584 // GO:0045121 // GO:0005886 // GO:0016021 // GO:0030…	plasma membrane // integral to membrane // axon // growth cone membrane // membrane raft // plasma membrane // integral to membrane // axon // growth cone membrane // membrane raft // axon // membrane // growth cone membrane // integral to membrane // membrane raft // plasma membrane // integral to membrane // axon // growth cone membrane // membrane raft // integral to membrane // plasma membran…	not recorded // inferred from electronic annotation // inferred from electronic annotation // inferred from electronic annotation // inferred from electronic annotation // not recorded // inferred from electronic annotation // inferred from electronic annotation // inferred from electronic annotation // inferred from electronic annotation // --- // --- // --- // --- // --- // not recorded // infe…	GO:0003713 // GO:0004888 // GO:0005042 // GO:0005515 // GO:0042802 // GO:0003713 // GO:0004888 // GO:0005042 // GO:0005515 // GO:0042802 // GO:0042802 // GO:0005515 // GO:0005042 // GO:0004888 // GO:0003713 // GO:0003713 // GO:0004888 // GO:0005042 // GO:0005515 // GO:0042802 // GO:0003713 // GO:0004888 // GO:0005042 // GO:0005515 // GO:0042802 // GO:0003713 // GO:0004888 // GO:0005042 // GO:0005…	transcription coactivator activity // transmembrane receptor activity // netrin receptor activity // protein binding // identical protein binding // transcription coactivator activity // transmembrane receptor activity // netrin receptor activity // protein binding // identical protein binding // identical protein binding // protein binding // netrin receptor activity // transmembrane receptor ac…	inferred from electronic annotation // traceable author statement // inferred from electronic annotation // inferred from physical interaction // inferred from electronic annotation // inferred from electronic annotation // traceable author statement // inferred from electronic annotation // inferred from physical interaction // inferred from electronic annotation // --- // --- // --- // --- // -…	---	---	---	---	---	main					3.73319	4.22796	3.37113	1.83264	1.70358	1.85584
16744415	IL18	interleukin 18 (interferon-gamma-inducing factor)	coding	1.34E-5	7.8E-4	4.35	16.5	3.84615	up	NM_001562	RefSeq	Homo sapiens interleukin 18 (interferon-gamma-inducing factor) (IL18), mRNA.	chr11	-	112013974	112034840	GO:0001525 // GO:0001666 // GO:0006955 // GO:0007267 // GO:0009409 // GO:0030155 // GO:0030431 // GO:0032729 // GO:0042033 // GO:0042088 // GO:0042092 // GO:0042094 // GO:0042095 // GO:0042104 // GO:0042231 // GO:0042253 // GO:0043525 // GO:0001525 // GO:0001666 // GO:0006955 // GO:0007267 // GO:0009409 // GO:0030155 // GO:0030431 // GO:0032729 // GO:0042033 // GO:0042088 // GO:0042092 // GO:0042…	angiogenesis // response to hypoxia // immune response // cell-cell signaling // response to cold // regulation of cell adhesion // sleep // positive regulation of interferon-gamma production // chemokine biosynthetic process // T-helper 1 type immune response // type 2 immune response // interleukin-2 biosynthetic process // interferon-gamma biosynthetic process // positive regulation of activat…	inferred from direct assay // inferred from electronic annotation // traceable author statement // traceable author statement // inferred from electronic annotation // inferred from direct assay // inferred from sequence or structural similarity // inferred from electronic annotation // traceable author statement // inferred from direct assay // traceable author statement // traceable author stat…	GO:0005576 // GO:0005615 // GO:0005576 // GO:0005615 // GO:0005576 // GO:0005615 // GO:0005576 // GO:0005615	extracellular region // extracellular space // extracellular region // extracellular space // extracellular region // extracellular space // extracellular region // extracellular space	traceable author statement // inferred from electronic annotation // traceable author statement // inferred from electronic annotation // --- // --- // traceable author statement // inferred from electronic annotation	GO:0004871 // GO:0005125 // GO:0004871 // GO:0005125 // GO:0005125 // GO:0004871 // GO:0004871 // GO:0005125	signal transducer activity // cytokine activity // signal transducer activity // cytokine activity // cytokine activity // signal transducer activity // signal transducer activity // cytokine activity	traceable author statement // traceable author statement // traceable author statement // traceable author statement // --- // --- // traceable author statement // traceable author statement	---	---	---	---	---	main					3.7911	4.591	3.75795	2.51323	2.02761	1.77261
17116301	NLGN4Y	neuroligin 4, Y-linked	coding	1.0E-7	2.22E-5	5.98	23.28	3.84615	up	NM_001164238	RefSeq	Homo sapiens neuroligin 4, Y-linked (NLGN4Y), transcript variant 2, mRNA.	chrY	+	16634488	16957530	GO:0007155 // GO:0007155 // GO:0007155 // GO:0007155 // GO:0007155 // GO:0007155 // GO:0007155 // GO:0007155 // GO:0007155 // GO:0007155 // GO:0007155 // GO:0007155 // GO:0007155 // GO:0007155	cell adhesion // cell adhesion // cell adhesion // cell adhesion // cell adhesion // cell adhesion // cell adhesion // cell adhesion // cell adhesion // cell adhesion // cell adhesion // cell adhesion // cell adhesion // cell adhesion	inferred from electronic annotation // inferred from electronic annotation // inferred from electronic annotation // inferred from electronic annotation // inferred from electronic annotation // --- // inferred from electronic annotation // inferred from electronic annotation // inferred from electronic annotation // --- // inferred from electronic annotation // inferred from electronic annotatio…	GO:0016020 // GO:0016021 // GO:0016020 // GO:0016021 // GO:0016020 // GO:0016021 // GO:0016020 // GO:0016021 // GO:0016020 // GO:0016021 // GO:0016021 // GO:0016020 // GO:0016020 // GO:0016021 // GO:0016020 // GO:0016021 // GO:0016020 // GO:0016021 // GO:0016021 // GO:0016020 // GO:0016020 // GO:0016021 // GO:0016020 // GO:0016021 // GO:0016020 // GO:0016021 // GO:0016020 // GO:0016021	membrane // integral to membrane // membrane // integral to membrane // membrane // integral to membrane // membrane // integral to membrane // membrane // integral to membrane // integral to membrane // membrane // membrane // integral to membrane // membrane // integral to membrane // membrane // integral to membrane // integral to membrane // membrane // membrane // integral to membrane // mem…	inferred from electronic annotation // inferred from electronic annotation // inferred from electronic annotation // inferred from electronic annotation // inferred from electronic annotation // inferred from electronic annotation // inferred from electronic annotation // inferred from electronic annotation // inferred from electronic annotation // inferred from electronic annotation // --- // --…	GO:0005515 // GO:0005515 // GO:0005515 // GO:0005515 // GO:0005515 // GO:0005515 // GO:0005515 // GO:0005515 // GO:0005515 // GO:0005515 // GO:0005515 // GO:0005515 // GO:0005515 // GO:0005515	protein binding // protein binding // protein binding // protein binding // protein binding // protein binding // protein binding // protein binding // protein binding // protein binding // protein binding // protein binding // protein binding // protein binding	inferred from physical interaction // inferred from physical interaction // inferred from physical interaction // inferred from physical interaction // inferred from physical interaction // --- // inferred from physical interaction // inferred from physical interaction // inferred from physical interaction // --- // inferred from physical interaction // inferred from physical interaction // infer…	---	---	Pfam	IPR002018	Carboxylesterase, type B	main				ENST00000434164	4.48644	4.57098	4.57416	2.29855	2.72386	2.67618
16675398	CFH	complement factor H	coding	< 1e-07	< 1e-07	143.06	521.45	3.7037	up	NM_000186	RefSeq	Homo sapiens complement factor H (CFH), transcript variant 1, mRNA.	chr1	+	196621008	196716634	GO:0006956 // GO:0006957 // GO:0006956 // GO:0006957 // GO:0006956 // GO:0006957 // GO:0006956 // GO:0006957 // GO:0006956 // GO:0006957 // GO:0006956 // GO:0006957 // GO:0006956 // GO:0006957 // GO:0006956 // GO:0006957 // GO:0006956 // GO:0006957 // GO:0006956 // GO:0006957 // GO:0006956 // GO:0006957	complement activation // complement activation, alternative pathway // complement activation // complement activation, alternative pathway // complement activation // complement activation, alternative pathway // complement activation // complement activation, alternative pathway // complement activation // complement activation, alternative pathway // complement activation // complement activati…	traceable author statement // inferred from electronic annotation // traceable author statement // inferred from electronic annotation // traceable author statement // inferred from electronic annotation // --- // --- // traceable author statement // inferred from electronic annotation // traceable author statement // inferred from electronic annotation // traceable author statement // inferred f…	GO:0005576 // GO:0005615 // GO:0005576 // GO:0005615 // GO:0005576 // GO:0005615 // GO:0005576 // GO:0005615 // GO:0005576 // GO:0005615 // GO:0005576 // GO:0005615 // GO:0005576 // GO:0005615 // GO:0005576 // GO:0005615 // GO:0005576 // GO:0005615 // GO:0005576 // GO:0005615 // GO:0005576 // GO:0005615	extracellular region // extracellular space // extracellular region // extracellular space // extracellular region // extracellular space // extracellular region // extracellular space // extracellular region // extracellular space // extracellular region // extracellular space // extracellular region // extracellular space // extracellular region // extracellular space // extracellular region //…	inferred from electronic annotation // traceable author statement // inferred from electronic annotation // traceable author statement // inferred from electronic annotation // traceable author statement // --- // --- // inferred from electronic annotation // traceable author statement // inferred from electronic annotation // traceable author statement // inferred from electronic annotation // t…	---	---	---	---	---	---	---	---	main					8.98298	8.9881	9.11623	7.15557	7.22391	7.05744
16696120	DPT	dermatopontin	coding	< 1e-07	< 1e-07	30.41	114.03	3.7037	up	NM_001937	RefSeq	Homo sapiens dermatopontin (DPT), mRNA.	chr1	-	168664695	168698502	GO:0007155 // GO:0008285 // GO:0030199 // GO:0007155 // GO:0008285 // GO:0030199 // GO:0030199 // GO:0008285 // GO:0007155 // GO:0007155 // GO:0008285 // GO:0030199	cell adhesion // negative regulation of cell proliferation // collagen fibril organization // cell adhesion // negative regulation of cell proliferation // collagen fibril organization // collagen fibril organization // negative regulation of cell proliferation // cell adhesion // cell adhesion // negative regulation of cell proliferation // collagen fibril organization	inferred from electronic annotation // inferred from electronic annotation // inferred from electronic annotation // inferred from electronic annotation // inferred from electronic annotation // inferred from electronic annotation // --- // --- // --- // inferred from electronic annotation // inferred from electronic annotation // inferred from electronic annotation	GO:0005576 // GO:0005578 // GO:0005615 // GO:0031012 // GO:0005576 // GO:0005578 // GO:0005615 // GO:0031012 // GO:0005578 // GO:0005615 // GO:0005576 // GO:0031012 // GO:0005576 // GO:0005578 // GO:0005615 // GO:0031012	extracellular region // proteinaceous extracellular matrix // extracellular space // extracellular matrix // extracellular region // proteinaceous extracellular matrix // extracellular space // extracellular matrix // proteinaceous extracellular matrix // extracellular space // extracellular region // extracellular matrix // extracellular region // proteinaceous extracellular matrix // extracellu…	inferred from electronic annotation // inferred from electronic annotation // inferred from direct assay // inferred from direct assay // inferred from electronic annotation // inferred from electronic annotation // inferred from direct assay // inferred from direct assay // --- // --- // --- // --- // inferred from electronic annotation // inferred from electronic annotation // inferred from dir…	---	---	---	---	---	---	---	---	main					6.91753	6.79748	6.79308	5.10571	4.72294	4.90649
16854486	DSC2	desmocollin 2	coding	2.0E-7	3.88E-5	18.16	68.38	3.7037	up	NM_024422	RefSeq	Homo sapiens desmocollin 2 (DSC2), transcript variant Dsc2a, mRNA.	chr18	-	28645940	28682388	GO:0007155 // GO:0007156 // GO:0007155 // GO:0007156 // GO:0007155 // GO:0007156 // GO:0007156 // GO:0007155 // GO:0007155 // GO:0007156 // GO:0007156 // GO:0007155 // GO:0007156 // GO:0007156 // GO:0007155 // GO:0007155 // GO:0007156 // GO:0007155 // GO:0007156 // GO:0007156 // GO:0007155	cell adhesion // homophilic cell adhesion // cell adhesion // homophilic cell adhesion // cell adhesion // homophilic cell adhesion // homophilic cell adhesion // cell adhesion // cell adhesion // homophilic cell adhesion // homophilic cell adhesion // cell adhesion // homophilic cell adhesion // homophilic cell adhesion // cell adhesion // cell adhesion // homophilic cell adhesion // cell adhesi…	inferred from electronic annotation // inferred from electronic annotation // inferred from electronic annotation // inferred from electronic annotation // inferred from electronic annotation // inferred from electronic annotation // --- // --- // inferred from electronic annotation // inferred from electronic annotation // --- // inferred from electronic annotation // inferred from electronic an…	GO:0005886 // GO:0016021 // GO:0030054 // GO:0030057 // GO:0005886 // GO:0016021 // GO:0030054 // GO:0030057 // GO:0005886 // GO:0016021 // GO:0030054 // GO:0030057 // GO:0005886 // GO:0030057 // GO:0030054 // GO:0016021 // GO:0016020 // GO:0005886 // GO:0016021 // GO:0030054 // GO:0030057 // GO:0016020 // GO:0005886 // GO:0016021 // GO:0030054 // GO:0030057 // GO:0016020 // GO:0005886 // GO:0005…	plasma membrane // integral to membrane // cell junction // desmosome // plasma membrane // integral to membrane // cell junction // desmosome // plasma membrane // integral to membrane // cell junction // desmosome // plasma membrane // desmosome // cell junction // integral to membrane // membrane // plasma membrane // integral to membrane // cell junction // desmosome // membrane // plasma mem…	inferred from electronic annotation // inferred from electronic annotation // inferred from electronic annotation // inferred from electronic annotation // inferred from electronic annotation // inferred from electronic annotation // inferred from electronic annotation // inferred from electronic annotation // inferred from electronic annotation // inferred from electronic annotation // inferred …	GO:0005509 // GO:0005509 // GO:0005509 // GO:0005509 // GO:0005509 // GO:0005509 // GO:0005509 // GO:0005509 // GO:0005509 // GO:0005509 // GO:0005509	calcium ion binding // calcium ion binding // calcium ion binding // calcium ion binding // calcium ion binding // calcium ion binding // calcium ion binding // calcium ion binding // calcium ion binding // calcium ion binding // calcium ion binding	inferred from electronic annotation // inferred from electronic annotation // inferred from electronic annotation // --- // inferred from electronic annotation // --- // inferred from electronic annotation // --- // inferred from electronic annotation // inferred from electronic annotation // ---	---	---	---	---	---	main					6.09308	6.06151	6.13992	4.44022	4.21811	3.84551
16722544	MRGPRX3	MAS-related GPR, member X3	coding	8.0E-7	1.1E-4	3.27	12.15	3.7037	up	NM_054031	RefSeq	Homo sapiens MAS-related GPR, member X3 (MRGPRX3), mRNA.	chr11	+	18142502	18160027	GO:0007186 // GO:0007186	G-protein coupled receptor protein signaling pathway // G-protein coupled receptor protein signaling pathway	--- // ---	GO:0005886 // GO:0016021 // GO:0005886 // GO:0016021 // GO:0016021 // GO:0005886 // GO:0005886 // GO:0016021 // GO:0016021 // GO:0005886 // GO:0005886 // GO:0016021	plasma membrane // integral to membrane // plasma membrane // integral to membrane // integral to membrane // plasma membrane // plasma membrane // integral to membrane // integral to membrane // plasma membrane // plasma membrane // integral to membrane	inferred from electronic annotation // inferred from electronic annotation // inferred from electronic annotation // inferred from electronic annotation // --- // --- // inferred from electronic annotation // inferred from electronic annotation // --- // --- // inferred from electronic annotation // inferred from electronic annotation	GO:0004872 // GO:0004930 // GO:0004872 // GO:0004930 // GO:0004930 // GO:0004872 // GO:0004872 // GO:0004930 // GO:0004930 // GO:0004872 // GO:0004872 // GO:0004930	receptor activity // G-protein coupled receptor activity // receptor activity // G-protein coupled receptor activity // G-protein coupled receptor activity // receptor activity // receptor activity // G-protein coupled receptor activity // G-protein coupled receptor activity // receptor activity // receptor activity // G-protein coupled receptor activity	inferred from electronic annotation // inferred from electronic annotation // inferred from electronic annotation // inferred from electronic annotation // --- // --- // inferred from electronic annotation // inferred from electronic annotation // --- // --- // inferred from electronic annotation // inferred from electronic annotation	---	---	---	---	---	main					3.6591	3.22446	3.93196	1.87556	1.5399	1.6677
17066065	SLC7A2	solute carrier family 7 (cationic amino acid transporter, y+ system), member 2	coding	5.14E-5	0.00206	13.27	48.99	3.7037	up	NM_003046	RefSeq	Homo sapiens solute carrier family 7 (cationic amino acid transporter, y+ system), member 2 (SLC7A2), transcript variant 1, mRNA.	chr8	+	17354597	17428082	GO:0006520 // GO:0006810 // GO:0006865 // GO:0055085 // GO:0006520 // GO:0006810 // GO:0006865 // GO:0055085 // GO:0006520 // GO:0006810 // GO:0006865 // GO:0055085 // GO:0006520 // GO:0006810 // GO:0006865 // GO:0055085 // GO:0006520 // GO:0006865 // GO:0006810 // GO:0055085 // GO:0006520 // GO:0006810 // GO:0006865 // GO:0055085 // GO:0006865 // GO:0006810 // GO:0055085 // GO:0006520 // GO:0006…	cellular amino acid metabolic process // transport // amino acid transport // transmembrane transport // cellular amino acid metabolic process // transport // amino acid transport // transmembrane transport // cellular amino acid metabolic process // transport // amino acid transport // transmembrane transport // cellular amino acid metabolic process // transport // amino acid transport // transm…	traceable author statement // traceable author statement // not recorded // inferred from electronic annotation // traceable author statement // traceable author statement // not recorded // inferred from electronic annotation // traceable author statement // traceable author statement // not recorded // inferred from electronic annotation // traceable author statement // traceable author stateme…	GO:0005624 // GO:0005887 // GO:0016020 // GO:0005624 // GO:0005887 // GO:0016020 // GO:0005624 // GO:0005887 // GO:0016020 // GO:0005624 // GO:0005887 // GO:0016020 // GO:0005887 // GO:0005624 // GO:0016020 // GO:0016021 // GO:0005624 // GO:0005887 // GO:0016020 // GO:0016021 // GO:0016020 // GO:0005624 // GO:0005887 // GO:0016020 // GO:0016021 // GO:0016020 // GO:0005624 // GO:0005887 // GO:0016…	membrane fraction // integral to plasma membrane // membrane // membrane fraction // integral to plasma membrane // membrane // membrane fraction // integral to plasma membrane // membrane // membrane fraction // integral to plasma membrane // membrane // integral to plasma membrane // membrane fraction // membrane // integral to membrane // membrane fraction // integral to plasma membrane // mem…	traceable author statement // traceable author statement // inferred from electronic annotation // traceable author statement // traceable author statement // inferred from electronic annotation // traceable author statement // traceable author statement // inferred from electronic annotation // traceable author statement // traceable author statement // inferred from electronic annotation // ---…	GO:0015174 // GO:0015174 // GO:0015174 // GO:0015174 // GO:0015174 // GO:0015171 // GO:0015174 // GO:0015174 // GO:0015181 // GO:0015179 // GO:0015189 // GO:0005289 // GO:0000064 // GO:0015174 // GO:0015174 // GO:0015171 // GO:0015174 // GO:0015174 // GO:0015171	basic amino acid transmembrane transporter activity // basic amino acid transmembrane transporter activity // basic amino acid transmembrane transporter activity // basic amino acid transmembrane transporter activity // basic amino acid transmembrane transporter activity // amino acid transmembrane transporter activity // basic amino acid transmembrane transporter activity // basic amino acid tra…	traceable author statement // traceable author statement // traceable author statement // traceable author statement // --- // --- // traceable author statement // traceable author statement // --- // --- // --- // --- // --- // traceable author statement // --- // --- // traceable author statement // --- // ---	---	---	---	---	---	main					5.62088	6.121	5.10964	3.85738	3.17148	4.11532
16724087	TSPAN18	tetraspanin 18	coding	5.1E-5	0.00205	7.21	26.96	3.7037	up	NM_130783	RefSeq	Homo sapiens tetraspanin 18 (TSPAN18), mRNA.	chr11	+	44748015	44953978	---	---	---	GO:0016020 // GO:0016021 // GO:0016020 // GO:0016021 // GO:0016020 // GO:0016021 // GO:0016020 // GO:0016021 // GO:0016020 // GO:0016021 // GO:0016021 // GO:0016020 // GO:0016021	membrane // integral to membrane // membrane // integral to membrane // membrane // integral to membrane // membrane // integral to membrane // membrane // integral to membrane // integral to membrane // membrane // integral to membrane	inferred from electronic annotation // inferred from electronic annotation // inferred from electronic annotation // inferred from electronic annotation // --- // --- // inferred from electronic annotation // inferred from electronic annotation // inferred from electronic annotation // inferred from electronic annotation // --- // --- // ---	---	---	---	---	---	---	---	---	main					3.94786	5.15938	5.1585	2.93509	2.93631	2.63553
17056105	HOXA2	homeobox A2	coding	1.9E-6	2.06E-4	11.24	39.78	3.57143	up	NM_006735	RefSeq	Homo sapiens homeobox A2 (HOXA2), mRNA.	chr7	-	27139721	27142430	GO:0000122 // GO:0001709 // GO:0002076 // GO:0006355 // GO:0007379 // GO:0008045 // GO:0009952 // GO:0009953 // GO:0021568 // GO:0021658 // GO:0035284 // GO:0042474 // GO:0045665 // GO:0045944 // GO:0048703 // GO:0048704 // GO:0000122 // GO:0001709 // GO:0002076 // GO:0006355 // GO:0007379 // GO:0008045 // GO:0009952 // GO:0009953 // GO:0021568 // GO:0021658 // GO:0035284 // GO:0042474 // GO:0045…	negative regulation of transcription from RNA polymerase II promoter // cell fate determination // osteoblast development // regulation of transcription, DNA-dependent // segment specification // motor axon guidance // anterior/posterior pattern formation // dorsal/ventral pattern formation // rhombomere 2 development // rhombomere 3 morphogenesis // brain segmentation // middle ear morphogenesis…	inferred from electronic annotation // inferred from electronic annotation // inferred from electronic annotation // inferred from electronic annotation // inferred from electronic annotation // inferred from electronic annotation // inferred from electronic annotation // inferred from electronic annotation // inferred from electronic annotation // inferred from electronic annotation // inferred …	GO:0005634 // GO:0005634 // GO:0005634 // GO:0005634	nucleus // nucleus // nucleus // nucleus	inferred from electronic annotation // inferred from electronic annotation // --- // inferred from electronic annotation	GO:0003700 // GO:0030528 // GO:0043565 // GO:0003700 // GO:0030528 // GO:0043565 // GO:0003700 // GO:0043565 // GO:0003700 // GO:0030528 // GO:0043565	sequence-specific DNA binding transcription factor activity // transcription regulator activity // sequence-specific DNA binding // sequence-specific DNA binding transcription factor activity // transcription regulator activity // sequence-specific DNA binding // sequence-specific DNA binding transcription factor activity // sequence-specific DNA binding // sequence-specific DNA binding transcrip…	inferred from electronic annotation // inferred from electronic annotation // inferred from electronic annotation // inferred from electronic annotation // inferred from electronic annotation // inferred from electronic annotation // --- // --- // inferred from electronic annotation // inferred from electronic annotation // inferred from electronic annotation	---	---	---	---	---	main				hotairm1	5.29534	5.33481	5.3202	3.15662	3.3215	3.94711
16820620	WWP2	WW domain containing E3 ubiquitin protein ligase 2	coding	1.8E-6	1.99E-4	67.91	241.28	3.57143	up	NM_007014	RefSeq	Homo sapiens WW domain containing E3 ubiquitin protein ligase 2 (WWP2), transcript variant 1, mRNA.	chr16	+	69796209	69975644	GO:0006464 // GO:0010629 // GO:0016567 // GO:0032410 // GO:0043161 // GO:0044419 // GO:0046718 // GO:0051224 // GO:0070534 // GO:0006464 // GO:0010629 // GO:0016567 // GO:0032410 // GO:0043161 // GO:0044419 // GO:0046718 // GO:0051224 // GO:0070534 // GO:0006464 // GO:0010629 // GO:0016567 // GO:0032410 // GO:0043161 // GO:0044419 // GO:0046718 // GO:0051224 // GO:0070534 // GO:0006464 // GO:0010…	protein modification process // negative regulation of gene expression // protein ubiquitination // negative regulation of transporter activity // proteasomal ubiquitin-dependent protein catabolic process // interspecies interaction between organisms // entry of virus into host cell // negative regulation of protein transport // protein K63-linked ubiquitination // protein modification process //…	inferred from electronic annotation // inferred from mutant phenotype // inferred from direct assay // inferred from direct assay // inferred from mutant phenotype // inferred from electronic annotation // traceable author statement // inferred from mutant phenotype // inferred from sequence or structural similarity // inferred from electronic annotation // inferred from mutant phenotype // infer…	GO:0000151 // GO:0005622 // GO:0005634 // GO:0000151 // GO:0005622 // GO:0005634 // GO:0000151 // GO:0005622 // GO:0005634 // GO:0000151 // GO:0005622 // GO:0005634 // GO:0005634 // GO:0000151 // GO:0005622 // GO:0000151 // GO:0005622 // GO:0005634 // GO:0005634 // GO:0000151 // GO:0005622 // GO:0000151 // GO:0005622 // GO:0005634 // GO:0005634 // GO:0000151 // GO:0005622 // GO:0000151 // GO:0005…	ubiquitin ligase complex // intracellular // nucleus // ubiquitin ligase complex // intracellular // nucleus // ubiquitin ligase complex // intracellular // nucleus // ubiquitin ligase complex // intracellular // nucleus // nucleus // ubiquitin ligase complex // intracellular // ubiquitin ligase complex // intracellular // nucleus // nucleus // ubiquitin ligase complex // intracellular // ubiquit…	traceable author statement // inferred from electronic annotation // inferred from direct assay // traceable author statement // inferred from electronic annotation // inferred from direct assay // traceable author statement // inferred from electronic annotation // inferred from direct assay // traceable author statement // inferred from electronic annotation // inferred from direct assay // ---…	GO:0004842 // GO:0004842 // GO:0005515 // GO:0008134 // GO:0016874 // GO:0016881 // GO:0004842 // GO:0004842 // GO:0005515 // GO:0008134 // GO:0016874 // GO:0016881 // GO:0004842 // GO:0004842 // GO:0005515 // GO:0008134 // GO:0016874 // GO:0016881 // GO:0004842 // GO:0004842 // GO:0005515 // GO:0008134 // GO:0016874 // GO:0016881 // GO:0004842 // GO:0008134 // GO:0016874 // GO:0005515 // GO:0016…	ubiquitin-protein ligase activity // ubiquitin-protein ligase activity // protein binding // transcription factor binding // ligase activity // acid-amino acid ligase activity // ubiquitin-protein ligase activity // ubiquitin-protein ligase activity // protein binding // transcription factor binding // ligase activity // acid-amino acid ligase activity // ubiquitin-protein ligase activity // ubiq…	inferred from direct assay // inferred from mutant phenotype // inferred from physical interaction // inferred from physical interaction // inferred from electronic annotation // inferred from electronic annotation // inferred from direct assay // inferred from mutant phenotype // inferred from physical interaction // inferred from physical interaction // inferred from electronic annotation // in…	---	---	---	---	---	main		NR_029681		ENST00000516634	8.09638	7.54515	8.11027	6.28064	5.7611	6.17045
17025989	DLL1	delta-like 1 (Drosophila)	coding	1.598E-4	0.00465	4.15	14.28	3.44828	up	NM_005618	RefSeq	Homo sapiens delta-like 1 (Drosophila) (DLL1), mRNA.	chr6	-	170591294	170599697	GO:0001709 // GO:0001757 // GO:0007154 // GO:0007219 // GO:0007275 // GO:0007368 // GO:0007386 // GO:0030097 // GO:0030154 // GO:0030155 // GO:0045596 // GO:0045608 // GO:0048839 // GO:0001709 // GO:0001757 // GO:0007154 // GO:0007219 // GO:0007275 // GO:0007368 // GO:0007386 // GO:0030097 // GO:0030154 // GO:0030155 // GO:0045596 // GO:0045608 // GO:0048839 // GO:0001709 // GO:0030154 // GO:0030…	cell fate determination // somite specification // cell communication // Notch signaling pathway // multicellular organismal development // determination of left/right symmetry // compartment pattern formation // hemopoiesis // cell differentiation // regulation of cell adhesion // negative regulation of cell differentiation // negative regulation of auditory receptor cell differentiation // inne…	non-traceable author statement // inferred from electronic annotation // inferred from electronic annotation // non-traceable author statement // inferred from electronic annotation // inferred from electronic annotation // inferred from electronic annotation // non-traceable author statement // traceable author statement // traceable author statement // inferred from electronic annotation // inf…	GO:0005576 // GO:0005886 // GO:0005887 // GO:0031410 // GO:0005576 // GO:0005886 // GO:0005887 // GO:0031410 // GO:0005887 // GO:0031410 // GO:0005886 // GO:0005576 // GO:0016020 // GO:0016021 // GO:0005576 // GO:0005886 // GO:0005887 // GO:0031410 // GO:0005576 // GO:0005886 // GO:0005887 // GO:0031410 // GO:0016020 // GO:0016021	extracellular region // plasma membrane // integral to plasma membrane // cytoplasmic vesicle // extracellular region // plasma membrane // integral to plasma membrane // cytoplasmic vesicle // integral to plasma membrane // cytoplasmic vesicle // plasma membrane // extracellular region // membrane // integral to membrane // extracellular region // plasma membrane // integral to plasma membrane /…	non-traceable author statement // inferred from electronic annotation // non-traceable author statement // inferred from electronic annotation // non-traceable author statement // inferred from electronic annotation // non-traceable author statement // inferred from electronic annotation // --- // --- // --- // --- // --- // --- // non-traceable author statement // inferred from electronic annota…	GO:0005112 // GO:0005509 // GO:0005515 // GO:0005112 // GO:0005509 // GO:0005515 // GO:0005112 // GO:0005515 // GO:0005509 // GO:0005112 // GO:0005509 // GO:0005515 // GO:0005112 // GO:0005509 // GO:0005515	Notch binding // calcium ion binding // protein binding // Notch binding // calcium ion binding // protein binding // Notch binding // protein binding // calcium ion binding // Notch binding // calcium ion binding // protein binding // Notch binding // calcium ion binding // protein binding	inferred from physical interaction // inferred from electronic annotation // inferred from physical interaction // inferred from physical interaction // inferred from electronic annotation // inferred from physical interaction // --- // --- // --- // inferred from physical interaction // inferred from electronic annotation // inferred from physical interaction // inferred from physical interactio…	---	---	---	---	---	main					3.08064	3.80716	4.62743	2.04147	2.17679	1.89879
16667694	GPR88	G protein-coupled receptor 88	coding	7.0E-7	1.01E-4	10.42	35.82	3.44828	up	NM_022049	RefSeq	Homo sapiens G protein-coupled receptor 88 (GPR88), mRNA.	chr1	+	101003693	101007583	GO:0007186 // GO:0007186 // GO:0007186 // GO:0007186 // GO:0007186 // GO:0007186	G-protein coupled receptor protein signaling pathway // G-protein coupled receptor protein signaling pathway // G-protein coupled receptor protein signaling pathway // G-protein coupled receptor protein signaling pathway // G-protein coupled receptor protein signaling pathway // G-protein coupled receptor protein signaling pathway	non-traceable author statement // non-traceable author statement // --- // non-traceable author statement // --- // non-traceable author statement	GO:0005575 // GO:0005886 // GO:0016021 // GO:0005575 // GO:0005886 // GO:0016021 // GO:0016021 // GO:0005575 // GO:0005886 // GO:0005575 // GO:0005886 // GO:0016021 // GO:0016021 // GO:0005575 // GO:0005886 // GO:0005575 // GO:0005886 // GO:0016021	cellular_component // plasma membrane // integral to membrane // cellular_component // plasma membrane // integral to membrane // integral to membrane // cellular_component // plasma membrane // cellular_component // plasma membrane // integral to membrane // integral to membrane // cellular_component // plasma membrane // cellular_component // plasma membrane // integral to membrane	no biological data available // inferred from electronic annotation // inferred from electronic annotation // no biological data available // inferred from electronic annotation // inferred from electronic annotation // --- // --- // --- // no biological data available // inferred from electronic annotation // inferred from electronic annotation // --- // --- // --- // no biological data availabl…	GO:0004872 // GO:0004930 // GO:0004872 // GO:0004930 // GO:0004930 // GO:0004872 // GO:0004872 // GO:0004930 // GO:0004930 // GO:0004872 // GO:0004872 // GO:0004930	receptor activity // G-protein coupled receptor activity // receptor activity // G-protein coupled receptor activity // G-protein coupled receptor activity // receptor activity // receptor activity // G-protein coupled receptor activity // G-protein coupled receptor activity // receptor activity // receptor activity // G-protein coupled receptor activity	inferred from electronic annotation // inferred from electronic annotation // inferred from electronic annotation // inferred from electronic annotation // --- // --- // inferred from electronic annotation // inferred from electronic annotation // --- // --- // inferred from electronic annotation // inferred from electronic annotation	GenMAPP // GenMAPP	GPCRDB_Other // GPCRDB_Other	---	---	---	main					4.95064	5.35834	5.18698	3.13987	3.29169	3.66936
17117126	KDM5D	lysine (K)-specific demethylase 5D	coding	< 1e-07	< 1e-07	7.86	27.5	3.44828	up	NM_001146705	RefSeq	Homo sapiens lysine (K)-specific demethylase 5D (KDM5D), transcript variant 1, mRNA.	chrY	-	21865751	21906825	GO:0007283 // GO:0016568 // GO:0055114 // GO:0007283 // GO:0016568 // GO:0055114 // GO:0007283 // GO:0016568 // GO:0055114 // GO:0007283 // GO:0016568 // GO:0055114 // GO:0016568 // GO:0055114 // GO:0007283 // GO:0007283 // GO:0016568 // GO:0055114 // GO:0007283 // GO:0016568 // GO:0055114 // GO:0007283 // GO:0016568 // GO:0055114 // GO:0007283 // GO:0016568 // GO:0055114	spermatogenesis // chromatin modification // oxidation reduction // spermatogenesis // chromatin modification // oxidation reduction // spermatogenesis // chromatin modification // oxidation reduction // spermatogenesis // chromatin modification // oxidation reduction // chromatin modification // oxidation reduction // spermatogenesis // spermatogenesis // chromatin modification // oxidation redu…	non-traceable author statement // inferred from electronic annotation // inferred from electronic annotation // non-traceable author statement // inferred from electronic annotation // inferred from electronic annotation // non-traceable author statement // inferred from electronic annotation // inferred from electronic annotation // non-traceable author statement // inferred from electronic anno…	GO:0005575 // GO:0005622 // GO:0005634 // GO:0005575 // GO:0005622 // GO:0005634 // GO:0005575 // GO:0005622 // GO:0005634 // GO:0005575 // GO:0005622 // GO:0005634 // GO:0005575 // GO:0005634 // GO:0005622 // GO:0005575 // GO:0005622 // GO:0005634 // GO:0005622 // GO:0005634 // GO:0005575 // GO:0005622 // GO:0005634 // GO:0005575 // GO:0005622 // GO:0005634 // GO:0005622 // GO:0005634 // GO:0005…	cellular_component // intracellular // nucleus // cellular_component // intracellular // nucleus // cellular_component // intracellular // nucleus // cellular_component // intracellular // nucleus // cellular_component // nucleus // intracellular // cellular_component // intracellular // nucleus // intracellular // nucleus // cellular_component // intracellular // nucleus // cellular_component //…	no biological data available // inferred from electronic annotation // inferred from electronic annotation // no biological data available // inferred from electronic annotation // inferred from electronic annotation // no biological data available // inferred from electronic annotation // inferred from electronic annotation // no biological data available // inferred from electronic annotation /…	GO:0003674 // GO:0003677 // GO:0005515 // GO:0008270 // GO:0016491 // GO:0016702 // GO:0046872 // GO:0003674 // GO:0003677 // GO:0005515 // GO:0008270 // GO:0016491 // GO:0016702 // GO:0046872 // GO:0003674 // GO:0003677 // GO:0005515 // GO:0008270 // GO:0016491 // GO:0016702 // GO:0046872 // GO:0003674 // GO:0003677 // GO:0005515 // GO:0008270 // GO:0016491 // GO:0016702 // GO:0046872 // GO:0003…	molecular_function // DNA binding // protein binding // zinc ion binding // oxidoreductase activity // oxidoreductase activity, acting on single donors with incorporation of molecular oxygen, incorporation of two atoms of oxygen // metal ion binding // molecular_function // DNA binding // protein binding // zinc ion binding // oxidoreductase activity // oxidoreductase activity, acting on single d…	no biological data available // inferred from electronic annotation // inferred from physical interaction // inferred from electronic annotation // inferred from electronic annotation // inferred from electronic annotation // inferred from electronic annotation // no biological data available // inferred from electronic annotation // inferred from physical interaction // inferred from electronic …	---	---	---	---	---	main					4.85713	4.7076	4.78728	3.07952	2.86288	2.93766
16853631	EPB41L3	erythrocyte membrane protein band 4.1-like 3	coding	1.0E-7	2.22E-5	27.63	91.69	3.33333	up	NM_012307	RefSeq	Homo sapiens erythrocyte membrane protein band 4.1-like 3 (EPB41L3), mRNA.	chr18	-	5392383	5630640	GO:0008150 // GO:0030866 // GO:0008150 // GO:0030866 // GO:0030866 // GO:0008150 // GO:0008150 // GO:0030866 // GO:0030866 // GO:0008150 // GO:0008150 // GO:0030866 // GO:0008150 // GO:0030866 // GO:0030866 // GO:0008150 // GO:0030866 // GO:0030866	biological_process // cortical actin cytoskeleton organization // biological_process // cortical actin cytoskeleton organization // cortical actin cytoskeleton organization // biological_process // biological_process // cortical actin cytoskeleton organization // cortical actin cytoskeleton organization // biological_process // biological_process // cortical actin cytoskeleton organization // bio…	no biological data available // inferred from electronic annotation // no biological data available // inferred from electronic annotation // --- // --- // no biological data available // inferred from electronic annotation // --- // --- // no biological data available // inferred from electronic annotation // no biological data available // inferred from electronic annotation // --- // no biolog…	GO:0005737 // GO:0005856 // GO:0005886 // GO:0005911 // GO:0019898 // GO:0033270 // GO:0044224 // GO:0005737 // GO:0005856 // GO:0005886 // GO:0005911 // GO:0019898 // GO:0033270 // GO:0044224 // GO:0005737 // GO:0044224 // GO:0005886 // GO:0019898 // GO:0005856 // GO:0033270 // GO:0005911 // GO:0005737 // GO:0005856 // GO:0005886 // GO:0005911 // GO:0019898 // GO:0033270 // GO:0044224 // GO:0005…	cytoplasm // cytoskeleton // plasma membrane // cell-cell junction // extrinsic to membrane // paranode region of axon // juxtaparanode region of axon // cytoplasm // cytoskeleton // plasma membrane // cell-cell junction // extrinsic to membrane // paranode region of axon // juxtaparanode region of axon // cytoplasm // juxtaparanode region of axon // plasma membrane // extrinsic to membrane // cy…	inferred from electronic annotation // inferred from electronic annotation // non-traceable author statement // inferred from direct assay // inferred from electronic annotation // inferred from electronic annotation // inferred from electronic annotation // inferred from electronic annotation // inferred from electronic annotation // non-traceable author statement // inferred from direct assay /…	GO:0003779 // GO:0005198 // GO:0005515 // GO:0003779 // GO:0005198 // GO:0005515 // GO:0005515 // GO:0003779 // GO:0005198 // GO:0008092 // GO:0003779 // GO:0005198 // GO:0005515 // GO:0005515 // GO:0003779 // GO:0005198 // GO:0008092 // GO:0003779 // GO:0005198 // GO:0005515 // GO:0003779 // GO:0005198 // GO:0005515 // GO:0008092 // GO:0003779 // GO:0005198 // GO:0003779 // GO:0005198 // GO:0005…	actin binding // structural molecule activity // protein binding // actin binding // structural molecule activity // protein binding // protein binding // actin binding // structural molecule activity // cytoskeletal protein binding // actin binding // structural molecule activity // protein binding // protein binding // actin binding // structural molecule activity // cytoskeletal protein bindin…	inferred from electronic annotation // inferred from electronic annotation // inferred from physical interaction // inferred from electronic annotation // inferred from electronic annotation // inferred from physical interaction // --- // --- // --- // --- // inferred from electronic annotation // inferred from electronic annotation // inferred from physical interaction // --- // --- // --- // --…	---	---	---	---	---	main		ENST00000516767		ENST00000516763	6.39649	6.56836	6.59952	4.59126	4.78449	4.94401
16971526	FHDC1	FH2 domain containing 1	coding	5.7E-6	4.27E-4	5.25	17.35	3.33333	up	NM_033393	RefSeq	Homo sapiens FH2 domain containing 1 (FHDC1), mRNA.	chr4	+	153857504	153900848	GO:0016043 // GO:0030036 // GO:0016043 // GO:0030036 // GO:0016043 // GO:0030036 // GO:0016043 // GO:0030036 // GO:0016043 // GO:0030036	cellular component organization // actin cytoskeleton organization // cellular component organization // actin cytoskeleton organization // cellular component organization // actin cytoskeleton organization // cellular component organization // actin cytoskeleton organization // cellular component organization // actin cytoskeleton organization	inferred from electronic annotation // inferred from electronic annotation // inferred from electronic annotation // inferred from electronic annotation // --- // --- // inferred from electronic annotation // inferred from electronic annotation // --- // ---	---	---	---	GO:0003779 // GO:0003779 // GO:0003779 // GO:0003779 // GO:0003779	actin binding // actin binding // actin binding // actin binding // actin binding	inferred from electronic annotation // inferred from electronic annotation // --- // inferred from electronic annotation // ---	---	---	---	---	---	main				BC039551	4.24373	3.69054	4.4237	2.43246	2.08674	2.61067
16677071	SERTAD4	SERTA domain containing 4	coding	6.0E-7	9.18E-5	5.19	17.03	3.33333	up	NM_019605	RefSeq	Homo sapiens SERTA domain containing 4 (SERTAD4), mRNA.	chr1	+	210406144	210419976	---	---	---	---	---	---	GO:0005515 // GO:0005515 // GO:0005515 // GO:0005515	protein binding // protein binding // protein binding // protein binding	inferred from physical interaction // inferred from physical interaction // --- // inferred from physical interaction	---	---	---	---	---	main				NR_024337	3.96391	4.39466	3.91929	2.19185	2.51969	2.37208
16762288	SOX5	SRY (sex determining region Y)-box 5	coding	3.0E-7	5.37E-5	5.64	19	3.33333	up	NM_006940	RefSeq	Homo sapiens SRY (sex determining region Y)-box 5 (SOX5), transcript variant 1, mRNA.	chr12	-	23682440	24715524	GO:0001701 // GO:0006366 // GO:0021953 // GO:0045165 // GO:0045449 // GO:0045892 // GO:0045944 // GO:0048709 // GO:0051216 // GO:0060164 // GO:0001701 // GO:0006366 // GO:0021953 // GO:0045165 // GO:0045449 // GO:0045892 // GO:0045944 // GO:0048709 // GO:0051216 // GO:0060164 // GO:0001701 // GO:0006366 // GO:0021953 // GO:0045165 // GO:0045449 // GO:0045892 // GO:0045944 // GO:0048709 // GO:0051…	in utero embryonic development // transcription from RNA polymerase II promoter // central nervous system neuron differentiation // cell fate commitment // regulation of transcription // negative regulation of transcription, DNA-dependent // positive regulation of transcription from RNA polymerase II promoter // oligodendrocyte differentiation // cartilage development // regulation of timing of n…	inferred from electronic annotation // traceable author statement // inferred from electronic annotation // inferred from electronic annotation // inferred from electronic annotation // inferred from electronic annotation // inferred from electronic annotation // inferred from electronic annotation // inferred from electronic annotation // inferred from electronic annotation // inferred from elec…	GO:0005634 // GO:0005634 // GO:0005634 // GO:0005634 // GO:0005634 // GO:0005634 // GO:0005634 // GO:0005634 // GO:0005634 // GO:0005634 // GO:0005634 // GO:0005634 // GO:0005634 // GO:0005634	nucleus // nucleus // nucleus // nucleus // nucleus // nucleus // nucleus // nucleus // nucleus // nucleus // nucleus // nucleus // nucleus // nucleus	inferred from electronic annotation // inferred from electronic annotation // inferred from electronic annotation // inferred from electronic annotation // --- // inferred from electronic annotation // --- // inferred from electronic annotation // --- // inferred from electronic annotation // inferred from electronic annotation // --- // inferred from electronic annotation // ---	GO:0003677 // GO:0003700 // GO:0005515 // GO:0010843 // GO:0046982 // GO:0003677 // GO:0003700 // GO:0005515 // GO:0010843 // GO:0046982 // GO:0003677 // GO:0003700 // GO:0005515 // GO:0010843 // GO:0046982 // GO:0003677 // GO:0003700 // GO:0005515 // GO:0010843 // GO:0046982 // GO:0005515 // GO:0003700 // GO:0010843 // GO:0046982 // GO:0003677 // GO:0003700 // GO:0003677 // GO:0003700 // GO:0005…	DNA binding // sequence-specific DNA binding transcription factor activity // protein binding // promoter binding // protein heterodimerization activity // DNA binding // sequence-specific DNA binding transcription factor activity // protein binding // promoter binding // protein heterodimerization activity // DNA binding // sequence-specific DNA binding transcription factor activity // protein b…	inferred from electronic annotation // inferred from electronic annotation // inferred from electronic annotation // inferred from electronic annotation // inferred from electronic annotation // inferred from electronic annotation // inferred from electronic annotation // inferred from electronic annotation // inferred from electronic annotation // inferred from electronic annotation // inferred …	---	---	---	---	---	main	NR_029451 4374bp;			NR_030625	3.94912	4.35832	4.44492	2.637	2.43387	2.37018
16834603	TMEM106A	transmembrane protein 106A	coding	2.21E-5	0.00109	10.38	34.29	3.33333	up	NM_145041	RefSeq	Homo sapiens transmembrane protein 106A (TMEM106A), mRNA.	chr17	+	41363894	41371589	GO:0008150 // GO:0008150 // GO:0008150 // GO:0008150	biological_process // biological_process // biological_process // biological_process	no biological data available // no biological data available // --- // no biological data available	GO:0005575 // GO:0016020 // GO:0016021 // GO:0005575 // GO:0016020 // GO:0016021 // GO:0016021 // GO:0005575 // GO:0016020 // GO:0005575 // GO:0016020 // GO:0016021	cellular_component // membrane // integral to membrane // cellular_component // membrane // integral to membrane // integral to membrane // cellular_component // membrane // cellular_component // membrane // integral to membrane	no biological data available // inferred from electronic annotation // inferred from electronic annotation // no biological data available // inferred from electronic annotation // inferred from electronic annotation // --- // --- // --- // no biological data available // inferred from electronic annotation // inferred from electronic annotation	GO:0003674 // GO:0003674 // GO:0003674 // GO:0003674	molecular_function // molecular_function // molecular_function // molecular_function	no biological data available // no biological data available // --- // no biological data available	---	---	---	---	---	main				BC073918	4.85553	4.97968	5.47196	3.50937	2.83559	3.7361
17116251	DDX3Y	DEAD (Asp-Glu-Ala-Asp) box polypeptide 3, Y-linked	coding	< 1e-07	< 1e-07	2.85	9.12	3.22581	up	NM_004660	RefSeq	Homo sapiens DEAD (Asp-Glu-Ala-Asp) box polypeptide 3, Y-linked (DDX3Y), transcript variant 2, mRNA.	chrY	+	15016019	15032390	---	---	---	GO:0005634 // GO:0005737 // GO:0005634 // GO:0005737 // GO:0005634 // GO:0005737 // GO:0005634 // GO:0005737 // GO:0005634 // GO:0005737 // GO:0005634 // GO:0005737 // GO:0005634 // GO:0005737 // GO:0005634 // GO:0005737 // GO:0005634 // GO:0005737 // GO:0005634 // GO:0005737	nucleus // cytoplasm // nucleus // cytoplasm // nucleus // cytoplasm // nucleus // cytoplasm // nucleus // cytoplasm // nucleus // cytoplasm // nucleus // cytoplasm // nucleus // cytoplasm // nucleus // cytoplasm // nucleus // cytoplasm	inferred from electronic annotation // inferred from direct assay // inferred from electronic annotation // inferred from direct assay // inferred from electronic annotation // inferred from direct assay // --- // --- // inferred from electronic annotation // inferred from direct assay // --- // --- // inferred from electronic annotation // inferred from direct assay // inferred from electronic a…	GO:0000166 // GO:0003677 // GO:0003723 // GO:0004386 // GO:0005524 // GO:0008026 // GO:0016787 // GO:0000166 // GO:0003677 // GO:0003723 // GO:0004386 // GO:0005524 // GO:0008026 // GO:0016787 // GO:0000166 // GO:0003677 // GO:0003723 // GO:0004386 // GO:0005524 // GO:0008026 // GO:0016787 // GO:0003677 // GO:0016787 // GO:0000166 // GO:0004386 // GO:0005524 // GO:0003723 // GO:0008026 // GO:0003…	nucleotide binding // DNA binding // RNA binding // helicase activity // ATP binding // ATP-dependent helicase activity // hydrolase activity // nucleotide binding // DNA binding // RNA binding // helicase activity // ATP binding // ATP-dependent helicase activity // hydrolase activity // nucleotide binding // DNA binding // RNA binding // helicase activity // ATP binding // ATP-dependent helicas…	inferred from electronic annotation // inferred from electronic annotation // inferred from electronic annotation // inferred from electronic annotation // inferred from electronic annotation // inferred from electronic annotation // inferred from electronic annotation // inferred from electronic annotation // inferred from electronic annotation // inferred from electronic annotation // inferred …	---	---	---	---	---	main					3.22578	3.07207	3.27853	1.46369	1.50337	1.52619
16765809	MMP19	matrix metallopeptidase 19	coding	1.0E-7	2.22E-5	25.62	83.06	3.22581	up	NM_002429	RefSeq	Homo sapiens matrix metallopeptidase 19 (MMP19), transcript variant 1, mRNA.	chr12	-	56229214	56236750	GO:0001525 // GO:0001541 // GO:0001542 // GO:0001554 // GO:0006508 // GO:0007275 // GO:0008152 // GO:0009725 // GO:0030154 // GO:0030574 // GO:0051591 // GO:0001525 // GO:0001541 // GO:0001542 // GO:0001554 // GO:0006508 // GO:0007275 // GO:0008152 // GO:0009725 // GO:0030154 // GO:0030574 // GO:0051591 // GO:0001541 // GO:0001554 // GO:0030154 // GO:0030574 // GO:0008152 // GO:0001525 // GO:0009…	angiogenesis // ovarian follicle development // ovulation from ovarian follicle // luteolysis // proteolysis // multicellular organismal development // metabolic process // response to hormone stimulus // cell differentiation // collagen catabolic process // response to cAMP // angiogenesis // ovarian follicle development // ovulation from ovarian follicle // luteolysis // proteolysis // multicel…	inferred from electronic annotation // inferred from electronic annotation // inferred from electronic annotation // inferred from electronic annotation // non-traceable author statement // inferred from electronic annotation // inferred from electronic annotation // inferred from electronic annotation // inferred from electronic annotation // inferred from electronic annotation // inferred from …	GO:0005576 // GO:0005578 // GO:0005576 // GO:0005578 // GO:0005576 // GO:0005578 // GO:0031012 // GO:0005576 // GO:0005578 // GO:0005576 // GO:0005578 // GO:0031012 // GO:0005576 // GO:0005578 // GO:0031012 // GO:0005576 // GO:0005578 // GO:0005576 // GO:0005578 // GO:0005576 // GO:0005578	extracellular region // proteinaceous extracellular matrix // extracellular region // proteinaceous extracellular matrix // extracellular region // proteinaceous extracellular matrix // extracellular matrix // extracellular region // proteinaceous extracellular matrix // extracellular region // proteinaceous extracellular matrix // extracellular matrix // extracellular region // proteinaceous ext…	inferred from electronic annotation // non-traceable author statement // inferred from electronic annotation // non-traceable author statement // --- // --- // --- // inferred from electronic annotation // non-traceable author statement // inferred from electronic annotation // non-traceable author statement // --- // inferred from electronic annotation // non-traceable author statement // --- //…	GO:0004222 // GO:0005509 // GO:0008233 // GO:0008270 // GO:0004222 // GO:0005509 // GO:0008233 // GO:0008270 // GO:0004222 // GO:0008233 // GO:0008270 // GO:0005509 // GO:0008237 // GO:0004222 // GO:0005509 // GO:0008233 // GO:0008270 // GO:0004222 // GO:0005509 // GO:0008233 // GO:0008270 // GO:0004222 // GO:0008270 // GO:0008237 // GO:0004222 // GO:0005509 // GO:0008233 // GO:0008270 // GO:0004…	metalloendopeptidase activity // calcium ion binding // peptidase activity // zinc ion binding // metalloendopeptidase activity // calcium ion binding // peptidase activity // zinc ion binding // metalloendopeptidase activity // peptidase activity // zinc ion binding // calcium ion binding // metallopeptidase activity // metalloendopeptidase activity // calcium ion binding // peptidase activity /…	inferred from electronic annotation // inferred from electronic annotation // inferred from electronic annotation // inferred from electronic annotation // inferred from electronic annotation // inferred from electronic annotation // inferred from electronic annotation // inferred from electronic annotation // --- // --- // --- // --- // --- // inferred from electronic annotation // inferred from…	GenMAPP // GenMAPP	Matrix_Metalloproteinases // Matrix_Metalloproteinases	---	---	---	main				NR_036476	6.30264	6.48199	6.3517	4.55187	4.60554	4.83566
16665796	SGIP1	SH3-domain GRB2-like (endophilin) interacting protein 1	coding	4.0E-7	6.77E-5	17.9	57.61	3.22581	up	NM_032291	RefSeq	Homo sapiens SH3-domain GRB2-like (endophilin) interacting protein 1 (SGIP1), mRNA.	chr1	+	66999066	67213982	GO:0006886 // GO:0016192 // GO:0006886 // GO:0016192 // GO:0006886 // GO:0016192 // GO:0006886 // GO:0016192 // GO:0006886 // GO:0016192 // GO:0006886 // GO:0016192 // GO:0006886 // GO:0016192 // GO:0006886 // GO:0016192 // GO:0006886 // GO:0016192 // GO:0006886 // GO:0016192 // GO:0006886 // GO:0016192 // GO:0006886 // GO:0016192 // GO:0006886 // GO:0016192 // GO:0006886 // GO:0016192 // GO:0006…	intracellular protein transport // vesicle-mediated transport // intracellular protein transport // vesicle-mediated transport // intracellular protein transport // vesicle-mediated transport // intracellular protein transport // vesicle-mediated transport // intracellular protein transport // vesicle-mediated transport // intracellular protein transport // vesicle-mediated transport // intracell…	inferred from electronic annotation // inferred from electronic annotation // inferred from electronic annotation // inferred from electronic annotation // --- // --- // inferred from electronic annotation // inferred from electronic annotation // inferred from electronic annotation // inferred from electronic annotation // inferred from electronic annotation // inferred from electronic annotatio…	GO:0005737 // GO:0030131 // GO:0005737 // GO:0030131 // GO:0005737 // GO:0030131 // GO:0005737 // GO:0030131 // GO:0005737 // GO:0030131 // GO:0005737 // GO:0030131 // GO:0005737 // GO:0030131 // GO:0005737 // GO:0030131 // GO:0030131 // GO:0005737 // GO:0030131 // GO:0030131 // GO:0005737 // GO:0030131 // GO:0030131 // GO:0005737 // GO:0030131 // GO:0005737 // GO:0030131 // GO:0030131 // GO:0005…	cytoplasm // clathrin adaptor complex // cytoplasm // clathrin adaptor complex // cytoplasm // clathrin adaptor complex // cytoplasm // clathrin adaptor complex // cytoplasm // clathrin adaptor complex // cytoplasm // clathrin adaptor complex // cytoplasm // clathrin adaptor complex // cytoplasm // clathrin adaptor complex // clathrin adaptor complex // cytoplasm // clathrin adaptor complex // cl…	inferred from direct assay // inferred from electronic annotation // inferred from direct assay // inferred from electronic annotation // --- // --- // inferred from direct assay // inferred from electronic annotation // inferred from direct assay // inferred from electronic annotation // inferred from direct assay // inferred from electronic annotation // inferred from direct assay // inferred f…	GO:0005515 // GO:0005515 // GO:0005515 // GO:0005515 // GO:0005515 // GO:0005515 // GO:0005515 // GO:0005515 // GO:0005515 // GO:0005515 // GO:0005515 // GO:0005515 // GO:0005515 // GO:0005515 // GO:0005515 // GO:0005515 // GO:0005515 // GO:0005515 // GO:0005515 // GO:0005515 // GO:0005515 // GO:0005515 // GO:0005515 // GO:0005515 // GO:0005515	protein binding // protein binding // protein binding // protein binding // protein binding // protein binding // protein binding // protein binding // protein binding // protein binding // protein binding // protein binding // protein binding // protein binding // protein binding // protein binding // protein binding // protein binding // protein binding // protein binding // protein binding // …	inferred from electronic annotation // inferred from electronic annotation // --- // inferred from electronic annotation // inferred from electronic annotation // inferred from electronic annotation // inferred from electronic annotation // inferred from electronic annotation // --- // inferred from electronic annotation // --- // inferred from electronic annotation // --- // inferred from electr…	---	---	---	---	---	main		NR_036060			5.77602	5.7466	6.03009	4.18279	3.89973	4.35875
17108003	BGN	biglycan	coding	< 1e-07	< 1e-07	886.64	2750.21	3.125	up	NM_001711	RefSeq	Homo sapiens biglycan (BGN), mRNA.	chrX	+	152760347	152775012	GO:0001974 // GO:0008150 // GO:0019800 // GO:0001974 // GO:0008150 // GO:0019800 // GO:0019800 // GO:0001974 // GO:0008150 // GO:0001974 // GO:0008150 // GO:0019800 // GO:0001974 // GO:0008150 // GO:0019800 // GO:0001974 // GO:0008150 // GO:0019800 // GO:0001974 // GO:0008150 // GO:0019800 // GO:0001974 // GO:0008150 // GO:0019800 // GO:0001974 // GO:0008150 // GO:0019800 // GO:0001974 // GO:0008…	blood vessel remodeling // biological_process // peptide cross-linking via chondroitin 4-sulfate glycosaminoglycan // blood vessel remodeling // biological_process // peptide cross-linking via chondroitin 4-sulfate glycosaminoglycan // peptide cross-linking via chondroitin 4-sulfate glycosaminoglycan // blood vessel remodeling // biological_process // blood vessel remodeling // biological_process…	inferred from electronic annotation // no biological data available // inferred from electronic annotation // inferred from electronic annotation // no biological data available // inferred from electronic annotation // --- // --- // --- // inferred from electronic annotation // no biological data available // inferred from electronic annotation // inferred from electronic annotation // no biolog…	GO:0005576 // GO:0005578 // GO:0009986 // GO:0030133 // GO:0031012 // GO:0042383 // GO:0044424 // GO:0005576 // GO:0005578 // GO:0009986 // GO:0030133 // GO:0031012 // GO:0042383 // GO:0044424 // GO:0005578 // GO:0005576 // GO:0030133 // GO:0031012 // GO:0009986 // GO:0044424 // GO:0042383 // GO:0005576 // GO:0005578 // GO:0009986 // GO:0030133 // GO:0031012 // GO:0042383 // GO:0044424 // GO:0005…	extracellular region // proteinaceous extracellular matrix // cell surface // transport vesicle // extracellular matrix // sarcolemma // intracellular part // extracellular region // proteinaceous extracellular matrix // cell surface // transport vesicle // extracellular matrix // sarcolemma // intracellular part // proteinaceous extracellular matrix // extracellular region // transport vesicle /…	inferred from electronic annotation // non-traceable author statement // inferred from electronic annotation // inferred from direct assay // inferred from direct assay // inferred from electronic annotation // inferred from electronic annotation // inferred from electronic annotation // non-traceable author statement // inferred from electronic annotation // inferred from direct assay // inferre…	GO:0005201 // GO:0005515 // GO:0005539 // GO:0050840 // GO:0005201 // GO:0005515 // GO:0005539 // GO:0050840 // GO:0005539 // GO:0050840 // GO:0005201 // GO:0005515 // GO:0005201 // GO:0005515 // GO:0005539 // GO:0050840 // GO:0005201 // GO:0005515 // GO:0005539 // GO:0050840 // GO:0005201 // GO:0005515 // GO:0005539 // GO:0050840 // GO:0005201 // GO:0005515 // GO:0005539 // GO:0050840 // GO:0005…	extracellular matrix structural constituent // protein binding // glycosaminoglycan binding // extracellular matrix binding // extracellular matrix structural constituent // protein binding // glycosaminoglycan binding // extracellular matrix binding // glycosaminoglycan binding // extracellular matrix binding // extracellular matrix structural constituent // protein binding // extracellular matr…	non-traceable author statement // inferred from electronic annotation // inferred from electronic annotation // inferred from electronic annotation // non-traceable author statement // inferred from electronic annotation // inferred from electronic annotation // inferred from electronic annotation // --- // --- // --- // --- // non-traceable author statement // inferred from electronic annotation…	---	---	---	---	---	main	ENST00000449690 7801bp;				11.367	11.4339	11.4832	9.78358	9.74639	9.802
17097955	C5	complement component 5	coding	2.0E-7	3.88E-5	16.21	50.98	3.125	up	NM_001735	RefSeq	Homo sapiens complement component 5 (C5), mRNA.	chr9	-	123714613	123837452	GO:0000187 // GO:0001701 // GO:0006935 // GO:0006950 // GO:0006954 // GO:0006957 // GO:0006958 // GO:0007166 // GO:0007186 // GO:0010575 // GO:0010760 // GO:0019835 // GO:0045766 // GO:0090197 // GO:0000187 // GO:0001701 // GO:0006935 // GO:0006950 // GO:0006954 // GO:0006957 // GO:0006958 // GO:0007166 // GO:0007186 // GO:0010575 // GO:0010760 // GO:0019835 // GO:0045766 // GO:0090197 // GO:0007…	activation of MAPK activity // in utero embryonic development // chemotaxis // response to stress // inflammatory response // complement activation, alternative pathway // complement activation, classical pathway // cell surface receptor linked signaling pathway // G-protein coupled receptor protein signaling pathway // positive regulation vascular endothelial growth factor production // negative…	traceable author statement // inferred from electronic annotation // traceable author statement // traceable author statement // inferred from electronic annotation // inferred from electronic annotation // inferred from electronic annotation // traceable author statement // traceable author statement // inferred from direct assay // inferred from direct assay // inferred from electronic annotati…	GO:0005576 // GO:0005579 // GO:0005615 // GO:0005576 // GO:0005579 // GO:0005615 // GO:0005576 // GO:0005579 // GO:0005615 // GO:0005576 // GO:0005579 // GO:0005615 // GO:0005576 // GO:0005579 // GO:0005615 // GO:0005576	extracellular region // membrane attack complex // extracellular space // extracellular region // membrane attack complex // extracellular space // extracellular region // membrane attack complex // extracellular space // extracellular region // membrane attack complex // extracellular space // extracellular region // membrane attack complex // extracellular space // extracellular region	not recorded // inferred from electronic annotation // inferred from electronic annotation // not recorded // inferred from electronic annotation // inferred from electronic annotation // --- // --- // --- // not recorded // inferred from electronic annotation // inferred from electronic annotation // not recorded // inferred from electronic annotation // inferred from electronic annotation // ---	GO:0004866 // GO:0005102 // GO:0008009 // GO:0004866 // GO:0005102 // GO:0008009 // GO:0008009 // GO:0004866 // GO:0005102 // GO:0005515 // GO:0004866 // GO:0005102 // GO:0008009 // GO:0004866 // GO:0005102 // GO:0008009 // GO:0004866	endopeptidase inhibitor activity // receptor binding // chemokine activity // endopeptidase inhibitor activity // receptor binding // chemokine activity // chemokine activity // endopeptidase inhibitor activity // receptor binding // protein binding // endopeptidase inhibitor activity // receptor binding // chemokine activity // endopeptidase inhibitor activity // receptor binding // chemokine ac…	inferred from electronic annotation // traceable author statement // traceable author statement // inferred from electronic annotation // traceable author statement // traceable author statement // --- // --- // --- // --- // inferred from electronic annotation // traceable author statement // traceable author statement // inferred from electronic annotation // traceable author statement // trace…	GenMAPP // GenMAPP	Complement_Activation_Classical // Complement_Activation_Classical	---	---	---	main					5.59828	5.75789	5.66797	4.08813	3.74696	4.17552
17070120	CRISPLD1	cysteine-rich secretory protein LCCL domain containing 1	coding	1.0E-7	2.22E-5	7	21.59	3.125	up	NM_031461	RefSeq	Homo sapiens cysteine-rich secretory protein LCCL domain containing 1 (CRISPLD1), mRNA.	chr8	+	75896708	75946793	---	---	---	GO:0005576 // GO:0005576 // GO:0005576 // GO:0005576	extracellular region // extracellular region // extracellular region // extracellular region	inferred from electronic annotation // inferred from electronic annotation // --- // inferred from electronic annotation	---	---	---	---	---	Pfam	IPR001283	Allergen V5/Tpx-1 related	main				ENST00000520778	4.45176	4.27129	4.58162	2.82793	2.64495	2.90591
16713309	FZD8	frizzled homolog 8 (Drosophila)	coding	1.0E-7	2.22E-5	17.05	53.33	3.125	up	NM_031866	RefSeq	Homo sapiens frizzled homolog 8 (Drosophila) (FZD8), mRNA.	chr10	-	35927177	35930362	GO:0001934 // GO:0007275 // GO:0030182 // GO:0060070 // GO:0001934 // GO:0007275 // GO:0030182 // GO:0060070 // GO:0007275 // GO:0001934 // GO:0060070 // GO:0030182 // GO:0007166 // GO:0033077 // GO:0001934 // GO:0007275 // GO:0030182 // GO:0060070	positive regulation of protein phosphorylation // multicellular organismal development // neuron differentiation // canonical Wnt receptor signaling pathway // positive regulation of protein phosphorylation // multicellular organismal development // neuron differentiation // canonical Wnt receptor signaling pathway // multicellular organismal development // positive regulation of protein amino ac…	inferred from electronic annotation // inferred from electronic annotation // inferred from sequence or structural similarity // inferred from electronic annotation // inferred from electronic annotation // inferred from electronic annotation // inferred from sequence or structural similarity // inferred from electronic annotation // --- // --- // --- // --- // --- // --- // inferred from electro…	GO:0005794 // GO:0016020 // GO:0016021 // GO:0005794 // GO:0016020 // GO:0016021 // GO:0005794 // GO:0016020 // GO:0016021 // GO:0005886 // GO:0005794 // GO:0016020 // GO:0016021	Golgi apparatus // membrane // integral to membrane // Golgi apparatus // membrane // integral to membrane // Golgi apparatus // membrane // integral to membrane // plasma membrane // Golgi apparatus // membrane // integral to membrane	inferred from electronic annotation // inferred from electronic annotation // traceable author statement // inferred from electronic annotation // inferred from electronic annotation // traceable author statement // --- // --- // --- // --- // inferred from electronic annotation // inferred from electronic annotation // traceable author statement	GO:0004930 // GO:0017147 // GO:0030165 // GO:0042813 // GO:0004930 // GO:0017147 // GO:0030165 // GO:0042813 // GO:0042813 // GO:0004930 // GO:0017147 // GO:0030165 // GO:0004888 // GO:0005515 // GO:0004930 // GO:0017147 // GO:0030165 // GO:0042813	G-protein coupled receptor activity // Wnt-protein binding // PDZ domain binding // Wnt receptor activity // G-protein coupled receptor activity // Wnt-protein binding // PDZ domain binding // Wnt receptor activity // Wnt receptor activity // G-protein coupled receptor activity // Wnt-protein binding // PDZ domain binding // transmembrane receptor activity // protein binding // G-protein coupled …	inferred from electronic annotation // inferred from electronic annotation // inferred from physical interaction // traceable author statement // inferred from electronic annotation // inferred from electronic annotation // inferred from physical interaction // traceable author statement // --- // --- // --- // --- // --- // --- // inferred from electronic annotation // inferred from electronic a…	GenMAPP	Wnt_signaling	---	---	---	main					5.71519	5.74938	5.75447	4.18263	3.8395	4.2071
16794719	LTBP2	latent transforming growth factor beta binding protein 2	coding	< 1e-07	< 1e-07	74.48	235.02	3.125	up	NM_000428	RefSeq	Homo sapiens latent transforming growth factor beta binding protein 2 (LTBP2), mRNA.	chr14	-	74964873	75079306	GO:0006605 // GO:0007179 // GO:0009306 // GO:0006605 // GO:0007179 // GO:0009306 // GO:0006605 // GO:0007179 // GO:0009306 // GO:0006605 // GO:0007179 // GO:0009306	protein targeting // transforming growth factor beta receptor signaling pathway // protein secretion // protein targeting // transforming growth factor beta receptor signaling pathway // protein secretion // protein targeting // transforming growth factor beta receptor signaling pathway // protein secretion // protein targeting // transforming growth factor beta receptor signaling pathway // prot…	traceable author statement // traceable author statement // traceable author statement // traceable author statement // traceable author statement // traceable author statement // --- // --- // --- // traceable author statement // traceable author statement // traceable author statement	GO:0005576 // GO:0005578 // GO:0005615 // GO:0031012 // GO:0005576 // GO:0005578 // GO:0005615 // GO:0031012 // GO:0005578 // GO:0005576 // GO:0005615 // GO:0031012 // GO:0005576 // GO:0005578 // GO:0005615 // GO:0031012	extracellular region // proteinaceous extracellular matrix // extracellular space // extracellular matrix // extracellular region // proteinaceous extracellular matrix // extracellular space // extracellular matrix // proteinaceous extracellular matrix // extracellular region // extracellular space // extracellular matrix // extracellular region // proteinaceous extracellular matrix // extracellu…	inferred from electronic annotation // traceable author statement // inferred from direct assay // inferred from direct assay // inferred from electronic annotation // traceable author statement // inferred from direct assay // inferred from direct assay // --- // --- // --- // --- // inferred from electronic annotation // traceable author statement // inferred from direct assay // inferred from …	GO:0005509 // GO:0005515 // GO:0019838 // GO:0005509 // GO:0005515 // GO:0019838 // GO:0005515 // GO:0019838 // GO:0005509 // GO:0005488 // GO:0005509 // GO:0005515 // GO:0019838	calcium ion binding // protein binding // growth factor binding // calcium ion binding // protein binding // growth factor binding // protein binding // growth factor binding // calcium ion binding // binding // calcium ion binding // protein binding // growth factor binding	inferred from electronic annotation // inferred from physical interaction // inferred from electronic annotation // inferred from electronic annotation // inferred from physical interaction // inferred from electronic annotation // --- // --- // --- // --- // inferred from electronic annotation // inferred from physical interaction // inferred from electronic annotation	---	---	---	---	---	main					7.93536	7.76832	7.93431	6.26501	6.12725	6.21974
16701110	MAP1LC3C	microtubule-associated protein 1 light chain 3 gamma	coding	5.0E-7	7.89E-5	17.59	54.55	3.125	up	NM_001004343	RefSeq	Homo sapiens microtubule-associated protein 1 light chain 3 gamma (MAP1LC3C), mRNA.	chr1	-	242158792	242162385	GO:0006914 // GO:0006914 // GO:0006914 // GO:0006914	autophagy // autophagy // autophagy // autophagy	inferred from electronic annotation // inferred from electronic annotation // --- // inferred from electronic annotation	GO:0000421 // GO:0005737 // GO:0005776 // GO:0005874 // GO:0012505 // GO:0031090 // GO:0031410 // GO:0000421 // GO:0005737 // GO:0005776 // GO:0005874 // GO:0012505 // GO:0031090 // GO:0031410 // GO:0012505 // GO:0005776 // GO:0031090 // GO:0031410 // GO:0005874 // GO:0000421 // GO:0005737 // GO:0000421 // GO:0005737 // GO:0005776 // GO:0005874 // GO:0012505 // GO:0031090 // GO:0031410	autophagic vacuole membrane // cytoplasm // autophagic vacuole // microtubule // endomembrane system // organelle membrane // cytoplasmic vesicle // autophagic vacuole membrane // cytoplasm // autophagic vacuole // microtubule // endomembrane system // organelle membrane // cytoplasmic vesicle // endomembrane system // autophagic vacuole // organelle membrane // cytoplasmic vesicle // microtubule…	inferred from electronic annotation // inferred from electronic annotation // inferred from sequence or structural similarity // inferred from electronic annotation // inferred from electronic annotation // inferred from sequence or structural similarity // inferred from electronic annotation // inferred from electronic annotation // inferred from electronic annotation // inferred from sequence o…	GO:0005515 // GO:0005515 // GO:0005515 // GO:0005515	protein binding // protein binding // protein binding // protein binding	inferred from physical interaction // inferred from physical interaction // --- // inferred from physical interaction	---	---	---	---	---	main					5.72306	5.56927	6.02461	4.10403	3.98109	4.28097
17059955	PDK4	pyruvate dehydrogenase kinase, isozyme 4	coding	2.0E-7	3.88E-5	39.13	120.6	3.125	up	NM_002612	RefSeq	Homo sapiens pyruvate dehydrogenase kinase, isozyme 4 (PDK4), mRNA.	chr7	-	95212809	95225925	GO:0005975 // GO:0006006 // GO:0007165 // GO:0010510 // GO:0018106 // GO:0005975 // GO:0006006 // GO:0007165 // GO:0010510 // GO:0018106 // GO:0010510 // GO:0007165 // GO:0018106 // GO:0006006 // GO:0005975 // GO:0006468 // GO:0005975 // GO:0006006 // GO:0007165 // GO:0010510 // GO:0018106	carbohydrate metabolic process // glucose metabolic process // signal transduction // regulation of acetyl-CoA biosynthetic process from pyruvate // peptidyl-histidine phosphorylation // carbohydrate metabolic process // glucose metabolic process // signal transduction // regulation of acetyl-CoA biosynthetic process from pyruvate // peptidyl-histidine phosphorylation // regulation of acetyl-CoA …	inferred from electronic annotation // inferred from electronic annotation // inferred from electronic annotation // not recorded // inferred from electronic annotation // inferred from electronic annotation // inferred from electronic annotation // inferred from electronic annotation // not recorded // inferred from electronic annotation // --- // --- // --- // --- // --- // --- // inferred from…	GO:0005739 // GO:0005743 // GO:0005759 // GO:0005739 // GO:0005743 // GO:0005759 // GO:0005739 // GO:0005759 // GO:0005743 // GO:0005739 // GO:0005743 // GO:0005759	mitochondrion // mitochondrial inner membrane // mitochondrial matrix // mitochondrion // mitochondrial inner membrane // mitochondrial matrix // mitochondrion // mitochondrial matrix // mitochondrial inner membrane // mitochondrion // mitochondrial inner membrane // mitochondrial matrix	inferred from electronic annotation // inferred from electronic annotation // inferred from electronic annotation // inferred from electronic annotation // inferred from electronic annotation // inferred from electronic annotation // --- // --- // --- // inferred from electronic annotation // inferred from electronic annotation // inferred from electronic annotation	GO:0000155 // GO:0000166 // GO:0004672 // GO:0004740 // GO:0005524 // GO:0016740 // GO:0000155 // GO:0000166 // GO:0004672 // GO:0004740 // GO:0005524 // GO:0016740 // GO:0005524 // GO:0004672 // GO:0016740 // GO:0000155 // GO:0000166 // GO:0004740 // GO:0004673 // GO:0000155 // GO:0000166 // GO:0004672 // GO:0004740 // GO:0005524 // GO:0016740	two-component sensor activity // nucleotide binding // protein kinase activity // pyruvate dehydrogenase (acetyl-transferring) kinase activity // ATP binding // transferase activity // two-component sensor activity // nucleotide binding // protein kinase activity // pyruvate dehydrogenase (acetyl-transferring) kinase activity // ATP binding // transferase activity // ATP binding // protein kinase…	inferred from electronic annotation // inferred from electronic annotation // inferred from direct assay // inferred from electronic annotation // inferred from direct assay // inferred from electronic annotation // inferred from electronic annotation // inferred from electronic annotation // inferred from direct assay // inferred from electronic annotation // inferred from direct assay // inferr…	GenMAPP	Krebs-TCA_Cycle	---	---	---	main					6.85422	6.90346	6.99266	5.15337	5.1558	5.51685
16711562	SFMBT2	Scm-like with four mbt domains 2	coding	1.9E-6	2.06E-4	6.17	19.4	3.125	up	NM_001029880	RefSeq	Homo sapiens Scm-like with four mbt domains 2 (SFMBT2), mRNA.	chr10	-	7200586	7453450	GO:0045449 // GO:0045449 // GO:0045449 // GO:0045449 // GO:0045449 // GO:0045449 // GO:0045449 // GO:0045449 // GO:0045449 // GO:0045449 // GO:0045449 // GO:0045449	regulation of transcription // regulation of transcription // regulation of transcription // regulation of transcription // regulation of transcription // regulation of transcription // regulation of transcription // regulation of transcription // regulation of transcription // regulation of transcription // regulation of transcription // regulation of transcription	inferred from electronic annotation // inferred from electronic annotation // --- // inferred from electronic annotation // --- // inferred from electronic annotation // inferred from electronic annotation // --- // inferred from electronic annotation // --- // inferred from electronic annotation // ---	GO:0005634 // GO:0005634 // GO:0005634 // GO:0005634 // GO:0005634 // GO:0005634 // GO:0005634 // GO:0005634 // GO:0005634 // GO:0005634 // GO:0005634 // GO:0005634	nucleus // nucleus // nucleus // nucleus // nucleus // nucleus // nucleus // nucleus // nucleus // nucleus // nucleus // nucleus	inferred from electronic annotation // inferred from electronic annotation // --- // inferred from electronic annotation // --- // inferred from electronic annotation // inferred from electronic annotation // --- // inferred from electronic annotation // --- // inferred from electronic annotation // ---	GO:0043565 // GO:0043565	sequence-specific DNA binding // sequence-specific DNA binding	--- // ---	---	---	---	---	---	main					4.30328	4.50432	4.0336	2.91593	2.37174	2.54693
16998810	STARD4	StAR-related lipid transfer (START) domain containing 4	coding	4.8E-6	3.91E-4	7.4	22.82	3.125	up	NM_139164	RefSeq	Homo sapiens StAR-related lipid transfer (START) domain containing 4 (STARD4), mRNA.	chr5	-	110831731	110848288	GO:0006869 // GO:0006869 // GO:0006869 // GO:0006869 // GO:0006869 // GO:0006869 // GO:0006869	lipid transport // lipid transport // lipid transport // lipid transport // lipid transport // lipid transport // lipid transport	inferred from electronic annotation // inferred from electronic annotation // --- // inferred from electronic annotation // inferred from electronic annotation // inferred from electronic annotation // inferred from electronic annotation	---	---	---	GO:0008289 // GO:0008289 // GO:0008289 // GO:0008289 // GO:0008289 // GO:0008289 // GO:0008289	lipid binding // lipid binding // lipid binding // lipid binding // lipid binding // lipid binding // lipid binding	inferred from electronic annotation // inferred from electronic annotation // --- // inferred from electronic annotation // inferred from electronic annotation // inferred from electronic annotation // inferred from electronic annotation	---	---	---	---	---	main				ENST00000500779	4.21526	4.44513	4.88373	2.73782	2.72328	3.15423
16709553	ATRNL1	attractin-like 1	coding	5.4E-6	4.14E-4	20.64	62.31	3.0303	up	NM_207303	RefSeq	Homo sapiens attractin-like 1 (ATRNL1), mRNA.	chr10	+	116853124	117708503	GO:0007186 // GO:0007186 // GO:0007186 // GO:0007154 // GO:0007275 // GO:0007186 // GO:0007186 // GO:0007186 // GO:0007186 // GO:0007186 // GO:0007186 // GO:0007186 // GO:0007186 // GO:0007275 // GO:0007186 // GO:0007186 // GO:0007186 // GO:0007186 // GO:0007186 // GO:0007154	G-protein coupled receptor protein signaling pathway // G-protein coupled receptor protein signaling pathway // G-protein coupled receptor protein signaling pathway // cell communication // multicellular organismal development // G-protein coupled receptor protein signaling pathway // G-protein coupled receptor protein signaling pathway // G-protein coupled receptor protein signaling pathway // G…	inferred from electronic annotation // inferred from electronic annotation // --- // --- // --- // inferred from electronic annotation // inferred from electronic annotation // inferred from electronic annotation // inferred from electronic annotation // inferred from electronic annotation // inferred from electronic annotation // inferred from electronic annotation // inferred from electronic an…	GO:0016020 // GO:0016021 // GO:0016020 // GO:0016021 // GO:0016021 // GO:0016020 // GO:0016020 // GO:0016021 // GO:0016020 // GO:0016021 // GO:0016020 // GO:0016021 // GO:0016020 // GO:0016021 // GO:0016020 // GO:0016021 // GO:0016020 // GO:0016021 // GO:0016020 // GO:0016021 // GO:0016020 // GO:0016021 // GO:0016020 // GO:0016020 // GO:0016021 // GO:0016020 // GO:0016021 // GO:0016020 // GO:0016…	membrane // integral to membrane // membrane // integral to membrane // integral to membrane // membrane // membrane // integral to membrane // membrane // integral to membrane // membrane // integral to membrane // membrane // integral to membrane // membrane // integral to membrane // membrane // integral to membrane // membrane // integral to membrane // membrane // integral to membrane // mem…	inferred from electronic annotation // inferred from electronic annotation // inferred from electronic annotation // inferred from electronic annotation // --- // --- // inferred from electronic annotation // inferred from electronic annotation // inferred from electronic annotation // inferred from electronic annotation // inferred from electronic annotation // inferred from electronic annotatio…	GO:0005515 // GO:0005529 // GO:0005515 // GO:0005529 // GO:0005529 // GO:0005515 // GO:0005488 // GO:0004872 // GO:0005515 // GO:0005529 // GO:0005515 // GO:0005529 // GO:0005515 // GO:0005529 // GO:0005515 // GO:0005529 // GO:0005515 // GO:0005529 // GO:0005515 // GO:0005529 // GO:0005515 // GO:0005529 // GO:0005515 // GO:0005529 // GO:0004872 // GO:0005515 // GO:0005529 // GO:0005515 // GO:0005…	protein binding // sugar binding // protein binding // sugar binding // sugar binding // protein binding // binding // receptor activity // protein binding // sugar binding // protein binding // sugar binding // protein binding // sugar binding // protein binding // sugar binding // protein binding // sugar binding // protein binding // sugar binding // protein binding // sugar binding // protein…	inferred from electronic annotation // inferred from electronic annotation // inferred from electronic annotation // inferred from electronic annotation // --- // --- // --- // --- // inferred from electronic annotation // inferred from electronic annotation // inferred from electronic annotation // inferred from electronic annotation // inferred from electronic annotation // inferred from electr…	---	---	---	---	---	main					5.80869	5.95659	6.12734	4.38619	3.95473	4.71586
16742124	CHRDL2	chordin-like 2	coding	2.0E-6	2.13E-4	34.77	104.03	3.0303	up	NM_015424	RefSeq	Homo sapiens chordin-like 2 (CHRDL2), mRNA.	chr11	-	74407474	74442430	GO:0001503 // GO:0007275 // GO:0030154 // GO:0051216 // GO:0001503 // GO:0007275 // GO:0030154 // GO:0051216 // GO:0030154 // GO:0030514 // GO:0001503 // GO:0007275 // GO:0030154 // GO:0051216 // GO:0001503 // GO:0007275 // GO:0030154 // GO:0051216 // GO:0001503 // GO:0007275 // GO:0030154 // GO:0051216 // GO:0001503 // GO:0007275 // GO:0030154 // GO:0051216 // GO:0001503 // GO:0007275 // GO:0030…	ossification // multicellular organismal development // cell differentiation // cartilage development // ossification // multicellular organismal development // cell differentiation // cartilage development // cell differentiation // negative regulation of BMP signaling pathway // ossification // multicellular organismal development // cell differentiation // cartilage development // ossification…	inferred from electronic annotation // inferred from electronic annotation // inferred from electronic annotation // inferred from electronic annotation // inferred from electronic annotation // inferred from electronic annotation // inferred from electronic annotation // inferred from electronic annotation // --- // --- // inferred from electronic annotation // inferred from electronic annotatio…	GO:0005576 // GO:0005737 // GO:0005739 // GO:0005576 // GO:0005737 // GO:0005739 // GO:0005576 // GO:0005737 // GO:0005739 // GO:0005576 // GO:0005737 // GO:0005739 // GO:0005576 // GO:0005737 // GO:0005739 // GO:0005576 // GO:0005737 // GO:0005739 // GO:0005576 // GO:0005737 // GO:0005739 // GO:0005576 // GO:0005737 // GO:0005739 // GO:0005576 // GO:0005737 // GO:0005739 // GO:0005576 // GO:0005…	extracellular region // cytoplasm // mitochondrion // extracellular region // cytoplasm // mitochondrion // extracellular region // cytoplasm // mitochondrion // extracellular region // cytoplasm // mitochondrion // extracellular region // cytoplasm // mitochondrion // extracellular region // cytoplasm // mitochondrion // extracellular region // cytoplasm // mitochondrion // extracellular region …	inferred from electronic annotation // inferred from electronic annotation // inferred from direct assay // inferred from electronic annotation // inferred from electronic annotation // inferred from direct assay // inferred from electronic annotation // inferred from electronic annotation // inferred from direct assay // inferred from electronic annotation // inferred from electronic annotation …	GO:0005515	protein binding	---	---	---	---	---	---	main		ENST00000390975			6.56227	7.03623	6.51212	4.90618	5.21278	5.19537
17075168	CSGALNACT1	chondroitin sulfate N-acetylgalactosaminyltransferase 1	coding	1.0E-6	1.27E-4	16.97	51.86	3.0303	up	NM_001130518	RefSeq	Homo sapiens chondroitin sulfate N-acetylgalactosaminyltransferase 1 (CSGALNACT1), transcript variant 1, mRNA.	chr8	-	19261672	19615540	GO:0007399 // GO:0008037 // GO:0008283 // GO:0009653 // GO:0015014 // GO:0019276 // GO:0030166 // GO:0030198 // GO:0030206 // GO:0030210 // GO:0046398 // GO:0050650 // GO:0050651 // GO:0050653 // GO:0007399 // GO:0008037 // GO:0008283 // GO:0009653 // GO:0015014 // GO:0019276 // GO:0030166 // GO:0030198 // GO:0030206 // GO:0030210 // GO:0046398 // GO:0050650 // GO:0050651 // GO:0050653 // GO:0007…	nervous system development // cell recognition // cell proliferation // anatomical structure morphogenesis // heparan sulfate proteoglycan biosynthetic process, polysaccharide chain biosynthetic process // UDP-N-acetylgalactosamine metabolic process // proteoglycan biosynthetic process // extracellular matrix organization // chondroitin sulfate biosynthetic process // heparin biosynthetic process…	non-traceable author statement // non-traceable author statement // non-traceable author statement // non-traceable author statement // non-traceable author statement // inferred from direct assay // inferred from sequence or structural similarity // non-traceable author statement // inferred from direct assay // non-traceable author statement // inferred from direct assay // inferred from sequen…	GO:0005622 // GO:0005625 // GO:0005794 // GO:0016020 // GO:0016021 // GO:0030173 // GO:0032580 // GO:0005622 // GO:0005625 // GO:0005794 // GO:0016020 // GO:0016021 // GO:0030173 // GO:0032580 // GO:0005622 // GO:0005625 // GO:0005794 // GO:0016020 // GO:0016021 // GO:0030173 // GO:0032580 // GO:0005622 // GO:0005625 // GO:0005794 // GO:0016020 // GO:0016021 // GO:0030173 // GO:0032580 // GO:0030…	intracellular // soluble fraction // Golgi apparatus // membrane // integral to membrane // integral to Golgi membrane // Golgi cisterna membrane // intracellular // soluble fraction // Golgi apparatus // membrane // integral to membrane // integral to Golgi membrane // Golgi cisterna membrane // intracellular // soluble fraction // Golgi apparatus // membrane // integral to membrane // integral …	inferred by curator // inferred from direct assay // inferred from electronic annotation // inferred from electronic annotation // inferred from electronic annotation // non-traceable author statement // inferred from electronic annotation // inferred by curator // inferred from direct assay // inferred from electronic annotation // inferred from electronic annotation // inferred from electronic …	GO:0008376 // GO:0008376 // GO:0008955 // GO:0015020 // GO:0016740 // GO:0046872 // GO:0047237 // GO:0047238 // GO:0008376 // GO:0008376 // GO:0008955 // GO:0015020 // GO:0016740 // GO:0046872 // GO:0047237 // GO:0047238 // GO:0008376 // GO:0008376 // GO:0008955 // GO:0015020 // GO:0016740 // GO:0046872 // GO:0047237 // GO:0047238 // GO:0008376 // GO:0008376 // GO:0008955 // GO:0015020 // GO:0016…	acetylgalactosaminyltransferase activity // acetylgalactosaminyltransferase activity // peptidoglycan glycosyltransferase activity // glucuronosyltransferase activity // transferase activity // metal ion binding // glucuronylgalactosylproteoglycan 4-beta-N-acetylgalactosaminyltransferase activity // glucuronosyl-N-acetylgalactosaminyl-proteoglycan 4-beta-N-acetylgalactosaminyltransferase activity…	inferred from direct assay // inferred from sequence or structural similarity // inferred from direct assay // inferred from direct assay // inferred from electronic annotation // non-traceable author statement // inferred from direct assay // inferred from direct assay // inferred from direct assay // inferred from sequence or structural similarity // inferred from direct assay // inferred from …	---	---	---	---	---	main				ENST00000519803	5.63557	5.95974	5.50253	4.16483	3.84298	4.20148
16819264	MT1X	metallothionein 1X	coding	5.0E-7	7.89E-5	113.29	343.29	3.0303	up	NM_005952	RefSeq	Homo sapiens metallothionein 1X (MT1X), mRNA.	chr16	+	56716336	56718108	GO:0010038 // GO:0010038 // GO:0010038 // GO:0010038 // GO:0010038 // GO:0010038	response to metal ion // response to metal ion // response to metal ion // response to metal ion // response to metal ion // response to metal ion	traceable author statement // traceable author statement // --- // traceable author statement // traceable author statement // traceable author statement	---	---	---	GO:0046872 // GO:0046872 // GO:0046872 // GO:0046872 // GO:0046872 // GO:0046872 // GO:0004872 // GO:0046872	metal ion binding // metal ion binding // metal ion binding // metal ion binding // metal ion binding // metal ion binding // receptor activity // metal ion binding	inferred from electronic annotation // inferred from electronic annotation // --- // inferred from electronic annotation // inferred from electronic annotation // inferred from electronic annotation // --- // ---	---	---	---	---	---	main	NR_003669 4683bp;				8.37616	8.41482	8.48698	6.63374	6.68618	7.10726
16906991	RFTN2	raftlin family member 2	coding	2.0E-7	3.88E-5	71.22	214.65	3.0303	up	NM_144629	RefSeq	Homo sapiens raftlin family member 2 (RFTN2), mRNA.	chr2	-	198435524	198540769	---	---	---	GO:0005886 // GO:0005886 // GO:0005886 // GO:0005886	plasma membrane // plasma membrane // plasma membrane // plasma membrane	inferred from electronic annotation // inferred from electronic annotation // --- // inferred from electronic annotation	---	---	---	---	---	---	---	---	main					7.56481	7.80549	7.87547	6.06774	6.04815	6.30188
17097661	TNC	tenascin C	coding	< 1e-07	< 1e-07	113.11	341.58	3.0303	up	NM_002160	RefSeq	Homo sapiens tenascin C (TNC), mRNA.	chr9	-	117781854	117880536	GO:0007155 // GO:0007165 // GO:0007528 // GO:0009611 // GO:0060739 // GO:0060740 // GO:0007155 // GO:0007165 // GO:0007528 // GO:0009611 // GO:0060739 // GO:0060740 // GO:0007528 // GO:0060740 // GO:0007155 // GO:0007165 // GO:0060739 // GO:0009611 // GO:0008284 // GO:0010628 // GO:0007155 // GO:0007165 // GO:0007528 // GO:0009611 // GO:0060739 // GO:0060740 // GO:0007155 // GO:0007165 // GO:0007…	cell adhesion // signal transduction // neuromuscular junction development // response to wounding // mesenchymal-epithelial cell signaling involved in prostate gland development // prostate gland epithelium morphogenesis // cell adhesion // signal transduction // neuromuscular junction development // response to wounding // mesenchymal-epithelial cell signaling involved in prostate gland develop…	inferred from electronic annotation // inferred from electronic annotation // inferred from electronic annotation // inferred from expression pattern // inferred from electronic annotation // inferred from electronic annotation // inferred from electronic annotation // inferred from electronic annotation // inferred from electronic annotation // inferred from expression pattern // inferred from e…	GO:0005576 // GO:0005604 // GO:0005615 // GO:0031012 // GO:0005576 // GO:0005604 // GO:0005615 // GO:0031012 // GO:0031012 // GO:0005615 // GO:0005576 // GO:0005604 // GO:0005576 // GO:0005604 // GO:0005615 // GO:0031012 // GO:0005576 // GO:0005604 // GO:0005615 // GO:0031012 // GO:0031012 // GO:0005576 // GO:0005604 // GO:0005615 // GO:0005576 // GO:0005604 // GO:0005615 // GO:0031012 // GO:0005…	extracellular region // basement membrane // extracellular space // extracellular matrix // extracellular region // basement membrane // extracellular space // extracellular matrix // extracellular matrix // extracellular space // extracellular region // basement membrane // extracellular region // basement membrane // extracellular space // extracellular matrix // extracellular region // basemen…	not recorded // inferred from electronic annotation // inferred from direct assay // inferred from direct assay // not recorded // inferred from electronic annotation // inferred from direct assay // inferred from direct assay // --- // --- // --- // --- // not recorded // inferred from electronic annotation // inferred from direct assay // inferred from direct assay // not recorded // inferred f…	GO:0005102 // GO:0005488 // GO:0045545 // GO:0005102 // GO:0005488 // GO:0045545 // GO:0005488 // GO:0005102 // GO:0045545 // GO:0005102 // GO:0005488 // GO:0045545 // GO:0005102 // GO:0005488 // GO:0045545 // GO:0005488 // GO:0045545 // GO:0005102 // GO:0005102 // GO:0005488 // GO:0045545 // GO:0005102 // GO:0005102 // GO:0005488 // GO:0045545 // GO:0005488 // GO:0045545 // GO:0005102 // GO:0005…	receptor binding // binding // syndecan binding // receptor binding // binding // syndecan binding // binding // receptor binding // syndecan binding // receptor binding // binding // syndecan binding // receptor binding // binding // syndecan binding // binding // syndecan binding // receptor binding // receptor binding // binding // syndecan binding // receptor binding // receptor binding // bi…	inferred from electronic annotation // traceable author statement // inferred from physical interaction // inferred from electronic annotation // traceable author statement // inferred from physical interaction // --- // --- // --- // inferred from electronic annotation // traceable author statement // inferred from physical interaction // inferred from electronic annotation // traceable author s…	---	---	---	---	---	main	TCONS_00015874-XLOC_007834 1282bp;				8.36822	8.42941	8.4588	6.83917	6.74744	6.8334
17022929	COL10A1	collagen, type X, alpha 1	coding	2.5E-6	2.43E-4	4.15	12.21	2.94118	up	NM_000493	RefSeq	Homo sapiens collagen, type X, alpha 1 (COL10A1), mRNA.	chr6	-	116440085	116479910	GO:0001501 // GO:0001501 // GO:0001501 // GO:0001501 // GO:0001501 // GO:0001501 // GO:0001501 // GO:0001501	skeletal system development // skeletal system development // skeletal system development // skeletal system development // skeletal system development // skeletal system development // skeletal system development // skeletal system development	traceable author statement // traceable author statement // --- // traceable author statement // --- // traceable author statement // traceable author statement // traceable author statement	GO:0005576 // GO:0005581 // GO:0005938 // GO:0005576 // GO:0005581 // GO:0005938 // GO:0005581 // GO:0005576 // GO:0005938 // GO:0005576 // GO:0005581 // GO:0005938 // GO:0005581 // GO:0005576 // GO:0005938 // GO:0005578 // GO:0005576 // GO:0005581 // GO:0005938 // GO:0005576 // GO:0005581 // GO:0005938 // GO:0005576 // GO:0005581 // GO:0005938	extracellular region // collagen // cell cortex // extracellular region // collagen // cell cortex // collagen // extracellular region // cell cortex // extracellular region // collagen // cell cortex // collagen // extracellular region // cell cortex // proteinaceous extracellular matrix // extracellular region // collagen // cell cortex // extracellular region // collagen // cell cortex // extr…	inferred from electronic annotation // traceable author statement // inferred from electronic annotation // inferred from electronic annotation // traceable author statement // inferred from electronic annotation // --- // --- // --- // inferred from electronic annotation // traceable author statement // inferred from electronic annotation // --- // --- // --- // --- // inferred from electronic a…	GO:0046872 // GO:0046872 // GO:0046872 // GO:0046872 // GO:0046872 // GO:0046872 // GO:0046872 // GO:0046872	metal ion binding // metal ion binding // metal ion binding // metal ion binding // metal ion binding // metal ion binding // metal ion binding // metal ion binding	inferred from electronic annotation // inferred from electronic annotation // --- // inferred from electronic annotation // --- // inferred from electronic annotation // inferred from electronic annotation // inferred from electronic annotation	---	---	---	---	---	main				ENST00000430695	3.35822	3.57496	3.90644	2.09494	2.23252	1.79227
16835672	ITGA3	integrin, alpha 3 (antigen CD49C, alpha 3 subunit of VLA-3 receptor)	coding	1.0E-7	2.22E-5	81.15	240.08	2.94118	up	NM_002204	RefSeq	Homo sapiens integrin, alpha 3 (antigen CD49C, alpha 3 subunit of VLA-3 receptor) (ITGA3), transcript variant a, mRNA.	chr17	+	48133332	48167849	GO:0001764 // GO:0007155 // GO:0007160 // GO:0007229 // GO:0007613 // GO:0001764 // GO:0007155 // GO:0007160 // GO:0007229 // GO:0007613 // GO:0001764 // GO:0007155 // GO:0007160 // GO:0007229 // GO:0007613 // GO:0007229 // GO:0007155 // GO:0001764 // GO:0007160 // GO:0007613 // GO:0001764 // GO:0007155 // GO:0007160 // GO:0007229 // GO:0007613 // GO:0007160 // GO:0007613 // GO:0007229 // GO:0007…	neuron migration // cell adhesion // cell-matrix adhesion // integrin-mediated signaling pathway // memory // neuron migration // cell adhesion // cell-matrix adhesion // integrin-mediated signaling pathway // memory // neuron migration // cell adhesion // cell-matrix adhesion // integrin-mediated signaling pathway // memory // integrin-mediated signaling pathway // cell adhesion // neuron migrat…	inferred from electronic annotation // inferred from electronic annotation // traceable author statement // inferred from electronic annotation // inferred from electronic annotation // inferred from electronic annotation // inferred from electronic annotation // traceable author statement // inferred from electronic annotation // inferred from electronic annotation // inferred from electronic an…	GO:0005886 // GO:0008305 // GO:0016021 // GO:0016323 // GO:0019717 // GO:0005886 // GO:0008305 // GO:0016021 // GO:0016323 // GO:0019717 // GO:0005886 // GO:0008305 // GO:0016021 // GO:0016323 // GO:0019717 // GO:0019717 // GO:0016323 // GO:0016021 // GO:0005886 // GO:0008305 // GO:0005886 // GO:0008305 // GO:0016021 // GO:0016323 // GO:0019717 // GO:0016323 // GO:0005886 // GO:0019717 // GO:0016…	plasma membrane // integrin complex // integral to membrane // basolateral plasma membrane // synaptosome // plasma membrane // integrin complex // integral to membrane // basolateral plasma membrane // synaptosome // plasma membrane // integrin complex // integral to membrane // basolateral plasma membrane // synaptosome // synaptosome // basolateral plasma membrane // integral to membrane // pl…	not recorded // inferred from electronic annotation // inferred from electronic annotation // inferred from electronic annotation // inferred from electronic annotation // not recorded // inferred from electronic annotation // inferred from electronic annotation // inferred from electronic annotation // inferred from electronic annotation // not recorded // inferred from electronic annotation // …	GO:0004872 // GO:0005515 // GO:0004872 // GO:0005515 // GO:0004872 // GO:0005515 // GO:0004872 // GO:0005515 // GO:0004872 // GO:0005515 // GO:0005515 // GO:0004872 // GO:0004872 // GO:0005515 // GO:0004872 // GO:0005515 // GO:0004872 // GO:0005515	receptor activity // protein binding // receptor activity // protein binding // receptor activity // protein binding // receptor activity // protein binding // receptor activity // protein binding // protein binding // receptor activity // receptor activity // protein binding // receptor activity // protein binding // receptor activity // protein binding	inferred from electronic annotation // inferred from physical interaction // inferred from electronic annotation // inferred from physical interaction // inferred from electronic annotation // inferred from physical interaction // --- // --- // inferred from electronic annotation // inferred from physical interaction // --- // --- // inferred from electronic annotation // inferred from physical i…	GenMAPP // GenMAPP // GenMAPP	Integrin-mediated_cell_adhesion_KEGG // Integrin-mediated_cell_adhesion_KEGG // Integrin-mediated_cell_adhesion_KEGG	---	---	---	main					7.77439	7.90538	8.05053	6.4069	6.24184	6.33436
17095870	OGN	osteoglycin	coding	1.5E-6	1.73E-4	35.64	106.22	2.94118	up	NM_033014	RefSeq	Homo sapiens osteoglycin (OGN), transcript variant 1, mRNA.	chr9	-	95146249	95166978	GO:0008150 // GO:0008150 // GO:0008150 // GO:0008150 // GO:0008150 // GO:0008150 // GO:0008150 // GO:0008150	biological_process // biological_process // biological_process // biological_process // biological_process // biological_process // biological_process // biological_process	no biological data available // no biological data available // no biological data available // --- // no biological data available // --- // no biological data available // no biological data available	GO:0005576 // GO:0005578 // GO:0005615 // GO:0031012 // GO:0005576 // GO:0005578 // GO:0005615 // GO:0031012 // GO:0005576 // GO:0005578 // GO:0005615 // GO:0031012 // GO:0005578 // GO:0005576 // GO:0005615 // GO:0031012 // GO:0005576 // GO:0005578 // GO:0005615 // GO:0031012 // GO:0005578 // GO:0005576 // GO:0005615 // GO:0031012 // GO:0005576 // GO:0005578 // GO:0005615 // GO:0031012 // GO:0005…	extracellular region // proteinaceous extracellular matrix // extracellular space // extracellular matrix // extracellular region // proteinaceous extracellular matrix // extracellular space // extracellular matrix // extracellular region // proteinaceous extracellular matrix // extracellular space // extracellular matrix // proteinaceous extracellular matrix // extracellular region // extracellu…	inferred from electronic annotation // inferred from electronic annotation // inferred from direct assay // inferred from direct assay // inferred from electronic annotation // inferred from electronic annotation // inferred from direct assay // inferred from direct assay // inferred from electronic annotation // inferred from electronic annotation // inferred from direct assay // inferred from d…	GO:0003674 // GO:0005515 // GO:0008083 // GO:0003674 // GO:0005515 // GO:0008083 // GO:0003674 // GO:0005515 // GO:0008083 // GO:0003674 // GO:0008083 // GO:0005515 // GO:0003674 // GO:0005515 // GO:0008083 // GO:0003674 // GO:0008083 // GO:0005515 // GO:0003674 // GO:0005515 // GO:0008083 // GO:0003674 // GO:0005515 // GO:0008083 // GO:0005515	molecular_function // protein binding // growth factor activity // molecular_function // protein binding // growth factor activity // molecular_function // protein binding // growth factor activity // molecular_function // growth factor activity // protein binding // molecular_function // protein binding // growth factor activity // molecular_function // growth factor activity // protein binding …	no biological data available // inferred from physical interaction // inferred from electronic annotation // no biological data available // inferred from physical interaction // inferred from electronic annotation // no biological data available // inferred from physical interaction // inferred from electronic annotation // --- // --- // --- // no biological data available // inferred from physi…	---	---	---	---	---	main					6.60064	6.66205	6.93817	5.26623	4.82348	5.33135
16907488	RAPH1	Ras association (RalGDS/AF-6) and pleckstrin homology domains 1	coding	1.0E-7	2.22E-5	94.33	281.14	2.94118	up	NM_203365	RefSeq	Homo sapiens Ras association (RalGDS/AF-6) and pleckstrin homology domains 1 (RAPH1), transcript variant 3, mRNA.	chr2	-	204259068	204400133	GO:0007160 // GO:0007165 // GO:0007160 // GO:0007165 // GO:0007160 // GO:0007165 // GO:0007165 // GO:0007160 // GO:0007165 // GO:0007160 // GO:0007165 // GO:0007160 // GO:0007165 // GO:0007160 // GO:0007165 // GO:0007160 // GO:0007165 // GO:0007160 // GO:0007165 // GO:0007160 // GO:0007165 // GO:0007165 // GO:0007160 // GO:0007165 // GO:0007165 // GO:0007160 // GO:0007165 // GO:0007165 // GO:0007…	cell-matrix adhesion // signal transduction // cell-matrix adhesion // signal transduction // cell-matrix adhesion // signal transduction // signal transduction // cell-matrix adhesion // signal transduction // cell-matrix adhesion // signal transduction // cell-matrix adhesion // signal transduction // cell-matrix adhesion // signal transduction // cell-matrix adhesion // signal transduction // …	inferred from electronic annotation // inferred from electronic annotation // inferred from electronic annotation // inferred from electronic annotation // inferred from electronic annotation // inferred from electronic annotation // --- // inferred from electronic annotation // inferred from electronic annotation // --- // --- // inferred from electronic annotation // inferred from electronic an…	GO:0005737 // GO:0005856 // GO:0005886 // GO:0030027 // GO:0030175 // GO:0005737 // GO:0005856 // GO:0005886 // GO:0030027 // GO:0030175 // GO:0005737 // GO:0005856 // GO:0005886 // GO:0030027 // GO:0030175 // GO:0005737 // GO:0005856 // GO:0005886 // GO:0030027 // GO:0030175 // GO:0005886 // GO:0005737 // GO:0030175 // GO:0005856 // GO:0030027 // GO:0005737 // GO:0005856 // GO:0005886 // GO:0030…	cytoplasm // cytoskeleton // plasma membrane // lamellipodium // filopodium // cytoplasm // cytoskeleton // plasma membrane // lamellipodium // filopodium // cytoplasm // cytoskeleton // plasma membrane // lamellipodium // filopodium // cytoplasm // cytoskeleton // plasma membrane // lamellipodium // filopodium // plasma membrane // cytoplasm // filopodium // cytoskeleton // lamellipodium // cyto…	inferred from electronic annotation // inferred from electronic annotation // inferred from electronic annotation // inferred from electronic annotation // inferred from electronic annotation // inferred from electronic annotation // inferred from electronic annotation // inferred from electronic annotation // inferred from electronic annotation // inferred from electronic annotation // inferred …	---	---	---	---	---	Pfam	IPR001849	Pleckstrin-like	main					8.03733	8.08851	8.28782	6.53326	6.42516	6.67569
16855761	CDH19	cadherin 19, type 2	coding	1.1E-6	1.36E-4	3.1	8.79	2.85714	up	NM_021153	RefSeq	Homo sapiens cadherin 19, type 2 (CDH19), mRNA.	chr18	-	64168320	64271409	GO:0007156 // GO:0016337 // GO:0007156 // GO:0016337 // GO:0007156 // GO:0016337 // GO:0007156 // GO:0016337	homophilic cell adhesion // cell-cell adhesion // homophilic cell adhesion // cell-cell adhesion // homophilic cell adhesion // cell-cell adhesion // homophilic cell adhesion // cell-cell adhesion	non-traceable author statement // non-traceable author statement // non-traceable author statement // non-traceable author statement // --- // --- // non-traceable author statement // non-traceable author statement	GO:0005886 // GO:0016021 // GO:0005886 // GO:0016021 // GO:0005886 // GO:0016021 // GO:0016020 // GO:0005886 // GO:0016021	plasma membrane // integral to membrane // plasma membrane // integral to membrane // plasma membrane // integral to membrane // membrane // plasma membrane // integral to membrane	inferred from electronic annotation // non-traceable author statement // inferred from electronic annotation // non-traceable author statement // --- // --- // --- // inferred from electronic annotation // non-traceable author statement	GO:0005509 // GO:0005509 // GO:0005509 // GO:0005509	calcium ion binding // calcium ion binding // calcium ion binding // calcium ion binding	inferred from electronic annotation // inferred from electronic annotation // --- // inferred from electronic annotation	---	---	---	---	---	main					3.37501	3.02865	3.01149	1.69353	1.749	1.40744
17118451	CYorf15A	chromosome Y open reading frame 15A	coding	1.1E-6	1.36E-4	3.96	11.25	2.85714	up	NM_001005852	RefSeq	Homo sapiens chromosome Y open reading frame 15A (CYorf15A), mRNA.	chrY	+	21729235	21769056	---	---	---	---	---	---	---	---	---	---	---	---	---	---	main					3.40207	3.4859	3.59569	1.68834	2.03551	2.19097
17075973	DUSP4	dual specificity phosphatase 4	coding	8.63E-5	0.003	6.2	17.59	2.85714	up	NM_057158	RefSeq	Homo sapiens dual specificity phosphatase 4 (DUSP4), transcript variant 2, mRNA.	chr8	-	29190579	29208267	GO:0000165 // GO:0006470 // GO:0010033 // GO:0000165 // GO:0006470 // GO:0010033 // GO:0000165 // GO:0006470 // GO:0010033 // GO:0006470 // GO:0000165 // GO:0010033 // GO:0016311 // GO:0000165 // GO:0006470 // GO:0010033 // GO:0006470 // GO:0016311 // GO:0000165 // GO:0006470 // GO:0010033	MAPKKK cascade // protein dephosphorylation // response to organic substance // MAPKKK cascade // protein dephosphorylation // response to organic substance // MAPKKK cascade // protein dephosphorylation // response to organic substance // protein amino acid dephosphorylation // MAPKKK cascade // response to organic substance // dephosphorylation // MAPKKK cascade // protein dephosphorylation // …	traceable author statement // inferred from electronic annotation // inferred from electronic annotation // traceable author statement // inferred from electronic annotation // inferred from electronic annotation // traceable author statement // inferred from electronic annotation // inferred from electronic annotation // --- // --- // --- // --- // traceable author statement // inferred from ele…	GO:0005625 // GO:0005634 // GO:0005654 // GO:0005625 // GO:0005634 // GO:0005654 // GO:0005625 // GO:0005634 // GO:0005654 // GO:0005634 // GO:0005625 // GO:0005654 // GO:0005625 // GO:0005634 // GO:0005654 // GO:0005625 // GO:0005634 // GO:0005654	soluble fraction // nucleus // nucleoplasm // soluble fraction // nucleus // nucleoplasm // soluble fraction // nucleus // nucleoplasm // nucleus // soluble fraction // nucleoplasm // soluble fraction // nucleus // nucleoplasm // soluble fraction // nucleus // nucleoplasm	inferred from electronic annotation // inferred from electronic annotation // not recorded // inferred from electronic annotation // inferred from electronic annotation // not recorded // inferred from electronic annotation // inferred from electronic annotation // not recorded // --- // --- // --- // inferred from electronic annotation // inferred from electronic annotation // not recorded // in…	GO:0004725 // GO:0008330 // GO:0016787 // GO:0017017 // GO:0004725 // GO:0008330 // GO:0016787 // GO:0017017 // GO:0004725 // GO:0008330 // GO:0016787 // GO:0017017 // GO:0004725 // GO:0008330 // GO:0016787 // GO:0017017 // GO:0008138 // GO:0016791 // GO:0004725 // GO:0008330 // GO:0016787 // GO:0017017 // GO:0008138 // GO:0016791 // GO:0004725 // GO:0004725 // GO:0008330 // GO:0016787 // GO:0017…	protein tyrosine phosphatase activity // protein tyrosine/threonine phosphatase activity // hydrolase activity // MAP kinase tyrosine/serine/threonine phosphatase activity // protein tyrosine phosphatase activity // protein tyrosine/threonine phosphatase activity // hydrolase activity // MAP kinase tyrosine/serine/threonine phosphatase activity // protein tyrosine phosphatase activity // protein …	not recorded // inferred from electronic annotation // inferred from electronic annotation // inferred from electronic annotation // not recorded // inferred from electronic annotation // inferred from electronic annotation // inferred from electronic annotation // not recorded // inferred from electronic annotation // inferred from electronic annotation // inferred from electronic annotation // …	---	---	Pfam // Pfam	IPR000242 // IPR000242	Tyrosine specific protein phosphatase // Tyrosine specific protein phosphatase	main					4.3979	3.49618	4.52311	2.77042	2.42505	2.65962
16969729	EGF	epidermal growth factor	coding	3.0E-7	5.37E-5	5.56	16.05	2.85714	up	NM_001963	RefSeq	Homo sapiens epidermal growth factor (EGF), transcript variant 1, mRNA.	chr4	+	110834040	110934118	GO:0000186 // GO:0001525 // GO:0006260 // GO:0007165 // GO:0007173 // GO:0008284 // GO:0021940 // GO:0035413 // GO:0042327 // GO:0043406 // GO:0045741 // GO:0045741 // GO:0045840 // GO:0048754 // GO:0050708 // GO:0050730 // GO:0051048 // GO:0060749 // GO:0090279 // GO:2000008 // GO:0000186 // GO:0001525 // GO:0006260 // GO:0007165 // GO:0007173 // GO:0008284 // GO:0021940 // GO:0035413 // GO:0042…	activation of MAPKK activity // angiogenesis // DNA replication // signal transduction // epidermal growth factor receptor signaling pathway // positive regulation of cell proliferation // positive regulation of granule cell precursor proliferation // positive regulation of catenin protein nuclear translocation // positive regulation of phosphorylation // positive regulation of MAP kinase activit…	inferred from electronic annotation // inferred from direct assay // traceable author statement // not recorded // inferred from electronic annotation // inferred from direct assay // inferred from electronic annotation // inferred from direct assay // inferred from direct assay // inferred from direct assay // inferred from direct assay // traceable author statement // inferred from direct assay…	GO:0005576 // GO:0005576 // GO:0005615 // GO:0005625 // GO:0005886 // GO:0016021 // GO:0005576 // GO:0005576 // GO:0005615 // GO:0005625 // GO:0005886 // GO:0016021 // GO:0005576 // GO:0005576 // GO:0005615 // GO:0005625 // GO:0005886 // GO:0016021 // GO:0005576 // GO:0005576 // GO:0005615 // GO:0005625 // GO:0005886 // GO:0016021 // GO:0005576 // GO:0016021 // GO:0031093 // GO:0005615 // GO:0005…	extracellular region // extracellular region // extracellular space // soluble fraction // plasma membrane // integral to membrane // extracellular region // extracellular region // extracellular space // soluble fraction // plasma membrane // integral to membrane // extracellular region // extracellular region // extracellular space // soluble fraction // plasma membrane // integral to membrane …	not recorded // inferred by curator // inferred from electronic annotation // inferred from electronic annotation // traceable author statement // inferred from electronic annotation // not recorded // inferred by curator // inferred from electronic annotation // inferred from electronic annotation // traceable author statement // inferred from electronic annotation // not recorded // inferred by…	GO:0005154 // GO:0005509 // GO:0005515 // GO:0008083 // GO:0030297 // GO:0005154 // GO:0005509 // GO:0005515 // GO:0008083 // GO:0030297 // GO:0005154 // GO:0005509 // GO:0005515 // GO:0008083 // GO:0030297 // GO:0005154 // GO:0005509 // GO:0005515 // GO:0008083 // GO:0030297 // GO:0008083 // GO:0030297 // GO:0005509 // GO:0005154 // GO:0005515 // GO:0005154 // GO:0005509 // GO:0005515 // GO:0008…	epidermal growth factor receptor binding // calcium ion binding // protein binding // growth factor activity // transmembrane receptor protein tyrosine kinase activator activity // epidermal growth factor receptor binding // calcium ion binding // protein binding // growth factor activity // transmembrane receptor protein tyrosine kinase activator activity // epidermal growth factor receptor bind…	traceable author statement // inferred from electronic annotation // inferred from physical interaction // inferred from direct assay // traceable author statement // traceable author statement // inferred from electronic annotation // inferred from physical interaction // inferred from direct assay // traceable author statement // traceable author statement // inferred from electronic annotation…	GenMAPP // GenMAPP // GenMAPP // GenMAPP	TGF_Beta_Signaling_Pathway // TGF_Beta_Signaling_Pathway // TGF_Beta_Signaling_Pathway // TGF_Beta_Signaling_Pathway	---	---	---	main					4.16252	4.06541	3.79469	2.40272	2.46026	2.51836
16792181	FOXA1	forkhead box A1	coding	3.76E-5	0.00162	4.22	11.99	2.85714	up	NM_004496	RefSeq	Homo sapiens forkhead box A1 (FOXA1), mRNA.	chr14	-	38059189	38069245	GO:0000122 // GO:0006338 // GO:0006355 // GO:0007389 // GO:0008634 // GO:0009790 // GO:0010551 // GO:0010552 // GO:0010552 // GO:0010817 // GO:0030324 // GO:0032355 // GO:0033148 // GO:0042445 // GO:0042593 // GO:0045666 // GO:0045931 // GO:0045944 // GO:0048665 // GO:0048754 // GO:0051090 // GO:0051091 // GO:0060441 // GO:0060487 // GO:0060528 // GO:0060738 // GO:0060740 // GO:0060741 // GO:0060…	negative regulation of transcription from RNA polymerase II promoter // chromatin remodeling // regulation of transcription, DNA-dependent // pattern specification process // negative regulation of survival gene product expression // embryo development // regulation of gene-specific transcription from RNA polymerase II promoter // positive regulation of gene-specific transcription from RNA polyme…	inferred from sequence or structural similarity // inferred from sequence or structural similarity // inferred from electronic annotation // inferred from sequence or structural similarity // inferred from direct assay // inferred from sequence or structural similarity // inferred from sequence or structural similarity // inferred from direct assay // inferred from mutant phenotype // inferred fr…	GO:0005634 // GO:0005667 // GO:0005634 // GO:0005667 // GO:0005634 // GO:0005634 // GO:0005667	nucleus // transcription factor complex // nucleus // transcription factor complex // nucleus // nucleus // transcription factor complex	inferred from direct assay // inferred from sequence or structural similarity // inferred from direct assay // inferred from sequence or structural similarity // --- // inferred from direct assay // inferred from sequence or structural similarity	GO:0003677 // GO:0003690 // GO:0003700 // GO:0003704 // GO:0003705 // GO:0008134 // GO:0008301 // GO:0010843 // GO:0010843 // GO:0016563 // GO:0016566 // GO:0019904 // GO:0003677 // GO:0003690 // GO:0003700 // GO:0003704 // GO:0003705 // GO:0008134 // GO:0008301 // GO:0010843 // GO:0010843 // GO:0016563 // GO:0016566 // GO:0019904 // GO:0003700 // GO:0010843 // GO:0003677 // GO:0043565 // GO:0003…	DNA binding // double-stranded DNA binding // sequence-specific DNA binding transcription factor activity // specific RNA polymerase II transcription factor activity // sequence-specific enhancer binding RNA polymerase II transcription factor activity // transcription factor binding // DNA bending activity // promoter binding // promoter binding // transcription activator activity // specific tra…	inferred from direct assay // inferred from sequence or structural similarity // inferred from sequence or structural similarity // inferred from sequence or structural similarity // inferred from sequence or structural similarity // inferred from sequence or structural similarity // inferred from sequence or structural similarity // inferred from direct assay // inferred from sequence or structu…	---	---	---	---	---	main		TCONS_00022712-XLOC_010998		TCONS_00022478-XLOC_010807	3.43861	3.15446	4.16782	2.11384	2.02606	2.04277
16842266	MFAP4	microfibrillar-associated protein 4	coding	1.0E-7	2.22E-5	589.72	1671.59	2.85714	up	NM_001198695	RefSeq	Homo sapiens microfibrillar-associated protein 4 (MFAP4), transcript variant 1, mRNA.	chr17	-	19286755	19290553	GO:0007155 // GO:0007165 // GO:0007155 // GO:0007165 // GO:0007155 // GO:0007165 // GO:0007155 // GO:0007165 // GO:0007155 // GO:0007165 // GO:0007155 // GO:0007165 // GO:0007165	cell adhesion // signal transduction // cell adhesion // signal transduction // cell adhesion // signal transduction // cell adhesion // signal transduction // cell adhesion // signal transduction // cell adhesion // signal transduction // signal transduction	non-traceable author statement // inferred from electronic annotation // non-traceable author statement // inferred from electronic annotation // non-traceable author statement // inferred from electronic annotation // --- // --- // non-traceable author statement // inferred from electronic annotation // non-traceable author statement // inferred from electronic annotation // ---	GO:0001527 // GO:0005576 // GO:0005578 // GO:0031012 // GO:0001527 // GO:0005576 // GO:0005578 // GO:0031012 // GO:0001527 // GO:0005576 // GO:0005578 // GO:0031012 // GO:0001527 // GO:0031012 // GO:0005576 // GO:0005578 // GO:0001527 // GO:0005576 // GO:0005578 // GO:0031012 // GO:0001527 // GO:0005576 // GO:0005578 // GO:0031012	microfibril // extracellular region // proteinaceous extracellular matrix // extracellular matrix // microfibril // extracellular region // proteinaceous extracellular matrix // extracellular matrix // microfibril // extracellular region // proteinaceous extracellular matrix // extracellular matrix // microfibril // extracellular matrix // extracellular region // proteinaceous extracellular matri…	non-traceable author statement // inferred from electronic annotation // inferred from electronic annotation // inferred from direct assay // non-traceable author statement // inferred from electronic annotation // inferred from electronic annotation // inferred from direct assay // non-traceable author statement // inferred from electronic annotation // inferred from electronic annotation // inf…	GO:0003674 // GO:0005102 // GO:0003674 // GO:0005102 // GO:0003674 // GO:0005102 // GO:0003674 // GO:0005102 // GO:0003674 // GO:0005102 // GO:0003674 // GO:0005102 // GO:0005102	molecular_function // receptor binding // molecular_function // receptor binding // molecular_function // receptor binding // molecular_function // receptor binding // molecular_function // receptor binding // molecular_function // receptor binding // receptor binding	no biological data available // inferred from electronic annotation // no biological data available // inferred from electronic annotation // no biological data available // inferred from electronic annotation // --- // --- // no biological data available // inferred from electronic annotation // no biological data available // inferred from electronic annotation // ---	---	---	---	---	---	main					10.6802	10.721	10.728	9.17067	9.11969	9.27666
16819207	MT2A	metallothionein 2A	coding	1.2E-6	1.46E-4	104.31	294.34	2.85714	up	NM_005953	RefSeq	Homo sapiens metallothionein 2A (MT2A), mRNA.	chr16	+	56642111	56643409	GO:0006878 // GO:0006878 // GO:0006878 // GO:0006878	cellular copper ion homeostasis // cellular copper ion homeostasis // cellular copper ion homeostasis // cellular copper ion homeostasis	traceable author statement // traceable author statement // --- // traceable author statement	---	---	---	GO:0005515 // GO:0046872 // GO:0005515 // GO:0046872 // GO:0046872 // GO:0005515 // GO:0005515 // GO:0046872	protein binding // metal ion binding // protein binding // metal ion binding // metal ion binding // protein binding // protein binding // metal ion binding	inferred from physical interaction // inferred from electronic annotation // inferred from physical interaction // inferred from electronic annotation // --- // --- // inferred from physical interaction // inferred from electronic annotation	---	---	---	---	---	main			NR_001447 7964bp;		8.20439	8.17849	8.22931	6.78768	6.37188	6.91017
16854437	CDH2	cadherin 2, type 1, N-cadherin (neuronal)	coding	1.0E-7	2.22E-5	54.49	150.3	2.77778	up	NM_001792	RefSeq	Homo sapiens cadherin 2, type 1, N-cadherin (neuronal) (CDH2), mRNA.	chr18	-	25530930	25757445	GO:0007155 // GO:0007156 // GO:0007157 // GO:0007416 // GO:0016339 // GO:0016477 // GO:0031641 // GO:0032880 // GO:0035023 // GO:0048514 // GO:0050770 // GO:0051291 // GO:0007155 // GO:0007156 // GO:0007157 // GO:0007416 // GO:0016339 // GO:0016477 // GO:0031641 // GO:0032880 // GO:0035023 // GO:0048514 // GO:0050770 // GO:0051291 // GO:0016339 // GO:0032880 // GO:0007156 // GO:0007157 // GO:0007…	cell adhesion // homophilic cell adhesion // heterophilic cell-cell adhesion // synapse assembly // calcium-dependent cell-cell adhesion // cell migration // regulation of myelination // regulation of protein localization // regulation of Rho protein signal transduction // blood vessel morphogenesis // regulation of axonogenesis // protein heterooligomerization // cell adhesion // homophilic cell…	traceable author statement // inferred from electronic annotation // inferred from electronic annotation // inferred from electronic annotation // inferred from electronic annotation // inferred from electronic annotation // inferred from electronic annotation // inferred from electronic annotation // inferred from electronic annotation // inferred from electronic annotation // inferred from elec…	GO:0005886 // GO:0005911 // GO:0005913 // GO:0005916 // GO:0016021 // GO:0016342 // GO:0030027 // GO:0045202 // GO:0005886 // GO:0005911 // GO:0005913 // GO:0005916 // GO:0016021 // GO:0016342 // GO:0030027 // GO:0045202 // GO:0005913 // GO:0005886 // GO:0030027 // GO:0016021 // GO:0016342 // GO:0045202 // GO:0005916 // GO:0005911 // GO:0016020 // GO:0043234 // GO:0005912 // GO:0005886 // GO:0005…	plasma membrane // cell-cell junction // cell-cell adherens junction // fascia adherens // integral to membrane // catenin complex // lamellipodium // synapse // plasma membrane // cell-cell junction // cell-cell adherens junction // fascia adherens // integral to membrane // catenin complex // lamellipodium // synapse // cell-cell adherens junction // plasma membrane // lamellipodium // integral…	not recorded // inferred from direct assay // inferred from direct assay // inferred from electronic annotation // inferred from electronic annotation // inferred from direct assay // inferred from electronic annotation // inferred from electronic annotation // not recorded // inferred from direct assay // inferred from direct assay // inferred from electronic annotation // inferred from electron…	GO:0005509 // GO:0005515 // GO:0008013 // GO:0019901 // GO:0019903 // GO:0032403 // GO:0042153 // GO:0045294 // GO:0045295 // GO:0005509 // GO:0005515 // GO:0008013 // GO:0019901 // GO:0019903 // GO:0032403 // GO:0042153 // GO:0045294 // GO:0045295 // GO:0005515 // GO:0045294 // GO:0032403 // GO:0042153 // GO:0008013 // GO:0005509 // GO:0019903 // GO:0045295 // GO:0019901 // GO:0005509 // GO:0005…	calcium ion binding // protein binding // beta-catenin binding // protein kinase binding // protein phosphatase binding // protein complex binding // RPTP-like protein binding // alpha-catenin binding // gamma-catenin binding // calcium ion binding // protein binding // beta-catenin binding // protein kinase binding // protein phosphatase binding // protein complex binding // RPTP-like protein bi…	inferred from electronic annotation // inferred from physical interaction // traceable author statement // inferred from electronic annotation // inferred from electronic annotation // inferred from electronic annotation // inferred from electronic annotation // inferred from physical interaction // inferred from physical interaction // inferred from electronic annotation // inferred from physica…	---	---	---	---	---	main					7.17531	7.26039	7.26769	5.70849	5.73395	5.81707
16807763	EHD4	EH-domain containing 4	coding	8.76E-5	0.00302	48.93	134.78	2.77778	up	NM_139265	RefSeq	Homo sapiens EH-domain containing 4 (EHD4), mRNA.	chr15	-	42190570	42264776	GO:0006907 // GO:0030100 // GO:0006907 // GO:0030100 // GO:0006907 // GO:0030100 // GO:0006907 // GO:0030100	pinocytosis // regulation of endocytosis // pinocytosis // regulation of endocytosis // pinocytosis // regulation of endocytosis // pinocytosis // regulation of endocytosis	inferred from electronic annotation // inferred from electronic annotation // inferred from electronic annotation // inferred from electronic annotation // --- // --- // inferred from electronic annotation // inferred from electronic annotation	GO:0005634 // GO:0005768 // GO:0005783 // GO:0016020 // GO:0031901 // GO:0055038 // GO:0005634 // GO:0005768 // GO:0005783 // GO:0016020 // GO:0031901 // GO:0055038 // GO:0016020 // GO:0055038 // GO:0005634 // GO:0005768 // GO:0005783 // GO:0031901 // GO:0005634 // GO:0005768 // GO:0005783 // GO:0016020 // GO:0031901 // GO:0055038	nucleus // endosome // endoplasmic reticulum // membrane // early endosome membrane // recycling endosome membrane // nucleus // endosome // endoplasmic reticulum // membrane // early endosome membrane // recycling endosome membrane // membrane // recycling endosome membrane // nucleus // endosome // endoplasmic reticulum // early endosome membrane // nucleus // endosome // endoplasmic reticulum …	traceable author statement // inferred from electronic annotation // inferred from direct assay // inferred from electronic annotation // inferred from electronic annotation // inferred from electronic annotation // traceable author statement // inferred from electronic annotation // inferred from direct assay // inferred from electronic annotation // inferred from electronic annotation // inferr…	GO:0000166 // GO:0003676 // GO:0003924 // GO:0005509 // GO:0005515 // GO:0005524 // GO:0005525 // GO:0000166 // GO:0003676 // GO:0003924 // GO:0005509 // GO:0005515 // GO:0005524 // GO:0005525 // GO:0005524 // GO:0005515 // GO:0005525 // GO:0000166 // GO:0005509 // GO:0003676 // GO:0003924 // GO:0000166 // GO:0003676 // GO:0003924 // GO:0005509 // GO:0005515 // GO:0005524 // GO:0005525	nucleotide binding // nucleic acid binding // GTPase activity // calcium ion binding // protein binding // ATP binding // GTP binding // nucleotide binding // nucleic acid binding // GTPase activity // calcium ion binding // protein binding // ATP binding // GTP binding // ATP binding // protein binding // GTP binding // nucleotide binding // calcium ion binding // nucleic acid binding // GTPase …	inferred from electronic annotation // traceable author statement // inferred from electronic annotation // inferred from electronic annotation // inferred from physical interaction // inferred from electronic annotation // inferred from electronic annotation // inferred from electronic annotation // traceable author statement // inferred from electronic annotation // inferred from electronic ann…	---	---	---	---	---	main					6.68628	7.35102	7.19431	5.87284	5.07647	5.84402
16769419	GLT8D2	glycosyltransferase 8 domain containing 2	coding	3.0E-7	5.37E-5	50.92	142.24	2.77778	up	NM_031302	RefSeq	Homo sapiens glycosyltransferase 8 domain containing 2 (GLT8D2), mRNA.	chr12	-	104382762	104457961	---	---	---	GO:0016020 // GO:0016021 // GO:0016020 // GO:0016021 // GO:0016020 // GO:0016021 // GO:0016020 // GO:0016021	membrane // integral to membrane // membrane // integral to membrane // membrane // integral to membrane // membrane // integral to membrane	inferred from electronic annotation // inferred from electronic annotation // inferred from electronic annotation // inferred from electronic annotation // --- // --- // inferred from electronic annotation // inferred from electronic annotation	GO:0016757 // GO:0016757 // GO:0016757 // GO:0016757	transferase activity, transferring glycosyl groups // transferase activity, transferring glycosyl groups // transferase activity, transferring glycosyl groups // transferase activity, transferring glycosyl groups	inferred from electronic annotation // inferred from electronic annotation // --- // inferred from electronic annotation	---	---	---	---	---	main				ENST00000355965	7.2747	6.96085	7.22925	5.7005	5.54846	5.71717
17110071	SRPX	sushi-repeat-containing protein, X-linked	coding	1.0E-7	2.22E-5	263.87	727.18	2.77778	up	NM_006307	RefSeq	Homo sapiens sushi-repeat-containing protein, X-linked (SRPX), transcript variant 1, mRNA.	chrX	-	38008588	38080696	GO:0007155 // GO:0007155 // GO:0007155 // GO:0007155 // GO:0007155 // GO:0007155 // GO:0007155 // GO:0007155 // GO:0007155	cell adhesion // cell adhesion // cell adhesion // cell adhesion // cell adhesion // cell adhesion // cell adhesion // cell adhesion // cell adhesion	inferred from electronic annotation // inferred from electronic annotation // inferred from electronic annotation // inferred from electronic annotation // inferred from electronic annotation // --- // inferred from electronic annotation // inferred from electronic annotation // inferred from electronic annotation	GO:0009986 // GO:0016020 // GO:0009986 // GO:0016020 // GO:0009986 // GO:0016020 // GO:0009986 // GO:0016020 // GO:0009986 // GO:0016020 // GO:0009986 // GO:0016020 // GO:0009986 // GO:0016020 // GO:0009986 // GO:0016020 // GO:0009986 // GO:0016020	cell surface // membrane // cell surface // membrane // cell surface // membrane // cell surface // membrane // cell surface // membrane // cell surface // membrane // cell surface // membrane // cell surface // membrane // cell surface // membrane	inferred from direct assay // traceable author statement // inferred from direct assay // traceable author statement // inferred from direct assay // traceable author statement // inferred from direct assay // traceable author statement // inferred from direct assay // traceable author statement // --- // --- // inferred from direct assay // traceable author statement // inferred from direct assa…	---	---	---	---	---	---	---	---	main					9.45144	9.48245	9.59275	8.02089	7.94275	8.12287
17116977	UTY	ubiquitously transcribed tetratricopeptide repeat gene, Y-linked	coding	1.7E-6	1.89E-4	4.33	11.92	2.77778	up	NM_007125	RefSeq	Homo sapiens ubiquitously transcribed tetratricopeptide repeat gene, Y-linked (UTY), transcript variant 3, mRNA.	chrY	-	15360259	15592553	GO:0016568 // GO:0055114 // GO:0016568 // GO:0055114 // GO:0016568 // GO:0055114 // GO:0016568 // GO:0055114 // GO:0055114 // GO:0016568 // GO:0016568 // GO:0055114 // GO:0016568 // GO:0055114 // GO:0016568 // GO:0055114 // GO:0016568 // GO:0055114 // GO:0016568 // GO:0055114	chromatin modification // oxidation reduction // chromatin modification // oxidation reduction // chromatin modification // oxidation reduction // chromatin modification // oxidation reduction // oxidation reduction // chromatin modification // chromatin modification // oxidation reduction // chromatin modification // oxidation reduction // chromatin modification // oxidation reduction // chromat…	inferred from electronic annotation // inferred from electronic annotation // inferred from electronic annotation // inferred from electronic annotation // inferred from electronic annotation // inferred from electronic annotation // inferred from electronic annotation // inferred from electronic annotation // --- // --- // inferred from electronic annotation // inferred from electronic annotatio…	GO:0005634 // GO:0005730 // GO:0005634 // GO:0005730 // GO:0005634 // GO:0005730 // GO:0005634 // GO:0005730 // GO:0005730 // GO:0005634 // GO:0005634 // GO:0005730 // GO:0005634 // GO:0005730 // GO:0005634 // GO:0005730 // GO:0005634 // GO:0005730 // GO:0005634 // GO:0005730	nucleus // nucleolus // nucleus // nucleolus // nucleus // nucleolus // nucleus // nucleolus // nucleolus // nucleus // nucleus // nucleolus // nucleus // nucleolus // nucleus // nucleolus // nucleus // nucleolus // nucleus // nucleolus	inferred from direct assay // inferred from direct assay // inferred from direct assay // inferred from direct assay // inferred from direct assay // inferred from direct assay // inferred from direct assay // inferred from direct assay // --- // --- // inferred from direct assay // inferred from direct assay // inferred from direct assay // inferred from direct assay // inferred from direct assa…	GO:0005488 // GO:0016491 // GO:0016702 // GO:0046872 // GO:0005488 // GO:0016491 // GO:0016702 // GO:0046872 // GO:0005488 // GO:0016491 // GO:0016702 // GO:0046872 // GO:0005488 // GO:0016491 // GO:0016702 // GO:0046872 // GO:0005488 // GO:0016491 // GO:0046872 // GO:0016702 // GO:0005488 // GO:0016491 // GO:0016702 // GO:0046872 // GO:0005488 // GO:0016491 // GO:0016702 // GO:0046872 // GO:0005…	binding // oxidoreductase activity // oxidoreductase activity, acting on single donors with incorporation of molecular oxygen, incorporation of two atoms of oxygen // metal ion binding // binding // oxidoreductase activity // oxidoreductase activity, acting on single donors with incorporation of molecular oxygen, incorporation of two atoms of oxygen // metal ion binding // binding // oxidoreducta…	inferred from electronic annotation // inferred from electronic annotation // inferred from electronic annotation // inferred from electronic annotation // inferred from electronic annotation // inferred from electronic annotation // inferred from electronic annotation // inferred from electronic annotation // inferred from electronic annotation // inferred from electronic annotation // inferred …	---	---	---	---	---	main					3.29433	3.84634	3.59508	2.02938	2.06763	2.19845
16704614	ANXA8	annexin A8	coding	1.65E-5	8.92E-4	19.72	53.16	2.7027	up	NM_001040084	RefSeq	Homo sapiens annexin A8 (ANXA8), mRNA.	chr10	+	48255225	48279199	GO:0007596 // GO:0007596	blood coagulation // blood coagulation	--- // ---	---	---	---	GO:0005509 // GO:0005544 // GO:0005509 // GO:0005544 // GO:0005544 // GO:0005509 // GO:0005509 // GO:0005544 // GO:0005544 // GO:0005509 // GO:0005509 // GO:0005544 // GO:0005544 // GO:0005509 // GO:0005509 // GO:0005544 // GO:0005544 // GO:0005509 // GO:0005509 // GO:0005544 // GO:0005544 // GO:0005509 // GO:0005509 // GO:0005544 // GO:0005509 // GO:0005544 // GO:0005509 // GO:0005544 // GO:0005…	calcium ion binding // calcium-dependent phospholipid binding // calcium ion binding // calcium-dependent phospholipid binding // calcium-dependent phospholipid binding // calcium ion binding // calcium ion binding // calcium-dependent phospholipid binding // calcium-dependent phospholipid binding // calcium ion binding // calcium ion binding // calcium-dependent phospholipid binding // calcium-d…	inferred from electronic annotation // inferred from electronic annotation // inferred from electronic annotation // inferred from electronic annotation // --- // --- // inferred from electronic annotation // inferred from electronic annotation // --- // --- // inferred from electronic annotation // inferred from electronic annotation // --- // --- // inferred from electronic annotation // inferr…	GenMAPP // GenMAPP // GenMAPP // GenMAPP	Prostaglandin_synthesis_regulation // Prostaglandin_synthesis_regulation // Prostaglandin_synthesis_regulation // Prostaglandin_synthesis_regulation	---	---	---	main					5.63609	5.53176	6.0373	4.39066	3.91167	4.55703
17007048	C4A	complement component 4A (Rodgers blood group)	coding	3.0E-7	5.37E-5	13.58	36.24	2.7027	up	NM_007293	RefSeq	Homo sapiens complement component 4A (Rodgers blood group) (C4A), mRNA.	chr6	+	31949801	31970458	GO:0006954 // GO:0006957 // GO:0006958 // GO:0006954 // GO:0006958 // GO:0045087 // GO:0006954 // GO:0006957 // GO:0006958 // GO:0006954 // GO:0006958 // GO:0006957 // GO:0006954 // GO:0006957 // GO:0006958 // GO:0006954 // GO:0006957 // GO:0006958 // GO:0006954 // GO:0006957 // GO:0006958 // GO:0006954 // GO:0006957 // GO:0006958 // GO:0006954 // GO:0006957 // GO:0006958 // GO:0006954 // GO:0006…	inflammatory response // complement activation, alternative pathway // complement activation, classical pathway // inflammatory response // complement activation, classical pathway // innate immune response // inflammatory response // complement activation, alternative pathway // complement activation, classical pathway // inflammatory response // complement activation, classical pathway // compl…	inferred from electronic annotation // not recorded // inferred from electronic annotation // inferred from electronic annotation // inferred from electronic annotation // inferred from electronic annotation // inferred from electronic annotation // not recorded // inferred from electronic annotation // --- // --- // --- // inferred from electronic annotation // not recorded // inferred from elec…	GO:0005576 // GO:0005615 // GO:0005576 // GO:0005615 // GO:0005576 // GO:0005615 // GO:0005576 // GO:0005615 // GO:0005576 // GO:0005615 // GO:0005576 // GO:0005615 // GO:0005576 // GO:0005615 // GO:0005576 // GO:0005615 // GO:0005576 // GO:0005615 // GO:0005576 // GO:0005615 // GO:0005576 // GO:0005615 // GO:0005576 // GO:0005615 // GO:0005576 // GO:0005615 // GO:0005576 // GO:0005615 // GO:0005…	extracellular region // extracellular space // extracellular region // extracellular space // extracellular region // extracellular space // extracellular region // extracellular space // extracellular region // extracellular space // extracellular region // extracellular space // extracellular region // extracellular space // extracellular region // extracellular space // extracellular region //…	not recorded // inferred from electronic annotation // inferred from electronic annotation // inferred from electronic annotation // not recorded // inferred from electronic annotation // --- // --- // not recorded // inferred from electronic annotation // not recorded // inferred from electronic annotation // not recorded // inferred from electronic annotation // not recorded // inferred from el…	GO:0004866 // GO:0005515 // GO:0004866 // GO:0005515 // GO:0004866 // GO:0005515 // GO:0005515 // GO:0004866 // GO:0004866 // GO:0005515 // GO:0004866 // GO:0005515 // GO:0004866 // GO:0005515 // GO:0004866 // GO:0005515 // GO:0004866 // GO:0005515 // GO:0004866 // GO:0005515 // GO:0004866 // GO:0005515 // GO:0004866 // GO:0005515 // GO:0004866 // GO:0005515 // GO:0004866 // GO:0005515 // GO:0004…	endopeptidase inhibitor activity // protein binding // endopeptidase inhibitor activity // protein binding // endopeptidase inhibitor activity // protein binding // protein binding // endopeptidase inhibitor activity // endopeptidase inhibitor activity // protein binding // endopeptidase inhibitor activity // protein binding // endopeptidase inhibitor activity // protein binding // endopeptidase …	inferred from electronic annotation // inferred from electronic annotation // inferred from electronic annotation // inferred from electronic annotation // inferred from electronic annotation // inferred from electronic annotation // --- // --- // inferred from electronic annotation // inferred from electronic annotation // inferred from electronic annotation // inferred from electronic annotatio…	GenMAPP // GenMAPP // GenMAPP // GenMAPP // GenMAPP // GenMAPP // GenMAPP // GenMAPP // GenMAPP // GenMAPP // GenMAPP // GenMAPP	Complement_Activation_Classical // Complement_Activation_Classical // Complement_Activation_Classical // Complement_Activation_Classical // Complement_Activation_Classical // Complement_Activation_Classical // Complement_Activation_Classical // Complement_Activation_Classical // Complement_Activation_Classical // Complement_Activation_Classical // Complement_Activation_Classical // Complement_Act…	---	---	---	main			ENST00000474537 2955bp;	ENST00000415626	5.18287	5.06185	5.30204	3.68519	3.67753	3.88307
16844872	JUP	junction plakoglobin	coding	3.6E-6	3.16E-4	18.6	50.62	2.7027	up	NM_002230	RefSeq	Homo sapiens junction plakoglobin (JUP), transcript variant 1, mRNA.	chr17	-	39910856	39943183	GO:0001708 // GO:0002159 // GO:0003136 // GO:0003181 // GO:0003308 // GO:0007016 // GO:0007369 // GO:0007399 // GO:0016331 // GO:0016337 // GO:0016337 // GO:0016477 // GO:0030178 // GO:0042307 // GO:0043588 // GO:0045595 // GO:0048599 // GO:0050982 // GO:0051091 // GO:0051291 // GO:0060070 // GO:0071603 // GO:0071681 // GO:0090263 // GO:0001708 // GO:0002159 // GO:0003136 // GO:0003181 // GO:0003…	cell fate specification // desmosome assembly // negative regulation of heart induction by canonical Wnt receptor signaling pathway // atrioventricular valve morphogenesis // negative regulation of Wnt receptor signaling pathway involved in heart development // cytoskeletal anchoring at plasma membrane // gastrulation // nervous system development // morphogenesis of embryonic epithelium // cell-…	inferred from sequence or structural similarity // inferred from electronic annotation // inferred from sequence or structural similarity // inferred from sequence or structural similarity // inferred from sequence or structural similarity // inferred from sequence or structural similarity // inferred from sequence or structural similarity // inferred from sequence or structural similarity // inf…	GO:0005634 // GO:0005737 // GO:0005829 // GO:0005856 // GO:0005886 // GO:0005886 // GO:0005911 // GO:0005913 // GO:0005915 // GO:0005916 // GO:0009898 // GO:0015629 // GO:0016323 // GO:0016327 // GO:0016328 // GO:0016342 // GO:0016342 // GO:0030018 // GO:0030056 // GO:0030057 // GO:0030057 // GO:0032993 // GO:0071665 // GO:0005634 // GO:0005737 // GO:0005829 // GO:0005856 // GO:0005886 // GO:0005…	nucleus // cytoplasm // cytosol // cytoskeleton // plasma membrane // plasma membrane // cell-cell junction // cell-cell adherens junction // zonula adherens // fascia adherens // internal side of plasma membrane // actin cytoskeleton // basolateral plasma membrane // apicolateral plasma membrane // lateral plasma membrane // catenin complex // catenin complex // Z disc // hemidesmosome // desmos…	inferred from mutant phenotype // inferred from mutant phenotype // inferred from sequence or structural similarity // inferred from sequence or structural similarity // not recorded // inferred from direct assay // inferred from direct assay // inferred from direct assay // inferred from sequence or structural similarity // inferred from sequence or structural similarity // inferred from sequenc…	GO:0003713 // GO:0005198 // GO:0005199 // GO:0005515 // GO:0019901 // GO:0019903 // GO:0042153 // GO:0042803 // GO:0045294 // GO:0045294 // GO:0045296 // GO:0045296 // GO:0003713 // GO:0005198 // GO:0005199 // GO:0005515 // GO:0019901 // GO:0019903 // GO:0042153 // GO:0042803 // GO:0045294 // GO:0045294 // GO:0045296 // GO:0045296 // GO:0003713 // GO:0005198 // GO:0005199 // GO:0005515 // GO:0019…	transcription coactivator activity // structural molecule activity // structural constituent of cell wall // protein binding // protein kinase binding // protein phosphatase binding // RPTP-like protein binding // protein homodimerization activity // alpha-catenin binding // alpha-catenin binding // cadherin binding // cadherin binding // transcription coactivator activity // structural molecule …	inferred from direct assay // inferred from sequence or structural similarity // inferred by curator // inferred from physical interaction // inferred from sequence or structural similarity // inferred from physical interaction // inferred from sequence or structural similarity // inferred from sequence or structural similarity // inferred from physical interaction // inferred from sequence or st…	---	---	---	---	---	main					5.44949	5.81024	5.7337	4.22949	3.91899	4.45829
16686557	PIK3R3	phosphoinositide-3-kinase, regulatory subunit 3 (gamma)	coding	3.0E-6	2.72E-4	6.09	16.67	2.7027	up	NM_003629	RefSeq	Homo sapiens phosphoinositide-3-kinase, regulatory subunit 3 (gamma) (PIK3R3), transcript variant 1, mRNA.	chr1	-	46505812	46642160	GO:0008286 // GO:0008286 // GO:0008286 // GO:0008286 // GO:0008286 // GO:0008286 // GO:0008286 // GO:0008286 // GO:0008286 // GO:0008286 // GO:0008286 // GO:0008286 // GO:0008286 // GO:0008286	insulin receptor signaling pathway // insulin receptor signaling pathway // insulin receptor signaling pathway // insulin receptor signaling pathway // insulin receptor signaling pathway // insulin receptor signaling pathway // insulin receptor signaling pathway // insulin receptor signaling pathway // insulin receptor signaling pathway // insulin receptor signaling pathway // insulin receptor si…	traceable author statement // traceable author statement // traceable author statement // --- // traceable author statement // --- // traceable author statement // --- // traceable author statement // traceable author statement // --- // traceable author statement // traceable author statement // traceable author statement	GO:0005829 // GO:0005942 // GO:0005829 // GO:0005942 // GO:0005829 // GO:0005942 // GO:0005942 // GO:0005829 // GO:0005942 // GO:0005942 // GO:0005829 // GO:0005942 // GO:0005942 // GO:0005829 // GO:0005942 // GO:0005829 // GO:0005942 // GO:0005942 // GO:0005829 // GO:0005942 // GO:0005829 // GO:0005942 // GO:0005829 // GO:0005942	cytosol // phosphoinositide 3-kinase complex // cytosol // phosphoinositide 3-kinase complex // cytosol // phosphoinositide 3-kinase complex // phosphoinositide 3-kinase complex // cytosol // phosphoinositide 3-kinase complex // phosphoinositide 3-kinase complex // cytosol // phosphoinositide 3-kinase complex // phosphoinositide 3-kinase complex // cytosol // phosphoinositide 3-kinase complex // …	not recorded // inferred from electronic annotation // not recorded // inferred from electronic annotation // not recorded // inferred from electronic annotation // --- // not recorded // inferred from electronic annotation // --- // not recorded // inferred from electronic annotation // --- // not recorded // inferred from electronic annotation // not recorded // inferred from electronic annotat…	GO:0005515 // GO:0016303 // GO:0035014 // GO:0005515 // GO:0016303 // GO:0035014 // GO:0005515 // GO:0016303 // GO:0035014 // GO:0035014 // GO:0016303 // GO:0005515 // GO:0005515 // GO:0016303 // GO:0035014 // GO:0035014 // GO:0016303 // GO:0005515 // GO:0005515 // GO:0016303 // GO:0035014 // GO:0035014 // GO:0016303 // GO:0005515 // GO:0005515 // GO:0016303 // GO:0035014 // GO:0005515 // GO:0016…	protein binding // 1-phosphatidylinositol-3-kinase activity // phosphoinositide 3-kinase regulator activity // protein binding // 1-phosphatidylinositol-3-kinase activity // phosphoinositide 3-kinase regulator activity // protein binding // 1-phosphatidylinositol-3-kinase activity // phosphoinositide 3-kinase regulator activity // phosphoinositide 3-kinase regulator activity // 1-phosphatidylinos…	inferred from physical interaction // traceable author statement // inferred from electronic annotation // inferred from physical interaction // traceable author statement // inferred from electronic annotation // inferred from physical interaction // traceable author statement // inferred from electronic annotation // --- // --- // --- // inferred from physical interaction // traceable author st…	---	---	---	---	---	main				ENST00000450004 ENST00000452785	3.77285	4.14402	4.26954	2.81378	2.40919	2.54994
16716507	PPP1R3C	protein phosphatase 1, regulatory (inhibitor) subunit 3C	coding	5.0E-7	7.89E-5	241.32	644.74	2.7027	up	NM_005398	RefSeq	Homo sapiens protein phosphatase 1, regulatory (inhibitor) subunit 3C (PPP1R3C), mRNA.	chr10	-	93388197	93392858	GO:0005975 // GO:0005979 // GO:0005981 // GO:0005975 // GO:0005979 // GO:0005981 // GO:0005979 // GO:0005975 // GO:0005981 // GO:0005978 // GO:0005977 // GO:0005975 // GO:0005979 // GO:0005981 // GO:0005975 // GO:0005979 // GO:0005981	carbohydrate metabolic process // regulation of glycogen biosynthetic process // regulation of glycogen catabolic process // carbohydrate metabolic process // regulation of glycogen biosynthetic process // regulation of glycogen catabolic process // regulation of glycogen biosynthetic process // carbohydrate metabolic process // regulation of glycogen catabolic process // glycogen biosynthetic pr…	inferred from electronic annotation // inferred from electronic annotation // inferred from electronic annotation // inferred from electronic annotation // inferred from electronic annotation // inferred from electronic annotation // --- // --- // --- // --- // --- // inferred from electronic annotation // inferred from electronic annotation // inferred from electronic annotation // inferred from…	GO:0005625 // GO:0005792 // GO:0042587 // GO:0005625 // GO:0005792 // GO:0042587 // GO:0005625 // GO:0005792 // GO:0042587 // GO:0005625 // GO:0005792 // GO:0042587 // GO:0005625 // GO:0005792 // GO:0042587	soluble fraction // microsome // glycogen granule // soluble fraction // microsome // glycogen granule // soluble fraction // microsome // glycogen granule // soluble fraction // microsome // glycogen granule // soluble fraction // microsome // glycogen granule	inferred from electronic annotation // inferred from electronic annotation // inferred from electronic annotation // inferred from electronic annotation // inferred from electronic annotation // inferred from electronic annotation // --- // --- // --- // inferred from electronic annotation // inferred from electronic annotation // inferred from electronic annotation // inferred from electronic an…	GO:0004722 // GO:0005515 // GO:0019899 // GO:0004722 // GO:0005515 // GO:0019899 // GO:0005515 // GO:0004722 // GO:0019899 // GO:0004721 // GO:0004722 // GO:0005515 // GO:0019899 // GO:0004722 // GO:0005515 // GO:0019899	protein serine/threonine phosphatase activity // protein binding // enzyme binding // protein serine/threonine phosphatase activity // protein binding // enzyme binding // protein binding // protein serine/threonine phosphatase activity // enzyme binding // phosphoprotein phosphatase activity // protein serine/threonine phosphatase activity // protein binding // enzyme binding // protein serine/t…	traceable author statement // inferred from physical interaction // inferred from electronic annotation // traceable author statement // inferred from physical interaction // inferred from electronic annotation // --- // --- // --- // --- // traceable author statement // inferred from physical interaction // inferred from electronic annotation // traceable author statement // inferred from physic…	---	---	---	---	---	main					9.34193	9.29939	9.36459	7.8391	7.74993	8.11075
16872551	TGFB1	transforming growth factor, beta 1	coding	2.0E-7	3.88E-5	68.33	186.48	2.7027	up	NM_000660	RefSeq	Homo sapiens transforming growth factor, beta 1 (TGFB1), mRNA.	chr19	-	41836812	41859831	GO:0000122 // GO:0001657 // GO:0001666 // GO:0001763 // GO:0001933 // GO:0001934 // GO:0002028 // GO:0002062 // GO:0002244 // GO:0002248 // GO:0002513 // GO:0006468 // GO:0006611 // GO:0006754 // GO:0006796 // GO:0006874 // GO:0006917 // GO:0006954 // GO:0007050 // GO:0007173 // GO:0007179 // GO:0007179 // GO:0007183 // GO:0007184 // GO:0007406 // GO:0007435 // GO:0007492 // GO:0007565 // GO:0007…	negative regulation of transcription from RNA polymerase II promoter // ureteric bud development // response to hypoxia // morphogenesis of a branching structure // negative regulation of protein phosphorylation // positive regulation of protein phosphorylation // regulation of sodium ion transport // chondrocyte differentiation // hemopoietic progenitor cell differentiation // connective tissue …	inferred from electronic annotation // inferred from electronic annotation // inferred from electronic annotation // inferred from electronic annotation // inferred from direct assay // inferred from direct assay // inferred from electronic annotation // inferred from direct assay // inferred from direct assay // traceable author statement // inferred from electronic annotation // inferred from s…	GO:0005576 // GO:0005578 // GO:0005615 // GO:0005634 // GO:0005737 // GO:0005796 // GO:0009986 // GO:0030141 // GO:0030424 // GO:0043025 // GO:0005576 // GO:0005578 // GO:0005615 // GO:0005634 // GO:0005737 // GO:0005796 // GO:0009986 // GO:0030141 // GO:0030424 // GO:0043025 // GO:0005737 // GO:0031093 // GO:0009986 // GO:0030141 // GO:0005796 // GO:0005576 // GO:0030424 // GO:0005578 // GO:0005…	extracellular region // proteinaceous extracellular matrix // extracellular space // nucleus // cytoplasm // Golgi lumen // cell surface // stored secretory granule // axon // neuronal cell body // extracellular region // proteinaceous extracellular matrix // extracellular space // nucleus // cytoplasm // Golgi lumen // cell surface // stored secretory granule // axon // neuronal cell body // cyt…	not recorded // inferred from sequence or structural similarity // inferred from direct assay // inferred from direct assay // inferred from direct assay // not recorded // inferred from electronic annotation // inferred from electronic annotation // inferred from electronic annotation // inferred from electronic annotation // not recorded // inferred from sequence or structural similarity // inf…	GO:0005114 // GO:0005114 // GO:0005515 // GO:0008083 // GO:0016563 // GO:0016563 // GO:0042803 // GO:0046982 // GO:0047485 // GO:0005114 // GO:0005114 // GO:0005515 // GO:0008083 // GO:0016563 // GO:0016563 // GO:0042803 // GO:0046982 // GO:0047485 // GO:0008083 // GO:0016563 // GO:0047485 // GO:0042803 // GO:0005515 // GO:0046982 // GO:0005114 // GO:0005114 // GO:0005114 // GO:0005515 // GO:0008…	type II transforming growth factor beta receptor binding // type II transforming growth factor beta receptor binding // protein binding // growth factor activity // transcription activator activity // transcription activator activity // protein homodimerization activity // protein heterodimerization activity // protein N-terminus binding // type II transforming growth factor beta receptor binding…	inferred from direct assay // inferred from physical interaction // inferred from physical interaction // inferred from electronic annotation // inferred from direct assay // inferred from sequence or structural similarity // inferred from electronic annotation // inferred from electronic annotation // inferred from electronic annotation // inferred from direct assay // inferred from physical int…	GenMAPP // GenMAPP // GenMAPP // GenMAPP	Cell_cycle_KEGG // TGF_Beta_Signaling_Pathway // Cell_cycle_KEGG // TGF_Beta_Signaling_Pathway	---	---	---	main					7.52691	7.41613	7.69371	6.14224	6.1307	5.96581
16713762	ANXA8L1	annexin A8-like 1	coding	5.2E-6	4.06E-4	16.58	43.43	2.63158	up	NM_001098845	RefSeq	Homo sapiens annexin A8-like 1 (ANXA8L1), mRNA.	chr10	-	47157983	47174093	GO:0007596 // GO:0007596	blood coagulation // blood coagulation	--- // ---	---	---	---	GO:0005509 // GO:0005544 // GO:0005509 // GO:0005544 // GO:0005509 // GO:0005544 // GO:0005544 // GO:0005509 // GO:0005544 // GO:0005509 // GO:0005509 // GO:0005544 // GO:0005544 // GO:0005509 // GO:0005509 // GO:0005544 // GO:0005509 // GO:0005544 // GO:0005544 // GO:0005509 // GO:0005509 // GO:0005544 // GO:0005509 // GO:0005544 // GO:0005544 // GO:0005509 // GO:0005509 // GO:0005544 // GO:0005…	calcium ion binding // calcium-dependent phospholipid binding // calcium ion binding // calcium-dependent phospholipid binding // calcium ion binding // calcium-dependent phospholipid binding // calcium-dependent phospholipid binding // calcium ion binding // calcium-dependent phospholipid binding // calcium ion binding // calcium ion binding // calcium-dependent phospholipid binding // calcium-d…	inferred from electronic annotation // inferred from electronic annotation // inferred from electronic annotation // inferred from electronic annotation // inferred from electronic annotation // inferred from electronic annotation // --- // --- // --- // --- // inferred from electronic annotation // inferred from electronic annotation // --- // --- // inferred from electronic annotation // inferr…	GenMAPP // GenMAPP // GenMAPP // GenMAPP	Prostaglandin_synthesis_regulation // Prostaglandin_synthesis_regulation // Prostaglandin_synthesis_regulation // Prostaglandin_synthesis_regulation	---	---	---	main					5.24747	5.28911	5.79361	4.08202	3.8702	4.1563
17007118	C4B	complement component 4B (Chido blood group)	coding	4.4E-6	3.65E-4	13.14	34.13	2.63158	up	NM_001002029	RefSeq	Homo sapiens complement component 4B (Chido blood group) (C4B), mRNA.	chr6	+	31982539	32003195	GO:0006954 // GO:0006958 // GO:0045087 // GO:0006954 // GO:0006957 // GO:0006958 // GO:0006954 // GO:0006957 // GO:0006958 // GO:0006954 // GO:0006958 // GO:0006957 // GO:0006954 // GO:0006957 // GO:0006958 // GO:0006954 // GO:0006957 // GO:0006958 // GO:0006954 // GO:0006957 // GO:0006958 // GO:0006954 // GO:0006957 // GO:0006958 // GO:0006954 // GO:0006957 // GO:0006958 // GO:0006954 // GO:0006…	inflammatory response // complement activation, classical pathway // innate immune response // inflammatory response // complement activation, alternative pathway // complement activation, classical pathway // inflammatory response // complement activation, alternative pathway // complement activation, classical pathway // inflammatory response // complement activation, classical pathway // compl…	inferred from electronic annotation // inferred from electronic annotation // inferred from electronic annotation // inferred from electronic annotation // not recorded // inferred from electronic annotation // inferred from electronic annotation // not recorded // inferred from electronic annotation // --- // --- // --- // inferred from electronic annotation // not recorded // inferred from elec…	GO:0005576 // GO:0005615 // GO:0005576 // GO:0005615 // GO:0005576 // GO:0005615 // GO:0005576 // GO:0005615 // GO:0005576 // GO:0005615 // GO:0005576 // GO:0005615 // GO:0005576 // GO:0005615 // GO:0005576 // GO:0005615 // GO:0005576 // GO:0005615 // GO:0005576 // GO:0005615 // GO:0005576 // GO:0005615 // GO:0005576 // GO:0005615 // GO:0005576 // GO:0005615 // GO:0005576 // GO:0005615 // GO:0005…	extracellular region // extracellular space // extracellular region // extracellular space // extracellular region // extracellular space // extracellular region // extracellular space // extracellular region // extracellular space // extracellular region // extracellular space // extracellular region // extracellular space // extracellular region // extracellular space // extracellular region //…	inferred from electronic annotation // inferred from electronic annotation // not recorded // inferred from electronic annotation // not recorded // inferred from electronic annotation // --- // --- // not recorded // inferred from electronic annotation // not recorded // inferred from electronic annotation // not recorded // inferred from electronic annotation // not recorded // inferred from el…	GO:0004866 // GO:0005515 // GO:0004866 // GO:0005515 // GO:0004866 // GO:0005515 // GO:0005515 // GO:0004866 // GO:0004866 // GO:0005515 // GO:0004866 // GO:0005515 // GO:0004866 // GO:0005515 // GO:0004866 // GO:0005515 // GO:0004866 // GO:0005515 // GO:0004866 // GO:0005515 // GO:0004866 // GO:0005515 // GO:0004866 // GO:0005515 // GO:0004866 // GO:0005515 // GO:0005515 // GO:0004866 // GO:0004…	endopeptidase inhibitor activity // protein binding // endopeptidase inhibitor activity // protein binding // endopeptidase inhibitor activity // protein binding // protein binding // endopeptidase inhibitor activity // endopeptidase inhibitor activity // protein binding // endopeptidase inhibitor activity // protein binding // endopeptidase inhibitor activity // protein binding // endopeptidase …	inferred from electronic annotation // inferred from electronic annotation // inferred from electronic annotation // inferred from electronic annotation // inferred from electronic annotation // inferred from electronic annotation // --- // --- // inferred from electronic annotation // inferred from electronic annotation // inferred from electronic annotation // inferred from electronic annotatio…	GenMAPP // GenMAPP // GenMAPP // GenMAPP // GenMAPP // GenMAPP // GenMAPP // GenMAPP // GenMAPP // GenMAPP // GenMAPP // GenMAPP	Complement_Activation_Classical // Complement_Activation_Classical // Complement_Activation_Classical // Complement_Activation_Classical // Complement_Activation_Classical // Complement_Activation_Classical // Complement_Activation_Classical // Complement_Activation_Classical // Complement_Activation_Classical // Complement_Activation_Classical // Complement_Activation_Classical // Complement_Act…	---	---	---	main	ENST00000474537 5853bp;			ENST00000415626	5.19902	4.81737	5.27085	3.64182	3.53633	3.92334
16820702	CLEC18C	C-type lectin domain family 18, member C	coding	4.53E-4	0.00982	6.57	17.52	2.63158	up	NM_173619	RefSeq	Homo sapiens C-type lectin domain family 18, member C (CLEC18C), mRNA.	chr16	+	70207722	70220798	---	---	---	GO:0005576 // GO:0005576 // GO:0005576	extracellular region // extracellular region // extracellular region	--- // inferred from electronic annotation // ---	GO:0005529 // GO:0005488 // GO:0005509 // GO:0005488 // GO:0005529 // GO:0005509	sugar binding // binding // calcium ion binding // binding // sugar binding // calcium ion binding	--- // --- // --- // inferred from electronic annotation // inferred from electronic annotation // ---	---	---	---	---	---	main					4.63273	4.31921	3.44917	2.91969	2.33563	2.85098
16819484	CX3CL1	chemokine (C-X3-C motif) ligand 1	coding	3.3E-6	2.92E-4	39.72	105.46	2.63158	up	NM_002996	RefSeq	Homo sapiens chemokine (C-X3-C motif) ligand 1 (CX3CL1), mRNA.	chr16	+	57406375	57418960	GO:0006935 // GO:0006952 // GO:0006955 // GO:0007155 // GO:0019221 // GO:0030593 // GO:0030595 // GO:0032914 // GO:0043066 // GO:0045766 // GO:0048246 // GO:0048247 // GO:0050729 // GO:0050902 // GO:0051041 // GO:0060055 // GO:0006935 // GO:0006952 // GO:0006955 // GO:0007155 // GO:0019221 // GO:0030593 // GO:0030595 // GO:0032914 // GO:0043066 // GO:0045766 // GO:0048246 // GO:0048247 // GO:0050…	chemotaxis // defense response // immune response // cell adhesion // cytokine-mediated signaling pathway // neutrophil chemotaxis // leukocyte chemotaxis // positive regulation of transforming growth factor-beta1 production // negative regulation of apoptosis // positive regulation of angiogenesis // macrophage chemotaxis // lymphocyte chemotaxis // positive regulation of inflammatory response /…	inferred from electronic annotation // traceable author statement // traceable author statement // inferred from electronic annotation // traceable author statement // inferred from electronic annotation // traceable author statement // inferred from electronic annotation // inferred from electronic annotation // inferred from electronic annotation // inferred from electronic annotation // inferr…	GO:0005576 // GO:0005615 // GO:0005886 // GO:0009986 // GO:0016021 // GO:0005576 // GO:0005615 // GO:0005886 // GO:0009986 // GO:0016021 // GO:0009986 // GO:0016021 // GO:0005576 // GO:0005615 // GO:0005886 // GO:0005576 // GO:0005615 // GO:0005886 // GO:0009986 // GO:0016021	extracellular region // extracellular space // plasma membrane // cell surface // integral to membrane // extracellular region // extracellular space // plasma membrane // cell surface // integral to membrane // cell surface // integral to membrane // extracellular region // extracellular space // plasma membrane // extracellular region // extracellular space // plasma membrane // cell surface //…	inferred from direct assay // inferred from electronic annotation // inferred from electronic annotation // inferred from direct assay // inferred from direct assay // inferred from direct assay // inferred from electronic annotation // inferred from electronic annotation // inferred from direct assay // inferred from direct assay // --- // --- // --- // --- // --- // inferred from direct assay /…	GO:0005102 // GO:0005515 // GO:0008009 // GO:0005102 // GO:0005515 // GO:0008009 // GO:0005515 // GO:0005102 // GO:0008009 // GO:0005102 // GO:0005515 // GO:0008009	receptor binding // protein binding // chemokine activity // receptor binding // protein binding // chemokine activity // protein binding // receptor binding // chemokine activity // receptor binding // protein binding // chemokine activity	traceable author statement // inferred from physical interaction // traceable author statement // traceable author statement // inferred from physical interaction // traceable author statement // --- // --- // --- // traceable author statement // inferred from physical interaction // traceable author statement	---	---	---	---	---	main					6.92858	6.37717	6.86388	5.35328	5.20549	5.33234
17116384	CYorf15A	chromosome Y open reading frame 15A	coding	6.0E-6	4.41E-4	4.14	11.03	2.63158	up	NM_001005852	RefSeq	Homo sapiens chromosome Y open reading frame 15A (CYorf15A), mRNA.	chrY	+	21729235	21769056	---	---	---	---	---	---	---	---	---	---	---	---	---	---	main					3.42547	3.39717	3.57552	1.65258	2.21486	2.23482
16962407	DGKG	diacylglycerol kinase, gamma 90kDa	coding	3.7E-6	3.21E-4	5.02	13.07	2.63158	up	NM_001346	RefSeq	Homo sapiens diacylglycerol kinase, gamma 90kDa (DGKG), transcript variant 1, mRNA.	chr3	-	185864990	186080026	GO:0007165 // GO:0007205 // GO:0048666 // GO:0007165 // GO:0007205 // GO:0048666 // GO:0007165 // GO:0007205 // GO:0048666 // GO:0007165 // GO:0007205 // GO:0048666 // GO:0007165 // GO:0048666 // GO:0007205 // GO:0023034 // GO:0007165 // GO:0007205 // GO:0048666 // GO:0007205 // GO:0023034 // GO:0007165 // GO:0007205 // GO:0048666 // GO:0007205 // GO:0023034 // GO:0007165 // GO:0007205 // GO:0048…	signal transduction // activation of protein kinase C activity by G-protein coupled receptor protein signaling pathway // neuron development // signal transduction // activation of protein kinase C activity by G-protein coupled receptor protein signaling pathway // neuron development // signal transduction // activation of protein kinase C activity by G-protein coupled receptor protein signaling …	traceable author statement // inferred from electronic annotation // inferred from electronic annotation // traceable author statement // inferred from electronic annotation // inferred from electronic annotation // traceable author statement // inferred from electronic annotation // inferred from electronic annotation // traceable author statement // inferred from electronic annotation // inferr…	GO:0005737 // GO:0016020 // GO:0005737 // GO:0016020 // GO:0005737 // GO:0016020 // GO:0005737 // GO:0016020 // GO:0005737 // GO:0016020 // GO:0005737 // GO:0016020 // GO:0005737 // GO:0016020 // GO:0005737 // GO:0016020	cytoplasm // membrane // cytoplasm // membrane // cytoplasm // membrane // cytoplasm // membrane // cytoplasm // membrane // cytoplasm // membrane // cytoplasm // membrane // cytoplasm // membrane	inferred from electronic annotation // inferred from electronic annotation // inferred from electronic annotation // inferred from electronic annotation // inferred from electronic annotation // inferred from electronic annotation // inferred from electronic annotation // inferred from electronic annotation // --- // --- // inferred from electronic annotation // inferred from electronic annotatio…	GO:0000166 // GO:0004143 // GO:0005509 // GO:0005524 // GO:0016740 // GO:0000166 // GO:0004143 // GO:0005509 // GO:0005524 // GO:0016740 // GO:0000166 // GO:0004143 // GO:0005509 // GO:0005524 // GO:0016740 // GO:0000166 // GO:0004143 // GO:0005509 // GO:0005524 // GO:0016740 // GO:0005524 // GO:0004143 // GO:0016740 // GO:0005509 // GO:0000166 // GO:0005515 // GO:0008270 // GO:0000166 // GO:0004…	nucleotide binding // diacylglycerol kinase activity // calcium ion binding // ATP binding // transferase activity // nucleotide binding // diacylglycerol kinase activity // calcium ion binding // ATP binding // transferase activity // nucleotide binding // diacylglycerol kinase activity // calcium ion binding // ATP binding // transferase activity // nucleotide binding // diacylglycerol kinase a…	inferred from electronic annotation // inferred from electronic annotation // inferred from electronic annotation // inferred from electronic annotation // inferred from electronic annotation // inferred from electronic annotation // inferred from electronic annotation // inferred from electronic annotation // inferred from electronic annotation // inferred from electronic annotation // inferred …	---	---	---	---	---	main					3.93623	3.67024	3.5274	2.33195	2.08681	2.51755
16741501	DHCR7	7-dehydrocholesterol reductase	coding	9.4E-6	6.03E-4	18.17	47.27	2.63158	up	NM_001360	RefSeq	Homo sapiens 7-dehydrocholesterol reductase (DHCR7), transcript variant 1, mRNA.	chr11	-	71139239	71163914	GO:0001568 // GO:0006695 // GO:0009791 // GO:0030154 // GO:0030324 // GO:0035264 // GO:0042127 // GO:0045540 // GO:0055114 // GO:0001568 // GO:0006695 // GO:0009791 // GO:0030154 // GO:0030324 // GO:0035264 // GO:0042127 // GO:0045540 // GO:0055114 // GO:0001568 // GO:0006695 // GO:0009791 // GO:0030154 // GO:0030324 // GO:0035264 // GO:0042127 // GO:0045540 // GO:0055114 // GO:0055114 // GO:0006…	blood vessel development // cholesterol biosynthetic process // post-embryonic development // cell differentiation // lung development // multicellular organism growth // regulation of cell proliferation // regulation of cholesterol biosynthetic process // oxidation reduction // blood vessel development // cholesterol biosynthetic process // post-embryonic development // cell differentiation // l…	inferred from electronic annotation // inferred from mutant phenotype // inferred from electronic annotation // inferred from electronic annotation // inferred from electronic annotation // inferred from electronic annotation // inferred from electronic annotation // inferred from electronic annotation // inferred from electronic annotation // inferred from electronic annotation // inferred from …	GO:0005640 // GO:0005783 // GO:0005789 // GO:0016020 // GO:0016021 // GO:0005640 // GO:0005783 // GO:0005789 // GO:0016020 // GO:0016021 // GO:0005640 // GO:0005783 // GO:0005789 // GO:0016020 // GO:0016021 // GO:0016021 // GO:0016020 // GO:0005640 // GO:0005783 // GO:0005789 // GO:0005640 // GO:0005783 // GO:0005789 // GO:0016020 // GO:0016021 // GO:0016021 // GO:0016020 // GO:0005640 // GO:0005…	nuclear outer membrane // endoplasmic reticulum // endoplasmic reticulum membrane // membrane // integral to membrane // nuclear outer membrane // endoplasmic reticulum // endoplasmic reticulum membrane // membrane // integral to membrane // nuclear outer membrane // endoplasmic reticulum // endoplasmic reticulum membrane // membrane // integral to membrane // integral to membrane // membrane // …	inferred from direct assay // inferred from direct assay // not recorded // inferred from electronic annotation // inferred from electronic annotation // inferred from direct assay // inferred from direct assay // not recorded // inferred from electronic annotation // inferred from electronic annotation // inferred from direct assay // inferred from direct assay // not recorded // inferred from e…	GO:0005515 // GO:0016491 // GO:0047598 // GO:0047598 // GO:0005515 // GO:0016491 // GO:0047598 // GO:0047598 // GO:0005515 // GO:0016491 // GO:0047598 // GO:0047598 // GO:0047598 // GO:0005515 // GO:0016491 // GO:0005515 // GO:0016491 // GO:0047598 // GO:0047598 // GO:0047598 // GO:0005515 // GO:0016491 // GO:0005515 // GO:0016491 // GO:0047598 // GO:0047598	protein binding // oxidoreductase activity // 7-dehydrocholesterol reductase activity // 7-dehydrocholesterol reductase activity // protein binding // oxidoreductase activity // 7-dehydrocholesterol reductase activity // 7-dehydrocholesterol reductase activity // protein binding // oxidoreductase activity // 7-dehydrocholesterol reductase activity // 7-dehydrocholesterol reductase activity // 7-d…	inferred from physical interaction // inferred from electronic annotation // not recorded // inferred from direct assay // inferred from physical interaction // inferred from electronic annotation // not recorded // inferred from direct assay // inferred from physical interaction // inferred from electronic annotation // not recorded // inferred from direct assay // --- // --- // --- // inferred …	GenMAPP // GenMAPP // GenMAPP	Cholesterol_Biosynthesis // Cholesterol_Biosynthesis // Cholesterol_Biosynthesis	---	---	---	main			TCONS_l2_00005381-XLOC_l2_002709 6287bp;		5.44773	5.67853	5.5709	3.96436	4.56397	3.977
16928115	GSTT2	glutathione S-transferase theta 2	coding	2.862E-4	0.00702	17.57	45.86	2.63158	up	NM_000854	RefSeq	Homo sapiens glutathione S-transferase theta 2 (GSTT2), mRNA.	chr22	+	24322314	24326106	---	---	---	GO:0005737 // GO:0005737 // GO:0005737 // GO:0005737	cytoplasm // cytoplasm // cytoplasm // cytoplasm	inferred from electronic annotation // inferred from electronic annotation // inferred from electronic annotation // ---	GO:0004364 // GO:0004364 // GO:0016740 // GO:0004364 // GO:0004364 // GO:0016740 // GO:0004364 // GO:0004364 // GO:0016740 // GO:0004364 // GO:0016740	glutathione transferase activity // glutathione transferase activity // transferase activity // glutathione transferase activity // glutathione transferase activity // transferase activity // glutathione transferase activity // glutathione transferase activity // transferase activity // glutathione transferase activity // transferase activity	inferred from electronic annotation // non-traceable author statement // inferred from electronic annotation // inferred from electronic annotation // non-traceable author statement // inferred from electronic annotation // inferred from electronic annotation // non-traceable author statement // inferred from electronic annotation // --- // ---	---	---	---	---	---	main					6.11978	4.86531	5.58063	4.1504	4.1629	4.04689
16669850	ITGA10	integrin, alpha 10	coding	2.0E-6	2.13E-4	7.81	20.33	2.63158	up	NM_003637	RefSeq	Homo sapiens integrin, alpha 10 (ITGA10), mRNA.	chr1	+	145524891	145543868	GO:0007155 // GO:0007160 // GO:0007229 // GO:0007155 // GO:0007160 // GO:0007229 // GO:0007155 // GO:0007160 // GO:0007229 // GO:0007155 // GO:0007160 // GO:0007229	cell adhesion // cell-matrix adhesion // integrin-mediated signaling pathway // cell adhesion // cell-matrix adhesion // integrin-mediated signaling pathway // cell adhesion // cell-matrix adhesion // integrin-mediated signaling pathway // cell adhesion // cell-matrix adhesion // integrin-mediated signaling pathway	inferred from electronic annotation // traceable author statement // inferred from electronic annotation // inferred from electronic annotation // traceable author statement // inferred from electronic annotation // --- // --- // --- // inferred from electronic annotation // traceable author statement // inferred from electronic annotation	GO:0005886 // GO:0008305 // GO:0016021 // GO:0005886 // GO:0008305 // GO:0016021 // GO:0016021 // GO:0008305 // GO:0005886 // GO:0005886 // GO:0008305 // GO:0016021	plasma membrane // integrin complex // integral to membrane // plasma membrane // integrin complex // integral to membrane // integral to membrane // integrin complex // plasma membrane // plasma membrane // integrin complex // integral to membrane	not recorded // inferred from electronic annotation // inferred from electronic annotation // not recorded // inferred from electronic annotation // inferred from electronic annotation // --- // --- // --- // not recorded // inferred from electronic annotation // inferred from electronic annotation	GO:0004872 // GO:0005518 // GO:0004872 // GO:0005518 // GO:0005518 // GO:0004872 // GO:0004872 // GO:0005518	receptor activity // collagen binding // receptor activity // collagen binding // collagen binding // receptor activity // receptor activity // collagen binding	inferred from electronic annotation // traceable author statement // inferred from electronic annotation // traceable author statement // --- // --- // inferred from electronic annotation // traceable author statement	GenMAPP // GenMAPP	Integrin-mediated_cell_adhesion_KEGG // Integrin-mediated_cell_adhesion_KEGG	---	---	---	main					4.19982	4.60748	4.23716	2.81894	2.94171	3.09132
16914096	KCNK15	potassium channel, subfamily K, member 15	coding	2.7E-6	2.53E-4	102.65	273.59	2.63158	up	NM_022358	RefSeq	Homo sapiens potassium channel, subfamily K, member 15 (KCNK15), mRNA.	chr20	+	43374421	43383718	GO:0006811 // GO:0006813 // GO:0006811 // GO:0006813 // GO:0006811 // GO:0006813 // GO:0006811 // GO:0006813	ion transport // potassium ion transport // ion transport // potassium ion transport // ion transport // potassium ion transport // ion transport // potassium ion transport	inferred from electronic annotation // inferred from electronic annotation // inferred from electronic annotation // inferred from electronic annotation // --- // --- // inferred from electronic annotation // inferred from electronic annotation	GO:0016020 // GO:0016021 // GO:0016020 // GO:0016021 // GO:0016020 // GO:0016021 // GO:0016020 // GO:0016021	membrane // integral to membrane // membrane // integral to membrane // membrane // integral to membrane // membrane // integral to membrane	inferred from electronic annotation // inferred from electronic annotation // inferred from electronic annotation // inferred from electronic annotation // --- // --- // inferred from electronic annotation // inferred from electronic annotation	GO:0005244 // GO:0005267 // GO:0005244 // GO:0005267 // GO:0005267 // GO:0005244 // GO:0005267	voltage-gated ion channel activity // potassium channel activity // voltage-gated ion channel activity // potassium channel activity // potassium channel activity // voltage-gated ion channel activity // potassium channel activity	inferred from direct assay // inferred from electronic annotation // inferred from direct assay // inferred from electronic annotation // --- // inferred from direct assay // inferred from electronic annotation	---	---	---	---	---	main				NR_034104	8.30209	7.95001	8.04367	6.78042	6.39724	6.82238
16684310	LAPTM5	lysosomal protein transmembrane 5	coding	1.2E-5	7.24E-4	13.74	36.04	2.63158	up	NM_006762	RefSeq	Homo sapiens lysosomal protein transmembrane 5 (LAPTM5), mRNA.	chr1	-	31205315	31230683	GO:0006810 // GO:0006810 // GO:0006810 // GO:0006810 // GO:0006810 // GO:0006810	transport // transport // transport // transport // transport // transport	inferred from electronic annotation // inferred from electronic annotation // --- // inferred from electronic annotation // inferred from electronic annotation // ---	GO:0005764 // GO:0005765 // GO:0005887 // GO:0016020 // GO:0005764 // GO:0005765 // GO:0005887 // GO:0016020 // GO:0005887 // GO:0005764 // GO:0005765 // GO:0016020 // GO:0016021 // GO:0005764 // GO:0005765 // GO:0005887 // GO:0016020 // GO:0005764 // GO:0005765 // GO:0005887 // GO:0016020 // GO:0016021 // GO:0005764	lysosome // lysosomal membrane // integral to plasma membrane // membrane // lysosome // lysosomal membrane // integral to plasma membrane // membrane // integral to plasma membrane // lysosome // lysosomal membrane // membrane // integral to membrane // lysosome // lysosomal membrane // integral to plasma membrane // membrane // lysosome // lysosomal membrane // integral to plasma membrane // me…	traceable author statement // inferred from electronic annotation // inferred from electronic annotation // inferred from electronic annotation // traceable author statement // inferred from electronic annotation // inferred from electronic annotation // inferred from electronic annotation // --- // --- // --- // --- // --- // traceable author statement // inferred from electronic annotation // i…	---	---	---	---	---	---	---	---	main					5.1155	5.1209	5.28651	3.34343	4.00657	3.94735
17044414	NFE2L3	nuclear factor (erythroid-derived 2)-like 3	coding	5.0E-6	3.98E-4	5.99	15.57	2.63158	up	NM_004289	RefSeq	Homo sapiens nuclear factor (erythroid-derived 2)-like 3 (NFE2L3), mRNA.	chr7	+	26191847	26226757	GO:0006355 // GO:0006366 // GO:0006355 // GO:0006366 // GO:0006366 // GO:0006355 // GO:0045449 // GO:0006355 // GO:0006366	regulation of transcription, DNA-dependent // transcription from RNA polymerase II promoter // regulation of transcription, DNA-dependent // transcription from RNA polymerase II promoter // transcription from RNA polymerase II promoter // regulation of transcription, DNA-dependent // regulation of transcription // regulation of transcription, DNA-dependent // transcription from RNA polymerase II …	inferred from electronic annotation // traceable author statement // inferred from electronic annotation // traceable author statement // --- // --- // --- // inferred from electronic annotation // traceable author statement	GO:0005634 // GO:0005634 // GO:0005634 // GO:0005634	nucleus // nucleus // nucleus // nucleus	inferred from electronic annotation // inferred from electronic annotation // --- // inferred from electronic annotation	GO:0003700 // GO:0003713 // GO:0043565 // GO:0046983 // GO:0003700 // GO:0003713 // GO:0043565 // GO:0046983 // GO:0003713 // GO:0003700 // GO:0043565 // GO:0046983 // GO:0003677 // GO:0003700 // GO:0003713 // GO:0043565 // GO:0046983	sequence-specific DNA binding transcription factor activity // transcription coactivator activity // sequence-specific DNA binding // protein dimerization activity // sequence-specific DNA binding transcription factor activity // transcription coactivator activity // sequence-specific DNA binding // protein dimerization activity // transcription coactivator activity // sequence-specific DNA bindi…	inferred from electronic annotation // traceable author statement // inferred from electronic annotation // inferred from electronic annotation // inferred from electronic annotation // traceable author statement // inferred from electronic annotation // inferred from electronic annotation // --- // --- // --- // --- // --- // inferred from electronic annotation // traceable author statement // i…	---	---	Pfam	IPR011700	Basic leucine zipper	main					3.65478	4.10451	4.13201	2.39825	2.54361	2.76371
17061106	RASA4	RAS p21 protein activator 4	coding	1.2E-6	1.46E-4	46.89	123.34	2.63158	up	NM_006989	RefSeq	Homo sapiens RAS p21 protein activator 4 (RASA4), transcript variant 1, mRNA.	chr7	-	102131433	102131570	GO:0007165 // GO:0023034 // GO:0051056 // GO:0007165 // GO:0023034 // GO:0051056 // GO:0007165 // GO:0051056 // GO:0023034 // GO:0007165 // GO:0051056 // GO:0023034	signal transduction // intracellular signaling pathway // regulation of small GTPase mediated signal transduction // signal transduction // intracellular signaling pathway // regulation of small GTPase mediated signal transduction // signal transduction // regulation of small GTPase mediated signal transduction // intracellular signaling pathway // signal transduction // regulation of small GTPas…	inferred from electronic annotation // inferred from electronic annotation // inferred from electronic annotation // inferred from electronic annotation // inferred from electronic annotation // inferred from electronic annotation // --- // --- // --- // --- // --- // ---	GO:0005622 // GO:0005737 // GO:0005829 // GO:0005886 // GO:0005622 // GO:0005737 // GO:0005829 // GO:0005886 // GO:0005737 // GO:0005829 // GO:0005886 // GO:0005622 // GO:0005829 // GO:0005886 // GO:0005737 // GO:0005622	intracellular // cytoplasm // cytosol // plasma membrane // intracellular // cytoplasm // cytosol // plasma membrane // cytoplasm // cytosol // plasma membrane // intracellular // cytosol // plasma membrane // cytoplasm // intracellular	inferred from electronic annotation // inferred from electronic annotation // inferred from electronic annotation // inferred from electronic annotation // inferred from electronic annotation // inferred from electronic annotation // inferred from electronic annotation // inferred from electronic annotation // --- // --- // --- // --- // --- // --- // --- // ---	GO:0005096 // GO:0005096 // GO:0046872 // GO:0005096 // GO:0005096 // GO:0046872 // GO:0046872 // GO:0005096 // GO:0005096 // GO:0046872	GTPase activator activity // GTPase activator activity // metal ion binding // GTPase activator activity // GTPase activator activity // metal ion binding // metal ion binding // GTPase activator activity // GTPase activator activity // metal ion binding	inferred from direct assay // inferred from electronic annotation // inferred from electronic annotation // inferred from direct assay // inferred from electronic annotation // inferred from electronic annotation // --- // --- // --- // ---	---	---	---	---	---	main		ENST00000504157	ENST00000488284 2388bp;		6.80584	6.984	7.05765	5.71763	5.29667	5.59494
16824352	XYLT1	xylosyltransferase I	coding	6.0E-7	9.18E-5	171.96	452.02	2.63158	up	NM_022166	RefSeq	Homo sapiens xylosyltransferase I (XYLT1), mRNA.	chr16	-	17196181	17564738	GO:0006024 // GO:0030166 // GO:0034605 // GO:0048681 // GO:0070555 // GO:0006024 // GO:0030166 // GO:0034605 // GO:0048681 // GO:0070555 // GO:0006024 // GO:0048681 // GO:0070555 // GO:0034605 // GO:0030166	glycosaminoglycan biosynthetic process // proteoglycan biosynthetic process // cellular response to heat // negative regulation of axon regeneration // response to interleukin-1 // glycosaminoglycan biosynthetic process // proteoglycan biosynthetic process // cellular response to heat // negative regulation of axon regeneration // response to interleukin-1 // glycosaminoglycan biosynthetic proces…	traceable author statement // inferred from electronic annotation // inferred from electronic annotation // inferred from electronic annotation // inferred from electronic annotation // traceable author statement // inferred from electronic annotation // inferred from electronic annotation // inferred from electronic annotation // inferred from electronic annotation // --- // --- // --- // --- //…	GO:0000139 // GO:0005576 // GO:0005783 // GO:0005789 // GO:0005794 // GO:0016020 // GO:0016021 // GO:0000139 // GO:0005576 // GO:0005783 // GO:0005789 // GO:0005794 // GO:0016020 // GO:0016021 // GO:0016020 // GO:0016021 // GO:0005783 // GO:0005794 // GO:0000139 // GO:0005576 // GO:0005789	Golgi membrane // extracellular region // endoplasmic reticulum // endoplasmic reticulum membrane // Golgi apparatus // membrane // integral to membrane // Golgi membrane // extracellular region // endoplasmic reticulum // endoplasmic reticulum membrane // Golgi apparatus // membrane // integral to membrane // membrane // integral to membrane // endoplasmic reticulum // Golgi apparatus // Golgi m…	inferred from electronic annotation // inferred from electronic annotation // inferred from electronic annotation // inferred from electronic annotation // inferred from electronic annotation // inferred from electronic annotation // inferred from electronic annotation // inferred from electronic annotation // inferred from electronic annotation // inferred from electronic annotation // inferred …	GO:0008375 // GO:0016757 // GO:0030158 // GO:0008375 // GO:0016757 // GO:0030158 // GO:0016757 // GO:0030158 // GO:0008375	acetylglucosaminyltransferase activity // transferase activity, transferring glycosyl groups // protein xylosyltransferase activity // acetylglucosaminyltransferase activity // transferase activity, transferring glycosyl groups // protein xylosyltransferase activity // transferase activity, transferring glycosyl groups // protein xylosyltransferase activity // acetylglucosaminyltransferase activi…	inferred from electronic annotation // inferred from electronic annotation // traceable author statement // inferred from electronic annotation // inferred from electronic annotation // traceable author statement // --- // --- // ---	---	---	---	---	---	main					8.71717	8.78142	8.97028	7.58793	7.26365	7.38167
16924268	NRIP1	nuclear receptor interacting protein 1	coding	7.2E-6	5.0E-4	66.74	169.25	2.5641	up	NM_003489	RefSeq	Homo sapiens nuclear receptor interacting protein 1 (NRIP1), mRNA.	chr21	-	16333556	16437321	GO:0000122 // GO:0001543 // GO:0019915 // GO:0030521 // GO:0030728 // GO:0045449 // GO:0045893 // GO:0045944 // GO:0000122 // GO:0001543 // GO:0019915 // GO:0030521 // GO:0030728 // GO:0045449 // GO:0045893 // GO:0045944 // GO:0030728 // GO:0045944 // GO:0000122 // GO:0001543 // GO:0019915 // GO:0045893 // GO:0030521 // GO:0045449 // GO:0000122 // GO:0001543 // GO:0019915 // GO:0030521 // GO:0030…	negative regulation of transcription from RNA polymerase II promoter // ovarian follicle rupture // lipid storage // androgen receptor signaling pathway // ovulation // regulation of transcription // positive regulation of transcription, DNA-dependent // positive regulation of transcription from RNA polymerase II promoter // negative regulation of transcription from RNA polymerase II promoter // …	inferred from direct assay // inferred from electronic annotation // inferred from electronic annotation // non-traceable author statement // inferred from electronic annotation // inferred from electronic annotation // non-traceable author statement // inferred from direct assay // inferred from direct assay // inferred from electronic annotation // inferred from electronic annotation // non-tra…	GO:0000118 // GO:0005634 // GO:0000118 // GO:0005634 // GO:0005634 // GO:0000118 // GO:0000118 // GO:0005634 // GO:0005634 // GO:0000118 // GO:0000118 // GO:0005634 // GO:0005634 // GO:0000118 // GO:0000118 // GO:0005634 // GO:0000118 // GO:0005634	histone deacetylase complex // nucleus // histone deacetylase complex // nucleus // nucleus // histone deacetylase complex // histone deacetylase complex // nucleus // nucleus // histone deacetylase complex // histone deacetylase complex // nucleus // nucleus // histone deacetylase complex // histone deacetylase complex // nucleus // histone deacetylase complex // nucleus	inferred from electronic annotation // inferred from direct assay // inferred from electronic annotation // inferred from direct assay // --- // --- // inferred from electronic annotation // inferred from direct assay // --- // --- // inferred from electronic annotation // inferred from direct assay // --- // --- // inferred from electronic annotation // inferred from direct assay // inferred fro…	GO:0003713 // GO:0003713 // GO:0003714 // GO:0005102 // GO:0005515 // GO:0030331 // GO:0035257 // GO:0035259 // GO:0042826 // GO:0046965 // GO:0050681 // GO:0003713 // GO:0003713 // GO:0003714 // GO:0005102 // GO:0005515 // GO:0030331 // GO:0035257 // GO:0035259 // GO:0042826 // GO:0046965 // GO:0050681 // GO:0035259 // GO:0005515 // GO:0005102 // GO:0003714 // GO:0003713 // GO:0050681 // GO:0030…	transcription coactivator activity // transcription coactivator activity // transcription corepressor activity // receptor binding // protein binding // estrogen receptor binding // nuclear hormone receptor binding // glucocorticoid receptor binding // histone deacetylase binding // retinoid X receptor binding // androgen receptor binding // transcription coactivator activity // transcription coa…	inferred from direct assay // non-traceable author statement // inferred from direct assay // inferred from electronic annotation // inferred from physical interaction // inferred from physical interaction // inferred from physical interaction // inferred from physical interaction // inferred from electronic annotation // inferred from electronic annotation // non-traceable author statement // in…	GenMAPP // GenMAPP	Ovarian_Infertility_Genes // Ovarian_Infertility_Genes	---	---	---	main				ENST00000446301 ENST00000436429 AF130090	7.32117	7.40569	7.49037	6.17421	5.67677	6.28571
17074449	SGK223	homolog of rat pragma of Rnd2	coding	2.0E-7	3.88E-5	5.67	14.64	2.5641	up	NM_001080826	RefSeq	Homo sapiens homolog of rat pragma of Rnd2 (SGK223), mRNA.	chr8	-	8175258	8244008	GO:0006468 // GO:0006468 // GO:0006468 // GO:0006468 // GO:0006468	protein phosphorylation // protein phosphorylation // protein amino acid phosphorylation // protein phosphorylation // protein amino acid phosphorylation	inferred from electronic annotation // inferred from electronic annotation // --- // inferred from electronic annotation // ---	---	---	---	GO:0000166 // GO:0004715 // GO:0005524 // GO:0016740 // GO:0000166 // GO:0004715 // GO:0005524 // GO:0016740 // GO:0005524 // GO:0004715 // GO:0016740 // GO:0000166 // GO:0004672 // GO:0004674 // GO:0004713 // GO:0000166 // GO:0004715 // GO:0005524 // GO:0016740 // GO:0004672 // GO:0005524 // GO:0004674	nucleotide binding // non-membrane spanning protein tyrosine kinase activity // ATP binding // transferase activity // nucleotide binding // non-membrane spanning protein tyrosine kinase activity // ATP binding // transferase activity // ATP binding // non-membrane spanning protein tyrosine kinase activity // transferase activity // nucleotide binding // protein kinase activity // protein serine/…	inferred from electronic annotation // inferred from electronic annotation // inferred from electronic annotation // inferred from electronic annotation // inferred from electronic annotation // inferred from electronic annotation // inferred from electronic annotation // inferred from electronic annotation // --- // --- // --- // --- // --- // --- // --- // inferred from electronic annotation //…	---	---	---	---	---	main					3.76053	3.96473	3.89945	2.50856	2.47603	2.48187
16911804	SLC24A3	solute carrier family 24 (sodium/potassium/calcium exchanger), member 3	coding	2.575E-4	0.00653	5.23	13.4	2.5641	up	NM_020689	RefSeq	Homo sapiens solute carrier family 24 (sodium/potassium/calcium exchanger), member 3 (SLC24A3), mRNA.	chr20	+	19193290	19703545	GO:0006812 // GO:0006813 // GO:0006814 // GO:0006816 // GO:0006874 // GO:0055085 // GO:0006812 // GO:0006813 // GO:0006814 // GO:0006816 // GO:0006874 // GO:0055085 // GO:0006812 // GO:0006814 // GO:0006816 // GO:0006813 // GO:0006874 // GO:0055085	cation transport // potassium ion transport // sodium ion transport // calcium ion transport // cellular calcium ion homeostasis // transmembrane transport // cation transport // potassium ion transport // sodium ion transport // calcium ion transport // cellular calcium ion homeostasis // transmembrane transport // cation transport // sodium ion transport // calcium ion transport // potassium io…	inferred from electronic annotation // inferred from electronic annotation // inferred from electronic annotation // inferred from electronic annotation // inferred from electronic annotation // inferred from electronic annotation // inferred from electronic annotation // inferred from electronic annotation // inferred from electronic annotation // inferred from electronic annotation // inferred …	GO:0016020 // GO:0016021 // GO:0016020 // GO:0016021 // GO:0016020 // GO:0016021	membrane // integral to membrane // membrane // integral to membrane // membrane // integral to membrane	inferred from electronic annotation // inferred from electronic annotation // inferred from electronic annotation // inferred from electronic annotation // --- // ---	GO:0008273 // GO:0015293 // GO:0015297 // GO:0008273 // GO:0015293 // GO:0015297 // GO:0008273 // GO:0015297 // GO:0015293	calcium, potassium:sodium antiporter activity // symporter activity // antiporter activity // calcium, potassium:sodium antiporter activity // symporter activity // antiporter activity // calcium, potassium:sodium antiporter activity // antiporter activity // symporter activity	inferred from electronic annotation // inferred from electronic annotation // inferred from electronic annotation // inferred from electronic annotation // inferred from electronic annotation // inferred from electronic annotation // --- // --- // ---	---	---	---	---	---	main				ENST00000446849 ENST00000435992	3.39555	3.78504	4.06145	2.74268	1.78098	2.59518
16806521	CHRFAM7A	CHRNA7 (cholinergic receptor, nicotinic, alpha 7, exons 5-10) and FAM7A (family with sequence similarity 7A, exons A-E) fusion	coding	1.176E-4	0.00371	6.76	16.72	2.5	up	NM_139320	RefSeq	Homo sapiens CHRNA7 (cholinergic receptor, nicotinic, alpha 7, exons 5-10) and FAM7A (family with sequence similarity 7A, exons A-E) fusion (CHRFAM7A), transcript variant 1, mRNA.	chr15	-	30653443	30685864	GO:0006811 // GO:0006811 // GO:0006811 // GO:0006811 // GO:0006810 // GO:0006811 // GO:0006810 // GO:0006811 // GO:0006810	ion transport // ion transport // ion transport // ion transport // transport // ion transport // transport // ion transport // transport	inferred from electronic annotation // inferred from electronic annotation // inferred from electronic annotation // --- // --- // --- // --- // --- // ---	GO:0016021 // GO:0045211 // GO:0016021 // GO:0045211 // GO:0016021 // GO:0045211 // GO:0016020 // GO:0016021 // GO:0016021 // GO:0045211 // GO:0016020 // GO:0016020 // GO:0016021	integral to membrane // postsynaptic membrane // integral to membrane // postsynaptic membrane // integral to membrane // postsynaptic membrane // membrane // integral to membrane // integral to membrane // postsynaptic membrane // membrane // membrane // integral to membrane	inferred from electronic annotation // inferred from electronic annotation // inferred from electronic annotation // inferred from electronic annotation // inferred from electronic annotation // inferred from electronic annotation // --- // --- // --- // --- // --- // --- // ---	GO:0005230 // GO:0005230 // GO:0005230 // GO:0005230 // GO:0005230 // GO:0005230	extracellular ligand-gated ion channel activity // extracellular ligand-gated ion channel activity // extracellular ligand-gated ion channel activity // extracellular ligand-gated ion channel activity // extracellular ligand-gated ion channel activity // extracellular ligand-gated ion channel activity	inferred from electronic annotation // inferred from electronic annotation // inferred from electronic annotation // --- // --- // ---	---	---	Pfam	IPR006202	Neurotransmitter-gated ion-channel ligand-binding	main					4.07692	4.42847	3.69428	3.08105	2.36911	2.77686
16946280	CLSTN2	calsyntenin 2	coding	1.55E-5	8.59E-4	7.34	18.52	2.5	up	NM_022131	RefSeq	Homo sapiens calsyntenin 2 (CLSTN2), mRNA.	chr3	+	139654027	140286919	GO:0007155 // GO:0007156 // GO:0007155 // GO:0007156 // GO:0007155 // GO:0007156 // GO:0007155 // GO:0007156 // GO:0007155 // GO:0007156 // GO:0007156	cell adhesion // homophilic cell adhesion // cell adhesion // homophilic cell adhesion // cell adhesion // homophilic cell adhesion // cell adhesion // homophilic cell adhesion // cell adhesion // homophilic cell adhesion // homophilic cell adhesion	inferred from electronic annotation // inferred from electronic annotation // inferred from electronic annotation // inferred from electronic annotation // --- // --- // inferred from electronic annotation // inferred from electronic annotation // inferred from electronic annotation // inferred from electronic annotation // ---	GO:0000139 // GO:0005783 // GO:0005789 // GO:0005794 // GO:0005886 // GO:0016021 // GO:0045211 // GO:0000139 // GO:0005783 // GO:0005789 // GO:0005794 // GO:0005886 // GO:0016021 // GO:0045211 // GO:0005794 // GO:0016021 // GO:0005886 // GO:0005789 // GO:0005783 // GO:0045211 // GO:0000139 // GO:0016020 // GO:0000139 // GO:0005783 // GO:0005789 // GO:0005794 // GO:0005886 // GO:0016021 // GO:0045…	Golgi membrane // endoplasmic reticulum // endoplasmic reticulum membrane // Golgi apparatus // plasma membrane // integral to membrane // postsynaptic membrane // Golgi membrane // endoplasmic reticulum // endoplasmic reticulum membrane // Golgi apparatus // plasma membrane // integral to membrane // postsynaptic membrane // Golgi apparatus // integral to membrane // plasma membrane // endoplasm…	inferred from electronic annotation // inferred from electronic annotation // inferred from electronic annotation // inferred from electronic annotation // inferred from electronic annotation // inferred from electronic annotation // inferred from electronic annotation // inferred from electronic annotation // inferred from electronic annotation // inferred from electronic annotation // inferred …	GO:0005509 // GO:0005509 // GO:0005509 // GO:0005509 // GO:0005509 // GO:0005509	calcium ion binding // calcium ion binding // calcium ion binding // calcium ion binding // calcium ion binding // calcium ion binding	inferred from electronic annotation // inferred from electronic annotation // --- // inferred from electronic annotation // inferred from electronic annotation // ---	---	---	---	---	---	main				ENST00000509191 ENST00000483759 ENST00000513309 XR_112576	4.34346	4.00076	4.29773	3.08708	3.01704	2.47626
17081002	FAM84B	family with sequence similarity 84, member B	coding	3.1E-6	2.79E-4	8.49	21.19	2.5	up	NM_174911	RefSeq	Homo sapiens family with sequence similarity 84, member B (FAM84B), mRNA.	chr8	-	127564683	127570711	---	---	---	GO:0005737 // GO:0005886 // GO:0005737 // GO:0005886 // GO:0005737 // GO:0005886 // GO:0005737 // GO:0005886	cytoplasm // plasma membrane // cytoplasm // plasma membrane // cytoplasm // plasma membrane // cytoplasm // plasma membrane	inferred from direct assay // inferred from direct assay // inferred from direct assay // inferred from direct assay // --- // --- // inferred from direct assay // inferred from direct assay	GO:0005515 // GO:0005515 // GO:0005515 // GO:0005515	protein binding // protein binding // protein binding // protein binding	inferred from physical interaction // inferred from physical interaction // --- // inferred from physical interaction	---	---	---	---	---	main				ENST00000524320 ENST00000517773	4.48485	4.38218	4.3571	3.13402	2.78421	3.29331
16685571	FHL3	four and a half LIM domains 3	coding	1.2E-6	1.46E-4	21.93	55.33	2.5	up	NM_004468	RefSeq	Homo sapiens four and a half LIM domains 3 (FHL3), mRNA.	chr1	-	38462442	38471278	GO:0007517 // GO:0030036 // GO:0007517 // GO:0030036 // GO:0030036 // GO:0007517 // GO:0007517 // GO:0030036	muscle organ development // actin cytoskeleton organization // muscle organ development // actin cytoskeleton organization // actin cytoskeleton organization // muscle organ development // muscle organ development // actin cytoskeleton organization	traceable author statement // inferred from electronic annotation // traceable author statement // inferred from electronic annotation // --- // --- // traceable author statement // inferred from electronic annotation	GO:0001725 // GO:0005634 // GO:0030018 // GO:0001725 // GO:0005634 // GO:0030018 // GO:0030018 // GO:0001725 // GO:0005634 // GO:0001725 // GO:0005634 // GO:0030018	stress fiber // nucleus // Z disc // stress fiber // nucleus // Z disc // Z disc // stress fiber // nucleus // stress fiber // nucleus // Z disc	inferred from electronic annotation // inferred from electronic annotation // inferred from electronic annotation // inferred from electronic annotation // inferred from electronic annotation // inferred from electronic annotation // --- // --- // --- // inferred from electronic annotation // inferred from electronic annotation // inferred from electronic annotation	GO:0003779 // GO:0008270 // GO:0046872 // GO:0003779 // GO:0008270 // GO:0046872 // GO:0046872 // GO:0003779 // GO:0008270 // GO:0003779 // GO:0008270 // GO:0046872	actin binding // zinc ion binding // metal ion binding // actin binding // zinc ion binding // metal ion binding // metal ion binding // actin binding // zinc ion binding // actin binding // zinc ion binding // metal ion binding	inferred from electronic annotation // inferred from electronic annotation // inferred from electronic annotation // inferred from electronic annotation // inferred from electronic annotation // inferred from electronic annotation // --- // --- // --- // inferred from electronic annotation // inferred from electronic annotation // inferred from electronic annotation	---	---	---	---	---	main					5.8884	5.60003	5.89002	4.30715	4.57573	4.43691
16735873	GALNTL4	UDP-N-acetyl-alpha-D-galactosamine:polypeptide N-acetylgalactosaminyltransferase-like 4	coding	2.8E-5	0.0013	7.33	18.46	2.5	up	NM_198516	RefSeq	Homo sapiens UDP-N-acetyl-alpha-D-galactosamine:polypeptide N-acetylgalactosaminyltransferase-like 4 (GALNTL4), mRNA.	chr11	-	11292421	11643561	---	---	---	GO:0000139 // GO:0005794 // GO:0016020 // GO:0016021 // GO:0000139 // GO:0005794 // GO:0016020 // GO:0016021 // GO:0016021 // GO:0000139 // GO:0005794 // GO:0016020 // GO:0000139 // GO:0005794 // GO:0016020 // GO:0016021	Golgi membrane // Golgi apparatus // membrane // integral to membrane // Golgi membrane // Golgi apparatus // membrane // integral to membrane // integral to membrane // Golgi membrane // Golgi apparatus // membrane // Golgi membrane // Golgi apparatus // membrane // integral to membrane	inferred from electronic annotation // inferred from electronic annotation // inferred from electronic annotation // inferred from electronic annotation // inferred from electronic annotation // inferred from electronic annotation // inferred from electronic annotation // inferred from electronic annotation // --- // --- // --- // --- // inferred from electronic annotation // inferred from electr…	GO:0004653 // GO:0005529 // GO:0016757 // GO:0004653 // GO:0005529 // GO:0016757 // GO:0005529 // GO:0004653 // GO:0016757 // GO:0004653 // GO:0005529 // GO:0016757	polypeptide N-acetylgalactosaminyltransferase activity // sugar binding // transferase activity, transferring glycosyl groups // polypeptide N-acetylgalactosaminyltransferase activity // sugar binding // transferase activity, transferring glycosyl groups // sugar binding // polypeptide N-acetylgalactosaminyltransferase activity // transferase activity, transferring glycosyl groups // polypeptide …	inferred from electronic annotation // inferred from electronic annotation // inferred from electronic annotation // inferred from electronic annotation // inferred from electronic annotation // inferred from electronic annotation // --- // --- // --- // inferred from electronic annotation // inferred from electronic annotation // inferred from electronic annotation	---	---	---	---	---	main		NR_002207			3.9001	4.03526	4.6923	2.81939	2.85713	2.89884
16880669	HSPC159	galectin-related protein	coding	9.0E-7	1.21E-4	75.78	187.47	2.5	up	NM_014181	RefSeq	Homo sapiens galectin-related protein (HSPC159), mRNA.	chr2	+	64681103	64688517	---	---	---	GO:0005622 // GO:0005622 // GO:0005622	intracellular // intracellular // intracellular	inferred from direct assay // inferred from direct assay // inferred from direct assay	GO:0005529 // GO:0005529 // GO:0005529	sugar binding // sugar binding // sugar binding	inferred from electronic annotation // inferred from electronic annotation // inferred from electronic annotation	---	---	---	---	---	main					7.63456	7.5112	7.51403	6.37938	6.27322	6.03405
[truncated: 1,535 more rows]

## Sheet: Differentially expressed ncRNAs
Probe Set ID	ncRNA	Description	type	P-value	FDR	Geom mean of intensities in class hnp-con	Geom mean of intensities in class hnp	Fold-change(hnp/hnp-con)	style	ncRNA Accession	ncRNA Source	ncRna - Description	Chromosome	Strand	Start	Stop	GO Biological Process ID	GO Biological Process Term	GO Biological Process Evidence	GO Cellular Component ID	GO Cellular Component Term	GO Cellular Component Evidence	GO Molecular Function ID	GO Molecular Function Term	GO Molecular Function Evidence	Pathway Source	Pathway Name	Protein Domains - Source	Protein Domains - Accession or domain name	Protein Domains - Description	category	up stream.10kb	intersense	down stream.10kb	antisense	hnp-1_(HuGene-2_0-st).rma-gene-full-Signal	hnp-2_(HuGene-2_0-st).rma-gene-full-Signal	hnp-3_(HuGene-2_0-st).rma-gene-full-Signal	hnp-con-1_(HuGene-2_0-st).rma-gene-full-Signal	hnp-con-2_(HuGene-2_0-st).rma-gene-full-Signal	hnp-con-3_(HuGene-2_0-st).rma-gene-full-Signal
16942378	C3orf49	chromosome 3 open reading frame 49	noncoding	< 1e-07	< 1e-07	4.07	77.42	18.8679	up	ENST00000491896	ENSEMBL	cdna:known chromosome:GRCh37:3:63809176:63817782:1 gene:ENSG00000163632	chr3	+	63805038	63834312	---	---	---	---	---	---	---	---	---	---	---	---	---	---	main				THOC7	6.38518	6.28649	6.16056	2.22045	1.97563	1.83242
[truncated: 631 more rows]

## Sheet: gene-list
Gene Symbol
A2M
ABCA4
ABCA5
ABCA6
ABCA8
ABCA9
ABCC1
ABCG2
ABHD2
ABL2
ABLIM3
ACACA
ACADSB
ACAT2
ACO1
[truncated: 1,647 more rows]

## Sheet: ncRNA-list
ncRNA Accession
[truncated: 595 more rows]
